# Supplementary material for: 18 F-labelling of nitrogen-containing aryl boronates – anti-cancer drug melflufen as a case study
Source: Royal Society of Chemistry journal article supplement (doi:10.1039/d4qo01594k), 2024-01-01

Supporting Information

**$^{18}\text{F}$ -Labelling of Nitrogen-containing Aryl Boronates – Anti-cancer Drug  
Melflufen as a Case Study**

Kevin Bajerke,<sup>a</sup> Fredrik Lehmann,<sup>b</sup> Gunnar Antoni,<sup>c</sup> Kálmán J. Szabó\*<sup>a</sup>

---

<sup>a</sup>Department of Organic Chemistry, Stockholm University, SE-106 91, Sweden. Email: [kalman.j.szabo@su.se](mailto:kalman.j.szabo@su.se); Web: <http://www.organ.su.se/ks/>

<sup>b</sup>Oncopeptides AB, Banvaktsvägen 22, SE-171 48, Sweden.

<sup>c</sup>Department of Medicinal Chemistry, Uppsala University, SE-751 23, Sweden.

## Table of Contents

|        |                                                                                                                                                          |    |
|--------|----------------------------------------------------------------------------------------------------------------------------------------------------------|----|
| 1.     | General Information.....                                                                                                                                 | 3  |
| 2.     | Synthesis and Characterisation of Pinacol Boronates .....                                                                                                | 4  |
| 2.1.   | Synthesis of Model Substrate 2a .....                                                                                                                    | 4  |
| 2.2.   | Synthesis of Propyl Meflufen Boronate Analogues 3 .....                                                                                                  | 6  |
| 2.2.1. | Synthesis of Propyl Meflufen Boronate Analogue 3a and 3c.....                                                                                            | 6  |
| 2.2.2. | Synthesis of Propyl Meflufen Boronate Analogue 3b .....                                                                                                  | 9  |
| 2.2.3. | Synthesis of Propyl Meflufen Boronate Analogue 3d .....                                                                                                  | 10 |
| 3.     | Synthesis and Characterisation of Additives Propyl Meflufen Analogues 1.....                                                                             | 15 |
| 3.1.   | Synthesis of Additive Propyl Meflufen Analogue 1a, 1c and 1f.....                                                                                        | 15 |
| 3.2.   | Synthesis of Additive Propyl Meflufen Analogue 1d .....                                                                                                  | 18 |
| 3.3.   | Synthesis of Additive Propyl Meflufen Analogue 1e .....                                                                                                  | 19 |
| 4.     | Synthesis and Characterisation of Fluorine-19 References.....                                                                                            | 20 |
| 4.1.   | Synthesis of Fluorine-19 Reference 2b for [ <sup>18</sup> F]2b.....                                                                                      | 20 |
| 4.2.   | Synthesis of Fluorine-19 Reference 4a for [ <sup>18</sup> F]4a .....                                                                                     | 21 |
| 5.     | Radiochemical Studies.....                                                                                                                               | 23 |
| 5.1.   | General Information .....                                                                                                                                | 23 |
| 5.2.   | Preparation of [ <sup>18</sup> F]KF/K <sub>222</sub> .....                                                                                               | 23 |
| 5.3.   | Fluorine-18 Labelling of Phenylalanine derivative 2a (Table 1).....                                                                                      | 24 |
| 5.4.   | Functional Group Tolerance Test (Figure 3) .....                                                                                                         | 24 |
| 5.5.   | Fluorine-18 Labelling of Meflufen Analogues 3 (Scheme 1).....                                                                                            | 25 |
| 5.6.   | Examination of the Role of Additive in the Synthesis of Meflufen Propyl Ester Radiotracer [ <sup>18</sup> F]1a and [ <sup>18</sup> F]4a (Figure 4) ..... | 25 |
| 5.7.   | Synthesis and Isolation of Meflufen Propyl Ester Analogue Radiotracer [ <sup>18</sup> F]1a .....                                                         | 25 |
| 6.     | References.....                                                                                                                                          | 27 |
| 7.     | Appendix .....                                                                                                                                           | 28 |
| 7.1.   | NMR Spectra .....                                                                                                                                        | 28 |
| 7.2.   | Radio/UV Analytical HPLC Chromatograms.....                                                                                                              | 56 |

## 1. General Information

Reagents were purchased from commercial suppliers and used without further purification, unless otherwise stated. Solvents were purchased from commercial suppliers and dried through a Vacuum Atmospheres Solvent Purifier system. Radiofluorinations were carried out in dry conical glass vials. For all radiofluorinations solvents, such as dry DMF and dry MeCN were purchased from commercial suppliers and stored in an N<sub>2</sub>-filled glovebox. For column chromatography silica gel (40-63 μm) from VWR Chemicals was used. TLC was performed with a suitable solvent system on aluminium sheets 60 F254 pre-coated with silica gel from Merck KGaA. UV active components were visualized by UV fluorescence using a UV-lamp (254 nm).

<sup>1</sup>H-, <sup>13</sup>C- and <sup>19</sup>F-NMR spectra were recorded by a spectrometer of the type DPX-400 (400 MHz) by Bruker. The spectra were recorded in CDCl<sub>3</sub> (internal standard: 7.26 ppm, <sup>1</sup>H; 77.16 ppm, <sup>13</sup>C), DMSO-*d*<sub>6</sub> (internal standard: 2.50 ppm, <sup>1</sup>H; 39.52 ppm, <sup>13</sup>C) or CD<sub>3</sub>OD (internal standard: 3.31 ppm, <sup>1</sup>H; 49.00 ppm, <sup>13</sup>C). <sup>1</sup>H-NMR spectra are represented as follows: chemical shift  $\delta$  in ppm (s = singlet, d = doublet, t = triplet, q = quartet, qi = quintet, sext = sextet, m = multiplet), coupling constant *J* in Hz and integrals. <sup>13</sup>C-NMR spectra are represented as follows: chemical shift  $\delta$  in ppm. High resolution mass data (HRMS) were obtained by using a MicrOTOF® by Bruker with Electron Spray Ionisation (ESI) technique. Specific optical rotation  $\alpha$  was measured with an Autopol IV® polarimeter by Rudolph Research Analytical (*l* = 1 dm). The unit of  $\alpha$  is °·ml·(g·dm)<sup>-1</sup> and the unit of the concentration (*c*) is g/100 ml. The general information of the radiochemical studies can be found in [section 5.1](#).

## 2. Synthesis and Characterisation of Pinacol Boronates

### 2.1. Synthesis of Model Substrate 2a

The model substrate for the benchmark reaction was synthesised from **S1** according to the scheme below.

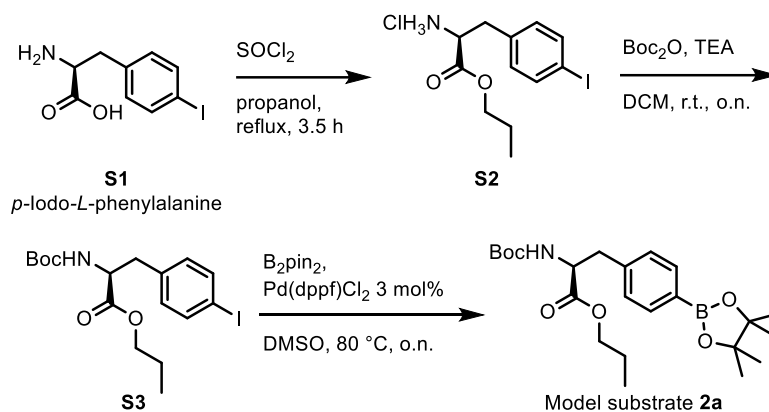

Propyl-(*S*)-2-amino-3-(4-iodophenyl)propanoate hydrochloride **S2**

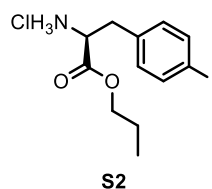

Thionyl chloride (300  $\mu\text{l}$ , 4.1 mmol, 1.5 equiv.) was added dropwise to a stirred, ice-cold suspension of (*S*)-Iodo-phenylalanine (**S1**) (800.0 mg, 2.8 mmol, 1.0 equiv.) in absolute <sup>n</sup>propanol (12 ml). Afterwards the reaction mixture was heated at reflux for 3.5 h. After evaporation of the solvent the propylester **S2** could be obtained as a white solid (1.02 g, 2.8 mmol, quant.) without further purification.

<sup>1</sup>H-NMR (400 MHz,  $\text{CD}_3\text{OD}$ ):  $\delta$  = 7.73 (d,  $J$  = 8.4 Hz, 2H), 7.06 (d,  $J$  = 8.3 Hz, 2H), 4.30 (t,  $J$  = 7.0 Hz, 1H), 4.20-4.10 (m, 2H), 3.22-3.11 (m, 2H), 1.68-1.59 (m, 2H), 0.90 (t,  $J$  = 7.5 Hz, 3H).

<sup>13</sup>C-NMR (101 MHz,  $\text{CD}_3\text{OD}$ ):  $\delta$  = 170.0, 139.4, 135.2, 132.5, 94.1, 69.2, 54.9, 37.1, 22.8, 10.5.

HRMS (ESI):  $[\text{M}+\text{Na}]^+$ , calcd for  $\text{C}_{12}\text{H}_{16}\text{INO}_2\text{Na}^+$ : 356.0118, found: 356.0114.

$[\alpha]_{589}^{26}$ : +57.20 ( $c$  = 0.25,  $\text{CHCl}_3$ ).

Propyl-(*S*)-2-((*tert*-butoxycarbonyl)amino)-3-(4-iodophenyl)propanoate **S3**

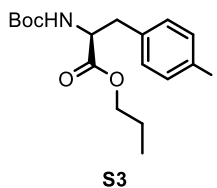

Boc-anhydride (367  $\mu$ l, 1.6 mmol, 1.2 equiv.) and triethylamine (560  $\mu$ l, 4.1 mmol, 3.0 equiv.) were added to a solution of hydrochloride salt **S2** (500.0 mg, 1.5 mmol, 1.0 equiv.) in DCM (2.7 ml, 0.5 M) at r.t. The reaction mixture was stirred for 16 h at r.t. and concentrated under reduced pressure. The product was purified by silica-gel chromatography (*n*-pentane:EtOAc = 9:1) yielding Boc-protected amine **S3** as a viscous oil (570.0 mg, 1.3 mmol, 97%).

**<sup>1</sup>H-NMR** (400 MHz, CDCl<sub>3</sub>):  $\delta$  = 7.61 (d, *J* = 8.2 Hz, 2H), 6.88 (d, *J* = 8.3 Hz, 2H), 4.98 (d, *J* = 8.0 Hz, 1H), 4.57-4.52 (m, 1H), 4.10-4.00 (m, 2H), 3.09-2.96 (m, 2H), 1.62 (sext, *J* = 7.2 Hz, 2H), 1.41 (s, 9H), 0.90 (t, *J* = 7.5 Hz, 3H).

**<sup>13</sup>C-NMR** (101 MHz, CDCl<sub>3</sub>):  $\delta$  = 171.8, 155.1, 137.7, 136.0, 131.5, 92.6, 80.1, 67.2, 54.4, 38.1, 28.4, 22.0, 10.5.

**HRMS** (ESI): [M+Na]<sup>+</sup>, calcd for C<sub>17</sub>H<sub>24</sub>INO<sub>4</sub>Na<sup>+</sup>: 456.0642, found: 456.0642.

**[ $\alpha$ ]<sub>D</sub><sup>28</sup>**: +33.2 (*c* = 0.25, CHCl<sub>3</sub>).

**Melting point**: 99.0-99.6 °C.

Propyl-(*S*)-2-((*tert*-butoxycarbonyl)amino)-3-(4-(4,4,5,5-tetramethyl-1,3,2-dioxaborolan-2-yl)phenyl)propanoate - Model Substrate **2a**

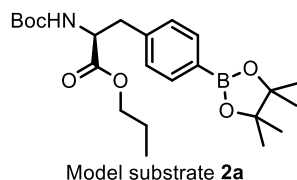

Synthesis of **2a** from **S3** is based on the procedure by Weil and co-workers.<sup>1</sup> A round bottom flask was charged with iodoarene **S3** (300.0 mg, 0.7 mmol, 1.0 equiv.), Pd(dppf)Cl<sub>2</sub> (15.2 mg, 0.02 mmol, 0.03 equiv.), B<sub>2</sub>pin<sub>2</sub> (229.0 mg, 0.9 mmol, 1.3 equiv.) and KOAc (204.0 mg, 2.1 mmol, 3.0 equiv.) and degassed (N<sub>2</sub>, 3x). After addition of dry degassed DMSO (7 ml) the solution was stirred at 80 °C for 18 h under N<sub>2</sub>. Then, DCM and water were added to the black reaction mixture. After phase separation the water phase was extracted with DCM (x3). The combined organic phases were dried over Na<sub>2</sub>SO<sub>4</sub> and the solvent was removed under reduced pressure. Purification by silica gel column chromatography (*n*-pentane:EtOAc = 9:1) yielded the desired pinacol boronate **2a** as a colourless viscous oil (218.0 mg, 0.5 mmol, 73 %).

**<sup>1</sup>H-NMR** (400 MHz, CDCl<sub>3</sub>):  $\delta$  = 7.73 (d, *J* = 7.6 Hz, 2H), 7.14 (d, *J* = 7.6 Hz, 2H), 4.94 (d, *J* = 8.1 Hz, 1H), 4.59-4.55 (m, 1H), 4.05 (t, *J* = 6.7 Hz, 2H), 3.16-3.06 (m, 2H), 1.62 (sext, *J* = 7.1 Hz, 2H), 1.42 (s, 9H), 1.34 (s, 12H), 0.90 (t, *J* = 7.3 Hz, 3H).

**<sup>13</sup>C-NMR** (101 MHz, CDCl<sub>3</sub>):  $\delta$  = 172.0, 155.2, 139.5, 135.1, 128.9, 83.9, 80.0, 67.1, 54.5, 38.6, 28.5, 25.0, 22.0, 10.5.

HRMS (ESI):  $[M+Na]^+$ , calcd for  $C_{23}H_{36}BNO_6Na^+$ : 456.2532, found: 456.2550.

$[\alpha]_{589}^{28}$ : +25.2 ( $c = 0.25$ ,  $CHCl_3$ ).

## 2.2. Synthesis of Propyl Melflufen Boronate Analogues 3

The melflufen pinacol boronate analogues **3** were synthesised according to the scheme shown down below. The synthesis of **S2** from **S1** is described in [section 2.1](#).

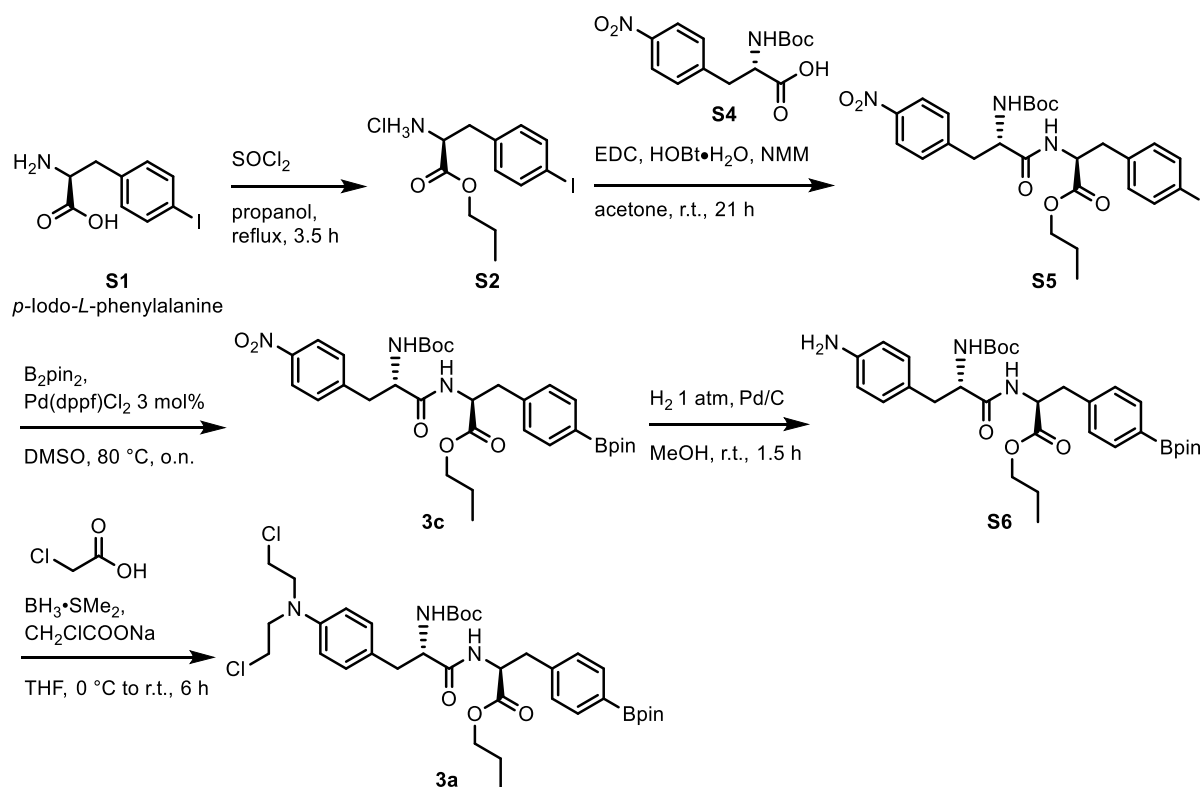

### 2.2.1. Synthesis of Propyl Melflufen Boronate Analogue 3a and 3c

Propyl-(*S*)-2-((*S*)-2-((*tert*-butoxycarbonyl)amino)-3-(4-nitrophenyl)propanamido)-3-(4-iodophenyl)propanoate **S5**

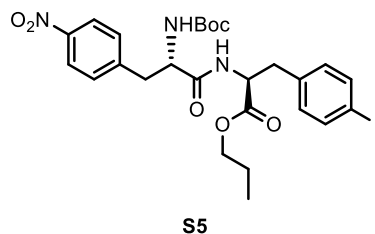

Synthesis of **S5** from **S2** is based on the procedure published by Wennerberg and co-workers.<sup>2</sup> To a round bottom flask charged with acetone (7 ml) was added *L*-Boc-4-nitrophenylalanine **S4** (600.0 mg, 1.9 mmol, 1.0 equiv.), *N*-methylmorpholine (920  $\mu$ l, 6.8 mmol, 3.5 equiv.), hydrochloride salt **S2** (730.4 mg, 2.0 mmol, 1.02 equiv.), HOBT·H<sub>2</sub>O (29.0 mg, 0.7 mmol, 0.1 equiv.), and EDC·HCl (370  $\mu$ l, 2.1 mmol, 1.1 equiv.). The resulting suspension

was stirred at r.t. for 21 h. The solvent was removed under reduced pressure and replaced by EtOAc and water. Phases were allowed to separate after stirring for 5 min. The aqueous phase was extracted with EtOAc (3x). The combined organic phases were washed with NaHCO<sub>3</sub> solution (sat.), NH<sub>4</sub>Cl solution (sat.), and brine. Purification by silica gel chromatography (*n*-pentane:EtOAc = 2:1, dry loaded) yielded the dipeptide **S5** as a white solid (1050.0 mg, 1.7 mmol, 87%).

<sup>1</sup>H-NMR (400 MHz, DMSO-*d*<sub>6</sub>): δ = 8.40 (d, *J* = 7.6 Hz, 1H), 8.15 (d, *J* = 8.6 Hz, 2H), 7.63 (d, *J* = 8.2 Hz, 2H), 7.51 (d, *J* = 8.6 Hz, 2H), 7.05 (d, *J* = 8.2 Hz, 2H), 7.00 (d, *J* = 8.9 Hz, 1H), 4.51-4.46 (m, 1H), 4.28-4.22 (m, 1H), 3.99-3.90 (m, 2H), 3.03-2.79 (m, 4H), 1.50 (sext, *J* = 7.1 Hz, 2H), 1.27 (s, 9H), 0.81 (t, *J* = 7.5 Hz, 3H).

<sup>13</sup>C-NMR (101 MHz, DMSO-*d*<sub>6</sub>): δ = 171.3, 171.1, 155.1, 146.5, 146.2, 137.0, 136.8, 131.6, 130.5, 123.1, 92.5, 78.1, 66.1, 55.0, 53.3, 37.3, 36.1, 28.0, 21.4, 10.1.

HRMS (ESI): [M+Na]<sup>+</sup>, calcd for C<sub>26</sub>H<sub>32</sub>IN<sub>3</sub>O<sub>7</sub>Na<sup>+</sup>: 648.1177, found: 648.1162.

[α]<sub>589</sub><sup>28</sup>: +14.8 (*c* = 0.25, CHCl<sub>3</sub>).

Melting point: 169.0-171.0 °C.

Propyl-(*S*)-2-((*S*)-2-((*tert*-butoxycarbonyl)amino)-3-(4-nitrophenyl)propanamido)-3-(4-(4,4,5,5-tetramethyl-1,3,2-dioxaborolan-2-yl)phenyl)propanoate **3c**

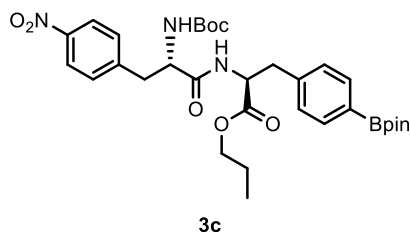

Synthesis of **3c** from **S5** is based on the procedure published by Weil and co-workers.<sup>1</sup> A round bottom flask was stocked with Iodoarene **S5** (1050.0 mg, 1.0 mmol, 1.0 equiv.), Pd(dppf)Cl<sub>2</sub> (36.9 mg, 0.05 mmol, 0.03 equiv.), B<sub>2</sub>pin<sub>2</sub> (554.2 mg, 2.2 mmol, 1.3 equiv.) and KOAc (494.3 mg, 5.0 mmol, 3.0 equiv.) and degassed (N<sub>2</sub>, 3x). After addition of dry degassed DMSO (17 ml) the solution was stirred at 80 °C for 18 h under one atmosphere of N<sub>2</sub>. Then, DCM and water were added to the black reaction mixture. After phase separation the water phase was extracted with DCM (3x). The combined organic phases were dried through Na<sub>2</sub>SO<sub>4</sub> and the solvent was removed under reduced pressure. Column chromatography (*n*-pentane:EtOAc = 4:1) yielded the desired pinacol boronate **3c** as a white solid (862.0 mg, 1.4 mmol, 82%).

<sup>1</sup>H-NMR (400 MHz, CDCl<sub>3</sub>): δ = 8.12 (d, *J* = 8.5 Hz, 2H), 7.71 (d, *J* = 7.5 Hz, 2H), 7.34 (d, *J* = 8.2 Hz, 2H), 7.06 (d, *J* = 7.5 Hz, 2H), 6.28 (d, *J* = 7.6 Hz, 1H), 4.92 (s, 1H), 4.81-4.76 (m, 1H), 4.36 (m<sub>c</sub>, 1H), 4.09-3.98 (m, 2H), 3.23-3.05 (m, 4H), 1.62 (sext, *J* = 7.2 Hz, 2H), 1.39 (s, 9H), 1.33 (s, 12H), 0.90 (t, *J* = 7.3 Hz, 3H).

<sup>13</sup>C-NMR (101 MHz, CDCl<sub>3</sub>): δ = 171.0, 170.1, 155.3, 147.2, 144.5, 138.8, 135.2, 131.0, 130.4, 128.8, 123.9, 84.0, 80.8, 67.5, 55.3, 53.3, 38.3, 38.2, 28.4, 25.0, 22.0, 10.4.

HRMS (ESI): [M+Na]<sup>+</sup>, calcd for C<sub>32</sub>H<sub>44</sub>BN<sub>3</sub>O<sub>9</sub>Na<sup>+</sup>: 648.3068, found: 648.3095.

[α]<sub>589</sub><sup>28</sup>: +13.2 (*c* = 0.25, CHCl<sub>3</sub>).

Melting point: 154.5-157.8 °C.

Propyl-(*S*)-2-((*S*)-3-(4-aminophenyl)-2-((*tert*-butoxycarbonyl)amino)propanamido)-3-(4-(4,4,5,5-tetramethyl-1,3,2-dioxaborolan-2-yl)phenyl)propanoate **S6**

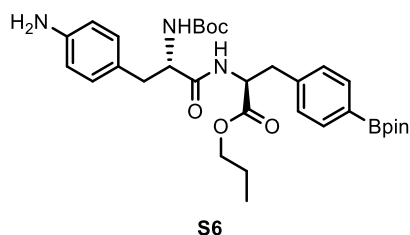

Synthesis of **S6** from **3c** is based on the procedure by Wennerberg and co-workers.<sup>2</sup> A round bottom flask containing a solution of nitro compound **3c** (850.0 mg, 1.4 mmol, 1.0 equiv.), and Pd/C (10% Pd loaded on C, 55% moist; 165.5 mg, 0.07 mmol, 5 mol%) in MeOH (27 ml) was equipped with a H<sub>2</sub> balloon. The reaction mixture was stirred for 1.5 h at r.t. while H<sub>2</sub> passed through it. Then, the suspension was filtered through a plug of Celite®. Removal of the solvent yielded the amine **S6** without further purification as a white solid (805.0 mg, 1.4 mmol, quant.).

<sup>1</sup>H-NMR (400 MHz, DMSO-*d*<sub>6</sub>): δ = 8.20 (d, *J* = 7.8 Hz, 1H), 7.58 (d, *J* = 7.9 Hz, 2H), 7.23 (d, *J* = 7.5 Hz, 2H), 6.84 (d, *J* = 8.2 Hz, 2H), 6.67 (d, *J* = 8.8 Hz, 1H), 6.43 (d, *J* = 8.20 Hz, 2H), 4.83 (s, 2H), 4.51-4.46 (m, 1H), 4.06-4.02 (m, 1H), 3.99-3.91 (m, 2H), 3.04 (dd, *J* = 13.8, 6.0 Hz, 1H), 2.97 (dd, *J* = 13.8, 8.2 Hz, 1H), 2.70 (dd, *J* = 14.0, 4.1 Hz, 1H), 2.52-2.50 (m, 1H), 1.50 (sext, *J* = 7.0 Hz, 2H), 1.30 (s, 9H), 1.27 (s, 12H), 0.81 (t, *J* = 7.5 Hz, 3H).

<sup>13</sup>C-NMR (101 MHz, DMSO-*d*<sub>6</sub>): δ = 172.0, 171.2, 155.0, 146.8, 140.5, 134.4, 129.5, 128.7, 124.8, 113.6, 83.5, 77.9, 66.0, 55.9, 53.3, 36.9, 36.6, 28.1, 24.6, 21.4, 10.2.

HRMS (ESI): [M+Na]<sup>+</sup>, calcd for C<sub>32</sub>H<sub>46</sub>BN<sub>3</sub>O<sub>7</sub>Na<sup>+</sup>: 618.3327, found: 618.3341.

[α]<sub>589</sub><sup>28</sup>: +28.4 (*c* = 0.25, CHCl<sub>3</sub>).

**Melting point:** 66.5-70.5 °C.

Propyl-(*S*)-2-((*S*)-3-(4-(bis(2-chloroethyl)amino)phenyl)-2-((*tert*-butoxycarbonyl)amino)propanamido)-3-(4-(4,4,5,5-tetramethyl-1,3,2-dioxaborolan-2-yl)phenyl)propanoate **3a**

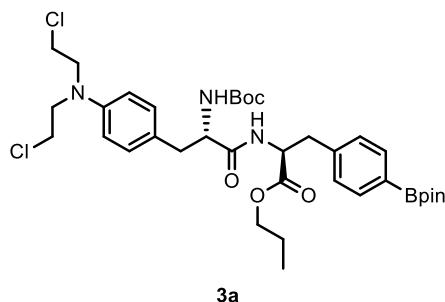

Synthesis of **3a** from **S6** is based on the procedure by Wennerberg and co-workers.<sup>2</sup> To a round bottom flask containing THF (4.2 ml) was added amine **S6** (500.0 mg, 0.84 mmol, 1.0 equiv.). After decreasing the temperature to 0 °C monochloroacetic acid (2.06 g, 21.8 mmol, 26.0 equiv.) and sodium monochloroacetate (978 mg, 8.4 mmol, 10.0 equiv.) were added portion wise after each other. Borane dimethylsulfide (1.1 ml, 10.9 mmol, 13.0 equiv.) was added dropwise over 30 min at 0 °C. After stirring for further 1 h at 0 °C the cooling bath was removed and the reaction mixture was stirred for 2 h at r.t. Subsequently, the reaction mixture was cooled to



0 °C again, quenched by slow addition of NaHCO<sub>3</sub> solution (sat.) and EtOAc. After stirring for 2 h at 0 °C the phases were separated and the water phase was extracted with DCM (3x). The combined organic phases were washed with NH<sub>4</sub>Cl solution (sat.) and brine. After removal of the solvent column chromatography (*n*-pentane:EtOAc = 2:1, dry loaded) yielded the alkylator **3a** as a white solid (471.2 mg, 0.6 mmol, 78%).

<sup>1</sup>H-NMR (400 MHz, CDCl<sub>3</sub>): δ = 7.65 (d, *J* = 7.9 Hz, 2H), 7.10 (d, *J* = 8.3 Hz, 2H), 7.00 (d, *J* = 7.8 Hz, 2H), 6.61 (d, *J* = 8.6 Hz, 2H), 6.37 (d, *J* = 7.5 Hz, 1H), 4.91 (s, 1H), 4.81-4.76 (m, 1H), 4.30 (s, 1H), 4.06-3.94 (m, 2H), 3.71-3.67 (m, 4H), 3.61-3.58 (m, 4H), 3.12-3.03 (m, 2H), 2.98-2.90 (m, 2H), 1.60 (sext, *J* = 7.2 Hz, 2H), 1.40 (s, 9H), 1.33 (s, 12H), 0.88 (t, *J* = 7.4 Hz, 3H).

<sup>13</sup>C-NMR (101 MHz, CDCl<sub>3</sub>): δ = 171.0, 171.0, 155.4, 145.2, 139.1, 135.1, 130.9, 128.8, 125.4, 112.4, 83.9, 80.4, 67.2, 55.8, 53.6, 53.3, 40.5, 38.2, 37.2, 28.4, 25.0, 21.9, 10.5.

HRMS (ESI): [M+Na]<sup>+</sup>, calcd for C<sub>36</sub>H<sub>52</sub>BCl<sub>2</sub>N<sub>3</sub>O<sub>7</sub>Na<sup>+</sup>: 742.3174, found: 742.3168.

[α]<sub>D</sub><sup>28</sup><sub>589</sub>: +30.8 (*c* = 0.25, CHCl<sub>3</sub>).

Melting point: 92.5-93.5 °C.

### 2.2.2. Synthesis of Propyl Meflufen Boronate Analogue **3b**

Propyl-(*S*)-2-((*S*)-2-((*tert*-butoxycarbonyl)amino)-3-(4-(diethylamino)phenyl)propanamido)-3-(4-(4,4,5,5-tetramethyl-1,3,2-dioxaborolan-2-yl)phenyl)propanoate **3b**

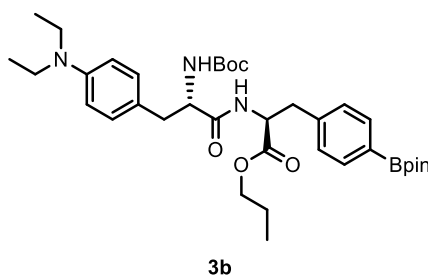

Synthesis of **3b** from **S6** is based on the procedure by Wennerberg and co-workers.<sup>2</sup> To a round bottom flask containing THF (840 μl) was added amine **S6** (100.0 mg, 0.17 mmol, 1.0 equiv.). After decreasing the temperature to 0 °C acetic acid (262.2 g, 4.4 mmol, 26.0 equiv.) and sodium acetate (137.8 mg, 1.7 mmol, 10.0 equiv.) were added portion wise after each other. Borane dimethylsulfide (220 μl, 2.2 mmol, 13.0 equiv.) was added dropwise over 30 min at 0 °C. After stirring for further 1 h at 0 °C the cooling bath was removed and the reaction mixture was stirred for 48 h at r.t. Then, the reaction mixture was cooled to 0 °C again, quenched by slow addition of NaHCO<sub>3</sub> solution (sat.) and EtOAc. After stirring for 2 h at 0 °C the phases were separated and the aqueous phase was extracted with DCM (3x). The combined organic phases were washed with NH<sub>4</sub>Cl solution (sat.) and brine. After removal of the solvent purification by silica gel column chromatography (*n*-pentane:EtOAc = 2:1, dry loaded) yielded the tertiary amine **3b** as a white solid (80.0 mg, 0.12 mmol, 73%).

<sup>1</sup>H-NMR (400 MHz, CDCl<sub>3</sub>): δ = 7.66 (d, *J* = 7.9 Hz, 2H), 7.03 (d, *J* = 8.4 Hz, 2H), 6.98 (d, *J* = 8.0 Hz, 2H), 6.61 (d, *J* = 8.8 Hz, 2H), 6.34 (d, *J* = 7.3 Hz, 1H), 4.91 (s, 1H), 4.79-4.75 (m, 1H), 4.27 (s, 1H), 4.05-3.93 (m, 2H), 3.32 (q, *J* = 7.2 Hz, 4H), 3.10-2.87 (m, 4H), 1.58 (sext, *J* = 7.2 Hz, 2H), 1.40 (s, 9H), 1.33 (s, 12H), 1.13 (t, *J* = 7.2 Hz, 6H), 0.86 (t, *J* = 7.3 Hz, 3H).

$^{13}\text{C-NMR}$  (101 MHz,  $\text{CDCl}_3$ ):  $\delta = 171.2, 171.0, 155.4, 147.0, 139.2, 135.1, 130.4, 128.8, 122.7, 112.2, 83.8, 80.2, 67.1, 55.9, 53.4, 44.4, 38.3, 37.3, 28.4, 25.0, 21.9, 12.7, 10.4$ .

**HRMS** (ESI):  $[\text{M}+\text{H}]^+$ , calcd for  $\text{C}_{36}\text{H}_{54}\text{BN}_3\text{O}_7\text{H}^+$ : 652.4134, found: 652.4125.

$[\alpha]_{589}^{27}$ : +26.80 ( $c = 0.25, \text{CHCl}_3$ ).

**Melting point**: 63.5-65.5 °C.

### 2.2.3. Synthesis of Propyl Melflufen Boronate Analogue **3f**

The melflufen pinacol boronate analogue **3f** was synthesised from **S7** according to the scheme shown down below.

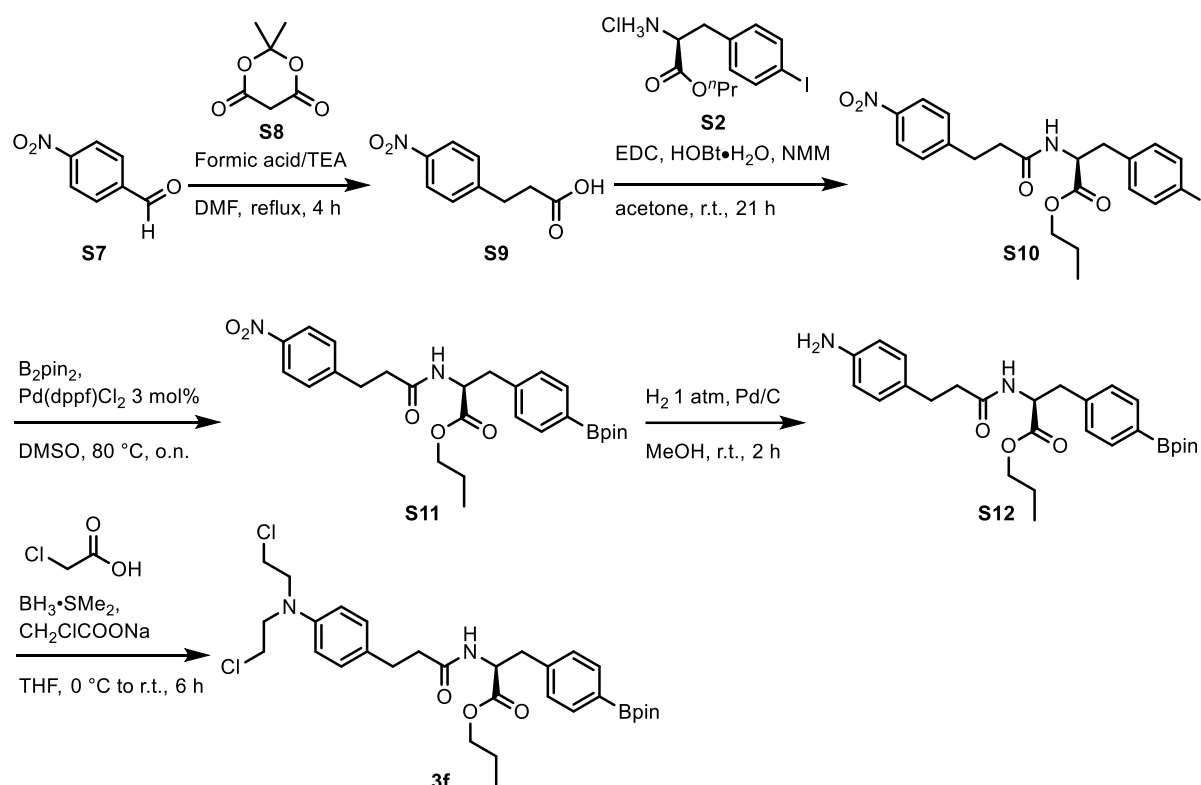

#### 3-(4-nitrophenyl)propanoic acid **S9**

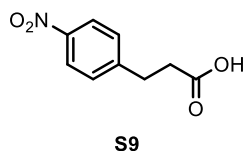

Synthesis of **S9** from **S7** is based on the procedure by Mykhailiuk and co-workers.<sup>3</sup> TEA (515  $\mu\text{l}$ , 3.7 mmol, 1.4 equiv.) was added dropwise to stirred formic acid (396  $\mu\text{l}$ , 9.3 mmol, 3.5 equiv.) at 0 °C. To the resulting reaction mixture DMF (1 ml), Meldrum's acid **S8** (381.5 mg, 2.6 mmol, 1.0 equiv.) and *p*-nitro benzaldehyde **S7** (400.0 mg, 2.6 mmol, 1.0 equiv.) were added. This reaction mixture was heated at reflux for 4 h. The residue resulted after removal of the solvent was dissolved in water. The solution was acidified with HCl (conc.) to pH = 2.

The resulted precipitate was filtered off, washed with ice-cold EtOAc and dried under vacuum. The carboxylic acid **S9** was obtained as a brownish solid (283.0g, 1.5 mmol, 55%) and used without further purification.

**<sup>1</sup>H-NMR** (400 MHz, CD<sub>3</sub>OD):  $\delta$  = 8.16 (d,  $J$  = 8.8 Hz, 2H), 7.49 (d,  $J$  = 8.7 Hz, 2H), 3.04 (t,  $J$  = 7.6 Hz, 2H), 2.68 (t,  $J$  = 7.6 Hz, 2H).

**<sup>13</sup>C-NMR** (101 MHz, CD<sub>3</sub>OD):  $\delta$  = 176.0, 150.4, 148.0, 130.6, 124.5, 35.8, 31.7.

The analytical data is in accordance to the literature.<sup>3</sup>

#### Propyl-(S)-3-(4-iodophenyl)-2-(3-(4-nitrophenyl)propanamido)propanoate **S10**

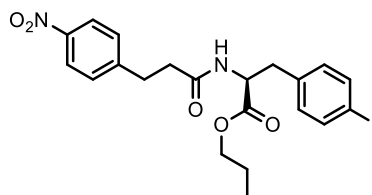

**S10**

Synthesis of **S10** from **S9** is based on the procedure by Wennerberg and co-workers.<sup>2</sup> To a round bottom flask charged with acetone (4 ml) was added carboxylic acid **S9** (200.0 mg, 1.3 mmol, 1.0 equiv.), N-methylmorpholine (390  $\mu$ l, 3.6 mmol, 3.5 equiv.), hydrochloride salt **S2** (387.1 mg, 1.05 mmol, 1.02 equiv.), HOBT·H<sub>2</sub>O (15.3 mg, 0.1 mmol, 0.1 equiv.), and EDC-HCl (200  $\mu$ l, 1.1 mmol, 1.1 equiv.). The resulting suspension was stirred at r.t. for 21 h. The solvent was removed under reduced pressure and replaced by EtOAc and water. The phases were allowed to separate after stirring for 5 min. The aqueous phase was extracted with EtOAc (3x). The combined organic phases were washed with NaHCO<sub>3</sub> solution (sat.), NH<sub>4</sub>Cl solution (sat.), and brine. Purification by silical gel column chromatography (*n*-pentane:EtOAc = 2:1, dry loaded) yielded the dipeptide **S10** as a white solid (180.0 mg, 0.4 mmol, 46%).

**<sup>1</sup>H-NMR** (400 MHz, DMSO-*d*<sub>6</sub>):  $\delta$  = 8.36 (d,  $J$  = 7.8 Hz, 1H), 8.11 (d,  $J$  = 8.7 Hz, 2H), 7.60 (d,  $J$  = 8.2 Hz, 2H), 7.41 (d,  $J$  = 8.7 Hz, 2H), 6.98 (d,  $J$  = 8.2 Hz, 2H), 4.46-4.41 (m, 1H), 3.94 (t,  $J$  = 6.6 Hz, 2H), 2.97-2.79 (m, 4H), 2.44 (t,  $J$  = 7.4 Hz, 2H), 1.49 (sext,  $J$  = 7.2 Hz, 2H), 0.80 (t,  $J$  = 7.4 Hz, 3H).

**<sup>13</sup>C-NMR** (101 MHz, DMSO-*d*<sub>6</sub>):  $\delta$  = 171.4, 171.0, 149.6, 145.9, 137.0, 136.9, 131.5, 129.5, 123.3, 92.4, 66.0, 53.3, 36.2, 35.5, 30.5, 21.4, 10.1.

**HRMS** (ESI): [M+Na]<sup>+</sup>, calcd for C<sub>21</sub>H<sub>23</sub>IN<sub>2</sub>O<sub>7</sub>Na<sup>+</sup>: 533.0544, found: 533.0555.

**[ $\alpha$ ]<sub>589</sub><sup>28</sup>**: +52.8 ( $c$  = 0.25, CHCl<sub>3</sub>).

**Melting point**: 150.2-150.9 °C.

Propyl-(S)-2-(3-(4-nitrophenyl)propanamido)-3-(4-(4,4,5,5-tetramethyl-1,3,2-dioxaborolan-2-yl)phenyl)propanoate **S11**

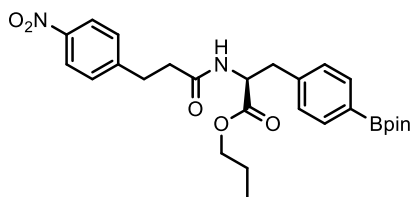

**S11**

Synthesis of **S11** from **S10** is based on the procedure by Weil and co-workers.<sup>1</sup> A round bottom flask was charged with iodoarene **S10** (250.0 mg, 1.0 mmol, 1.0 equiv.), Pd(dppf)Cl<sub>2</sub> (10.8 mg, 0.02 mmol, 0.03 equiv.), B<sub>2</sub>pin<sub>2</sub> (161.7 mg, 0.6 mmol, 1.3 equiv.) and KOAc (144.2 mg, 1.5 mmol, 3.0 equiv.) and degassed (N<sub>2</sub>, 3x). After addition of dry degassed DMSO (4.9 ml) the solution was stirred at 80 °C for 18 h under one atmosphere of N<sub>2</sub>. After completion DCM and water were added to the black reaction mixture. After phase separation the water phase was extracted with DCM (3x). The combined organic phases were dried through Na<sub>2</sub>SO<sub>4</sub> and the solvent was removed under reduced pressure. Purification by silica gel column chromatography (n-pentane:EtOAc = 4:1) yielded the desired pinacol boronate **S11** as a colourless oil (210.0 mg, 0.4 mmol, 84%).

<sup>1</sup>H-NMR (400 MHz, CDCl<sub>3</sub>): δ = 8.13 (d, J = 8.7 Hz, 2H), 7.69 (d, J = 8.1 Hz, 2H), 7.33 (d, J = 8.7 Hz, 2H), 7.02 (d, J = 8.1 Hz, 2H), 5.82 (d, J = 7.7 Hz, 1H), 4.87 (dt, J = 7.8, 5.7 Hz, 1H), 4.11-4.01 (m, 2H), 3.16-3.07 (m, 2H), 3.04 (t, J = 7.5 Hz, 2H), 2.56-2.44 (m, 2H), 1.64 (sext, J = 7.2 Hz, 2H), 1.34 (s, 12H), 0.92 (t, J = 7.4 Hz, 3H).

<sup>13</sup>C-NMR (101 MHz, CDCl<sub>3</sub>): δ = 171.6, 170.7, 148.6, 146.8, 139.0, 135.2, 129.4, 128.8, 123.9, 84.8, 67.4, 53.1, 38.1, 37.2, 31.1, 25.0, 22.0, 10.5.

HRMS (ESI): [M+Na]<sup>+</sup>, calcd for C<sub>27</sub>H<sub>35</sub>BN<sub>2</sub>O<sub>7</sub>Na<sup>+</sup>: 533.2434, found: 533.2437.

[α]<sub>D</sub><sup>28</sup>: +26.0 (c = 0.25, CHCl<sub>3</sub>).

Propyl-(S)-2-(3-(4-aminophenyl)propanamido)-3-(4-(4,4,5,5-tetramethyl-1,3,2-dioxaborolan-2-yl)phenyl)propanoate **S12**

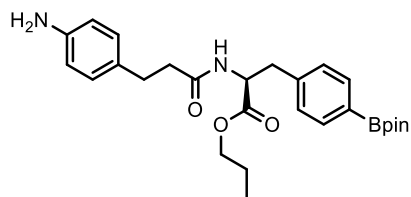

**S12**

Synthesis of **S12** from **S11** is based on the procedure by Wennerberg and co-workers.<sup>2</sup> A round bottom flask containing a solution of nitro compound **S11** (180.0 mg, 0.4 mmol, 1.0 equiv.), and Pd/C (10% Pd loaded on C, 55% moist; 47.3 mg, 0.02 mmol, 5 mol%) in MeOH (7 ml) was equipped with a H<sub>2</sub> balloon. The reaction was stirred for 1.5 h at r.t. while H<sub>2</sub> passed through the reaction mixture. Then, the suspension was filtered through a plug of Celite®. Removal of the solvent yielded the amine **S12** without further purification as a white solid (169 mg, 0.4 mmol, quant.).

**<sup>1</sup>H-NMR** (400 MHz, DMSO-*d*<sub>6</sub>):  $\delta$  = 8.26 (d, *J* = 7.8 Hz, 1H), 7.58 (d, *J* = 7.9 Hz, 2H), 7.21 (d, *J* = 7.9 Hz, 2H), 7.84 (d, *J* = 8.6 Hz, 2H), 6.44 (d, *J* = 8.6 Hz, 2H), 4.80 (s, 2H), 4.48-4.42 (m, 1H), 3.96-3.93 (m, 2H), 3.00 (dd, *J* = 13.5, 5.9 Hz, 1H), 2.89 (dd, *J* = 8.8, 13.8 Hz, 1H), 2.46-2.44 (m, 2H), 2.27-2.23 (m, 2H), 1.50 (sext, *J* = 7.1 Hz, 2H), 1.28 (s, 12H), 0.80 (t, *J* = 7.2 Hz, 3H).

**<sup>13</sup>C-NMR** (101 MHz, DMSO-*d*<sub>6</sub>):  $\delta$  = 171.8, 171.6, 146.5, 140.8, 134.4, 134.1, 128.6, 128.5, 128.1, 113.9, 83.6, 65.9, 53.5, 37.3, 37.0, 30.3, 24.7, 21.4, 10.2.

**HRMS** (ESI): [M+Na]<sup>+</sup>, calcd for C<sub>27</sub>H<sub>37</sub>BN<sub>2</sub>O<sub>5</sub>Na<sup>+</sup>: 503.2692, found: 503.2697.

**[ $\alpha$ ]<sub>589</sub><sup>27</sup>**: +8.80 (*c* = 0.25, CHCl<sub>3</sub>).

Propyl-(*S*)-2-(3-(4-(bis(2-chloroethyl)amino)phenyl)propanamido)-3-(4-(4,4,5,5-tetramethyl-1,3,2-dioxaborolan-2-yl)phenyl)propanoate **3f**

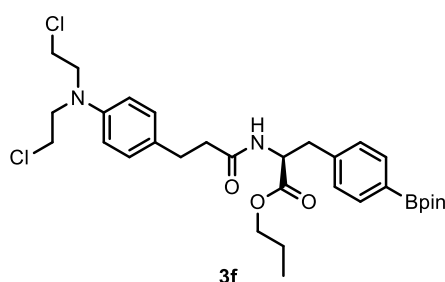

Synthesis of **3f** from **S12** is based on the procedure by Wennerberg and co-workers.<sup>2</sup> To a round bottom flask containing THF (1.2 ml) was added amine **S12** (120.0 mg, 0.25 mmol, 1.0 equiv.). After decreasing the temperature to 0 °C monochloroacetic acid (613.7 mg, 6.5 mmol, 26.0 equiv.) and sodium monochloroacetate (291.0 mg, 2.5 mmol, 10.0 equiv.) were added portion wise after each other. Borane dimethylsulfide (325  $\mu$ l, 10.9 mmol, 13.0 equiv.) was added dropwise over 30 min at 0 °C. After stirring for further 1 h at 0 °C the cooling bath was removed and the reaction mixture was stirred for 2 h at r.t. Then, the reaction mixture was cooled to 0 °C again, quenched by slow addition of NaHCO<sub>3</sub> solution (sat.) and EtOAc. After stirring for 2 h at 0 °C the phases were separated and the water phase was extracted with DCM (3x). The combined organic phases were washed with NH<sub>4</sub>Cl solution (sat.) and brine. After removal of the solvent purification by silica gel column chromatography (<sup>n</sup>pentane:EtOAc = 2:1, dry loaded) yielded the alkylator **3f** as a white solid (115.0 mg, 0.19 mmol, 76%).

**<sup>1</sup>H-NMR** (400 MHz, CDCl<sub>3</sub>):  $\delta$  = 7.64 (d, *J* = 7.9 Hz, 2H), 7.09 (d, *J* = 8.7 Hz, 2H), 6.91 (d, *J* = 7.9 Hz, 2H), 6.63 (d, *J* = 8.7 Hz, 2H), 5.85 (s, 1H), 4.88 (dt, *J* = 7.6, 5.4 Hz, 1H), 4.09-3.98 (m, 2H), 3.72-3.68 (m, 4H), 3.62-3.58 (m, 4H), 3.09 (d, *J* = 5.5 Hz, 2H), 2.92-2.79 (m, 2H), 2.52-2.35 (m, 2H), 1.63 (sext, *J* = 7.1 Hz, 2H), 1.34 (s, 12H), 0.91 (t, *J* = 7.4 Hz, 3H).

**<sup>13</sup>C-NMR** (101 MHz, CDCl<sub>3</sub>):  $\delta$  = 171.7, 171.6, 144.7, 139.2, 135.1, 129.8, 128.9, 112.3, 83.9, 67.3, 53.7, 53.1, 40.6, 38.7, 38.1, 30.5, 25.0, 22.0, 10.5.

**HRMS** (ESI): [M+Na]<sup>+</sup>, calcd for C<sub>31</sub>H<sub>43</sub>BCl<sub>2</sub>N<sub>2</sub>O<sub>5</sub>Na<sup>+</sup>: 627.2540, found: 627.2557.

**[ $\alpha$ ]<sub>589</sub><sup>28</sup>**: +56.00 (*c* = 0.25, CHCl<sub>3</sub>).

**Melting point**: 98.0-99.0 °C.



### 3. Synthesis and Characterisation of Propyl Meflufen Analogues 1

The meflufen pinacol boronate analogues were synthesised according to the scheme shown down below.

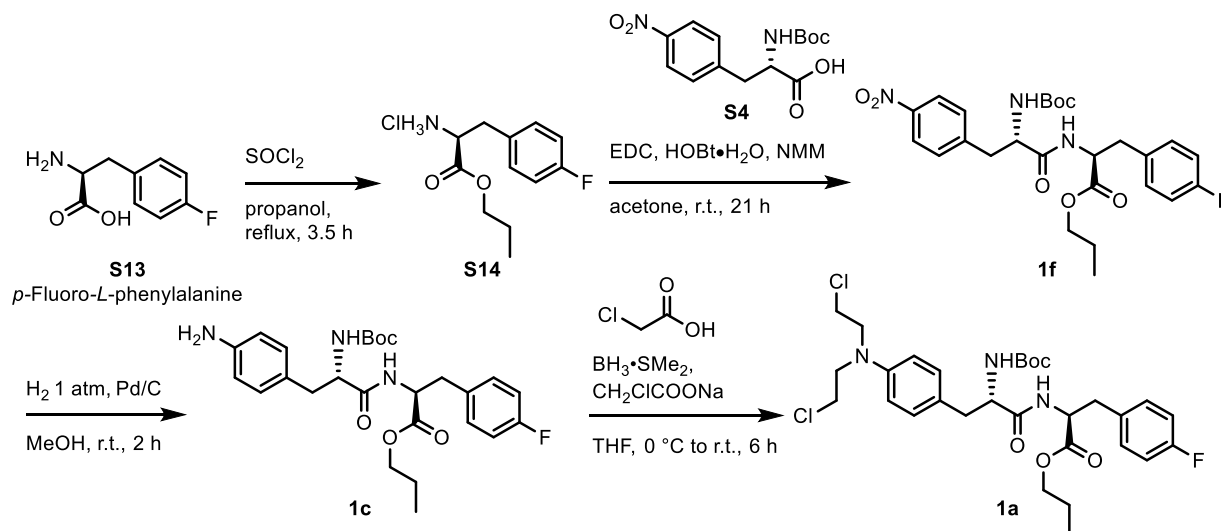

#### 3.1. Synthesis of Propyl Meflufen Analogues 1a, 1c and 1f

Propyl-(*S*)-2-amino-3-(4-fluorophenyl)propanoate hydrochloride **S14**

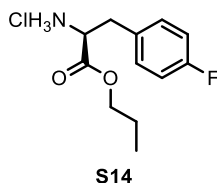

Thionyl chloride (600  $\mu$ l, 8.2 mmol, 1.5 equiv.) was added dropwise to a stirred, ice-cold suspension of (*S*)-Fluoro-phenylalanine **S13** (1.0 g, 5.5 mmol, 1.0 equiv.) in absolute *n*-propanol (24 ml). Afterwards the reaction mixture was heated at reflux for 3.5 h. After evaporation of the solvent under reduced pressure and no further purification the propyl ester **S14** could be obtained as a white solid (1.4 g, 5.5 mmol, quant.).

**<sup>1</sup>H-NMR** (400 MHz, DMSO-*d*<sub>6</sub>):  $\delta$  = 8.52 (s, 3H), 7.32-7.27 (m, 2H), 7.20-7.14 (m, 2H), 4.28 (t, *J* = 6.9 Hz, 1H), 4.02 (t, *J* = 6.6 Hz, 2H), 3.16 (dd, *J* = 14.1, 8.2 Hz, 1H), 3.06 (dd, *J* = 14.1, 7.9 Hz, 1H), 1.55-1.46 (m, 2H), 0.79 (t, *J* = 7.4 Hz, 3H).

**<sup>13</sup>C-NMR** (101 MHz, DMSO-*d*<sub>6</sub>):  $\delta$  = 169.0, 161.5 (d, *J* = 242.8 Hz), 131.4 (d, *J* = 8.4 Hz), 130.8 (d, *J* = 3.1 Hz), 115.35 (d, *J* = 21.4 Hz), 67.1, 53.1, 35.2, 21.2, 10.1.

**<sup>19</sup>F-NMR** (377 MHz, DMSO-*d*<sub>6</sub>):  $\delta$  = -115.60.

**HRMS** (ESI): [M+Na]<sup>+</sup>, calcd for C<sub>12</sub>H<sub>16</sub>FNO<sub>2</sub>Na<sup>+</sup>: 248.1057, found: 248.1062.

**[ $\alpha$ ]**<sub>589</sub><sup>28</sup>: +55.60 (*c* = 0.25, CHCl<sub>3</sub>).

Propyl-(*S*)-2-((*S*)-2-((*tert*-butoxycarbonyl)amino)-3-(4-nitrophenyl)propanamido)-3-(4-fluorophenyl)propanoate **1f**

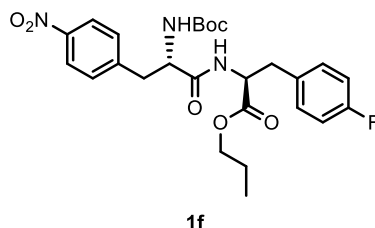

Synthesis of **1f** from **54** is based on the procedure by Wennerberg and co-workers.<sup>2</sup> To a round bottom flask charged with acetone (7 ml) was added carboxylic acid **54** (600.0 mg, 1.9 mmol, 1.0 equiv.), N-methylmorpholine (745  $\mu$ l, 6.8 mmol, 3.5 equiv.), hydrochloride salt **514** (517.2 mg, 2.0 mmol, 1.02 equiv.), HOBt·H<sub>2</sub>O (28.9 mg, 0.2 mmol, 0.1 equiv.), and EDC·HCl (200  $\mu$ l, 1.1 mmol, 1.1 equiv.). The resulting suspension was stirred at r.t. for 21 h. The solvent was removed under reduced pressure and replaced by EtOAc and water. Phases were allowed to separate after stirring for 5 min. The water phase was extracted with EtOAc (3x). The combined organic phases were washed with NaHCO<sub>3</sub> solution (sat.), NH<sub>4</sub>Cl solution (sat.), and brine. Purification by silica gel column chromatography (*n*-pentane:EtOAc = 2:1, dry loaded) yielded the dipeptide **1f** as a white solid (807.5 mg, 1.6 mmol, 81%).

<sup>1</sup>H-NMR (400 MHz, CDCl<sub>3</sub>):  $\delta$  = 8.13 (d, *J* = 8.7 Hz, 2H), 7.35 (d, *J* = 8.8 Hz, 2H), 7.05-7.00 (m, 2H), 6.97-6.91 (m, 2H), 6.29 (d, *J* = 7.7 Hz, 1H), 4.96 (d, *J* = 8.7 Hz, 1H), 4.74 (dd, *J* = 7.7, 6.1 Hz, 1H), 4.38-4.33 (m, 1H), 4.09-3.97 (m, 2H), 3.19 (dd, *J* = 13.9, 6.7 Hz, 1H), 3.11-2.99 (m, 3H), 1.60 (sext, *J* = 7.1 Hz, 2H), 1.41 (s, 9H), 0.90 (t, *J* = 7.4 Hz, 3H).

<sup>13</sup>C-NMR (101 MHz, CDCl<sub>3</sub>):  $\delta$  = 171.0, 170.1, 162.2 (d, *J* = 245.7 Hz), 155.3, 147.2, 144.4, 131.4 (d, *J* = 3.3 Hz), 130.9 (d, *J* = 8.0 Hz), 130.4, 123.9, 115.6 (d, *J* = 21.3 Hz), 80.8, 67.5, 55.5, 53.4, 38.3, 37.4, 28.4, 22.0, 10.4.

<sup>19</sup>F-NMR (377 MHz, CDCl<sub>3</sub>):  $\delta$  = -116.57.

HRMS (ESI): [M+Na]<sup>+</sup>, calcd for C<sub>26</sub>H<sub>32</sub>FN<sub>3</sub>O<sub>7</sub>Na<sup>+</sup>: 540.2116, found: 540.2112.

[ $\alpha$ ]<sub>589</sub><sup>28</sup>: +17.60 (*c* = 0.25, CHCl<sub>3</sub>).

**Melting point:** 157.5-158.5 °C.

Propyl-(*S*)-2-((*S*)-3-(4-aminophenyl)-2-((*tert*-butoxycarbonyl)amino)propanamido)-3-(4-fluorophenyl)propanoate **1c**

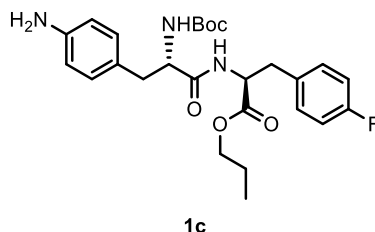

Synthesis of **1c** from **1f** is based on the procedure by Wennerberg and co-workers.<sup>2</sup> A round bottom flask containing a solution of nitro compound **1f** (300.0 mg, 0.6 mmol, 1.0 equiv.), and Pd/C (10% Pd loaded on C, 55% moist; 68.6 mg, 0.03 mmol, 5 mol%) in MeOH (12 ml) was charged with a H<sub>2</sub> balloon. The reaction was stirred for



1.5 h at r.t. while H<sub>2</sub> passed through the reaction mixture. Then, the suspension was filtered through a plug of Celite®. Removal of the solvent yielded the amine **1c** without further purification as a white solid (281.0 mg, 0.6 mmol, quant.).

<sup>1</sup>H-NMR (400 MHz, DMSO-*d*<sub>6</sub>): δ = 8.25 (d, *J* = 7.6 Hz, 1H), 7.27-7.24 (m, 2H), 7.08 (t, *J* = 8.9 Hz, 2H), 6.84 (d, *J* = 8.2 Hz, 2H), 6.67 (d, *J* = 8.7 Hz, 1H), 6.44 (d, *J* = 8.2 Hz, 2H), 4.84 (s, 2H), 4.46 (dd, *J* = 14.6, 7.6 Hz, 1H), 4.07-4.01 (m, 1H), 3.99-3.90 (m, 2H), 3.05-2.91 (m, 2H), 2.69 (dd, *J* = 13.9, 4.1 Hz, 1H), 2.52-2.46 (m, 1H, under solvent signal), 1.51 (sext, *J* = 7.0 Hz, 2H), 1.30 (s, 9H), 0.81 (t, *J* = 7.3 Hz, 3H).

<sup>13</sup>C-NMR (101 MHz, DMSO-*d*<sub>6</sub>): δ = 172.1, 171.3, 161.1 (d, *J* = 242.0 Hz), 155.1, 146.9, 133.2 (d, *J* = 2.5 Hz), 131.0 (d, *J* = 7.9 Hz), 129.5, 124.8, 114.9 (d, *J* = 21.0 Hz), 113.6, 77.9, 66.0, 55.9, 53.5, 36.7, 35.9, 28.1, 21.4, 10.2.

<sup>19</sup>F-NMR (377 MHz, DMSO-*d*<sub>6</sub>): δ = -116.65.

HRMS (ESI): [M+Na]<sup>+</sup>, calcd for C<sub>26</sub>H<sub>34</sub>FN<sub>3</sub>O<sub>5</sub>Na<sup>+</sup>: 510.2375, found: 510.2392.

[α]<sub>589</sub><sup>28</sup>: +40.40 (*c* = 0.25, CHCl<sub>3</sub>).

Melting point: 96.7-98.0 °C.

Propyl-(*S*)-2-((*S*)-3-(4-(bis(2-chloroethyl)amino)phenyl)-2-((*tert*-butoxycarbonyl)amino)propanamido)-3-(4-fluorophenyl)propanoate **1a**

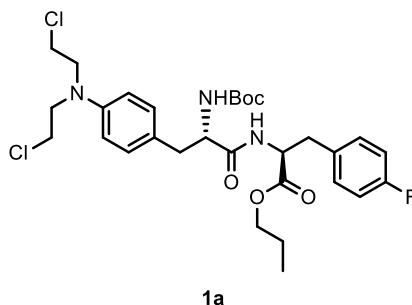

Synthesis of **1a** from **1c** is based on the procedure by Wennerberg and co-workers.<sup>2</sup> To a round bottom flask containing THF (5.1 ml) was added amine **1c** (500.0 mg, 1.03 mmol, 1.0 equiv.). After decreasing the temperature to 0 °C monochloroacetic acid (2.52 g, 26.7 mmol, 26.0 equiv.) and sodium monochloroacetate (1.2 g, 10.3 mmol, 10.0 equiv.) were added portion wise after each other. Borane dimethylsulfide (1.3 ml, 13.3 mmol, 13.0 equiv.) was added dropwise over 30 min at 0 °C. After stirring for further 1 h at 0 °C the cooling bath was removed and the reaction mixture was stirred for 2 h at r.t. Then, the reaction mixture was cooled to 0 °C again, quenched by slow addition of NaHCO<sub>3</sub> solution (sat.) and EtOAc. After stirring for 2 h at 0 °C the phases were separated and the water phase was extracted with DCM (3x). The combined organic phases were washed with NH<sub>4</sub>Cl solution (sat.) and brine. After removal of the solvent silica gel column chromatography (n-pentane:EtOAc = 2:1, dry loaded) yielded the alkylator **1a** as a white solid (475.3 mg, 0.78 mmol, 76%).

<sup>1</sup>H-NMR (400 MHz, CDCl<sub>3</sub>): δ = 7.06 (d, *J* = 8.5 Hz, 2H), 7.00-6.90 (m, 4H), 6.60 (d, *J* = 8.6 Hz, 2H), 6.32 (d, *J* = 7.7 Hz, 1H), 4.97-4.88 (m, 1H), 4.78-4.74 (m, 1H), 4.31-4.22 (m, 1H), 4.08-3.95 (m, 2H), 3.72-3.68 (m, 4H), 3.62-3.58 (m, 4H), 3.09-2.99 (m, 2H), 2.96-2.91 (m, 2H), 1.60 (sext, *J* = 7.3 Hz, 2H), 1.41 (s, 9H), 0.89 (t, *J* = 7.4 Hz, 3H).

**<sup>13</sup>C-NMR** (101 MHz, CDCl<sub>3</sub>):  $\delta$  = 171.1, 171.1, 162.1 (d,  $J$  = 245.3 Hz), 155.4, 145.2, 131.7 (d,  $J$  = 3.3 Hz), 131.0 (d,  $J$  = 7.9 Hz), 130.8, 125.4, 115.5 (d,  $J$  = 21.2 Hz), 112.4, 80.4, 67.3, 56.0, 53.6, 53.4, 40.6, 37.4, 37.3, 28.4, 22.0, 10.4.

**<sup>19</sup>F-NMR** (377 MHz, CDCl<sub>3</sub>):  $\delta$  = -115.69.

**HRMS** (ESI): [M+Na]<sup>+</sup>, calcd for C<sub>30</sub>H<sub>40</sub>Cl<sub>2</sub>FN<sub>3</sub>O<sub>5</sub>Na<sup>+</sup>: 634.2221, found: 634.2243.

**[ $\alpha$ ]<sub>589</sub><sup>28</sup>**: +27.60 ( $c$  = 0.25, CHCl<sub>3</sub>).

**Melting point**: 138.0-138.5 °C.

### 3.2. Synthesis of Propyl Melflufen Analogue **1d**

Propyl-(*S*)-2-((*S*)-2-((*tert*-butoxycarbonyl)amino)-3-(4-(diethylamino)phenyl)propanamido)-3-(4-fluorophenyl)propanoate **1d**

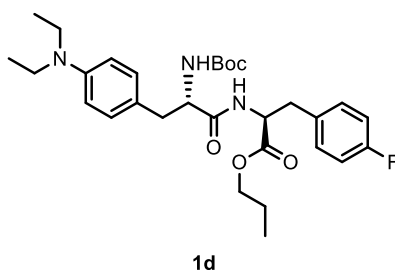

Synthesis of **1d** from **1c** is based on the procedure by Wennerberg and co-workers.<sup>2</sup> To a round bottom flask containing THF (3 ml) was added amine **1c** (100.0 mg, 0.2 mmol, 1.0 equiv.). After decreasing the temperature to 0 °C acetic acid (320.2 g, 5.3 mmol, 26.0 equiv.) and sodium acetate (168.3 mg, 2.1 mmol, 10.0 equiv.) were added portion wise after each other. Borane dimethylsulfide (267  $\mu$ l, 2.7 mmol, 13.0 equiv.) was added dropwise over 30 min at 0 °C. After stirring for further 1 h at 0 °C the cooling bath was removed and the reaction mixture was stirred for 48 h at r.t. Then, the reaction mixture was cooled to 0 °C again, quenched by slow addition of NaHCO<sub>3</sub> solution (sat.) and EtOAc. After stirring for 2 h at 0 °C the phases were separated and the water phase was extracted with DCM (3x). The combined organic phases were washed with NH<sub>4</sub>Cl solution (sat.) and brine. After removal of the solvent silica gel column chromatography (<sup>n</sup>pentane:EtOAc = 2:1, dry loaded) yielded the tertiary amine **1d** as a white solid (93.1 mg, 0.17 mmol, 84%).

**<sup>1</sup>H-NMR** (400 MHz, CDCl<sub>3</sub>):  $\delta$  = 7.02 (d,  $J$  = 8.2 Hz, 2H), 6.96-6.87 (m, 4H), 6.60 (d,  $J$  = 8.5 Hz, 2H), 6.37 (d,  $J$  = 7.7 Hz, 1H), 4.94 (bs, 1H), 4.78-4.74 (m, 1H), 4.27 (s, 1H), 4.06-3.93 (m, 2H), 3.31 (q,  $J$  = 7.0 Hz, 4H), 3.07-2.97 (m, 3H), 2.87 (dd,  $J$  = 14.2, 6.4 Hz, 1H), 1.58 (sext,  $J$  = 7.1 Hz, 2H), 1.41 (s, 9H), 1.13 (t,  $J$  = 7.0 Hz, 6H), 0.87 (t,  $J$  = 7.4 Hz, 3H).

**<sup>13</sup>C-NMR** (101 MHz, CDCl<sub>3</sub>):  $\delta$  = 171.3, 171.0, 162.0 (d,  $J$  = 245.1 Hz), 155.5, 147.0, 131.7 (d,  $J$  = 3.3 Hz), 130.9 (d,  $J$  = 8.0 Hz), 130.4, 122.6, 115.4 (d,  $J$  = 21.2 Hz), 112.1, 80.2, 67.1, 56.0, 53.5, 44.4, 37.4, 37.2, 28.4, 21.9, 12.7, 10.4.

**<sup>19</sup>F-NMR** (377 MHz, CDCl<sub>3</sub>):  $\delta$  = -115.89.

**HRMS** (ESI): [M+Na]<sup>+</sup>, calcd for C<sub>30</sub>H<sub>42</sub>FN<sub>3</sub>O<sub>5</sub>Na<sup>+</sup>: 566.3001, found: 566.2996.

$[\alpha]_{589}^{27}$ : +46.20 ( $c = 0.25$ ,  $\text{CHCl}_3$ ).

**Melting point:** 117.0-117.3 °C.

### 3.3. Synthesis of Additive Propyl Meflufen Analogue 1e

Propyl-(*S*)-2-((*S*)-2-((*tert*-butoxycarbonyl)amino)-3-(4-((*tert*-butoxycarbonyl)amino)phenyl) propanamido)-3-(4-fluorophenyl)propanoate **1e**

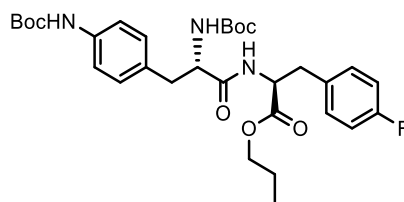

**1e**

To a solution of amine **1c** (70.0 mg, 0.1 mmol, 1.0 equiv.) in DCM (287  $\mu\text{l}$ ) were added Boc-anhydride (37  $\mu\text{l}$ , 0.12 mmol, 1.2 equiv.) and TEA (60  $\mu\text{l}$ , 0.3 mmol, 3.0 equiv.) at r.t. The reaction mixture was stirred for 16 h at r.t. After completion the solvent was removed under reduced pressure. Purification by silica gel column chromatography ( $^n$ pentane:EtOAc = 9:1, dry loaded) yielded the Boc-protected amine **1e** as a white solid (83.5 mg, 0.14 mmol, 99%).

**$^1\text{H-NMR}$**  (400 MHz,  $\text{CDCl}_3$ ):  $\delta = 7.27$  (d,  $J = 7.9$  Hz, 2H), 7.09 (d,  $J = 8.2$  Hz, 2H), 6.97-6.88 (m, 4H), 6.53 (s, 1H), 6.35 (d,  $J = 7.5$  Hz, 1H), 4.94 (bs, 1H), 4.73 (dd,  $J = 13.3, 6.2$  Hz, 1H), 4.30 (bs, 1H), 4.06-3.93 (m, 2H), 3.06-2.92 (m, 4H), 1.58 (sext,  $J = 7.2$  Hz, 2H), 1.50 (s, 9H), 1.40 (s, 9H), 0.87 (t,  $J = 7.2$  Hz, 3H).

**$^{13}\text{C-NMR}$**  (101 MHz,  $\text{CDCl}_3$ ):  $\delta = 171.0, 170.9, 162.1$  (d,  $J = 245.3$  Hz), 155.4, 152.8, 137.5, 131.6 (d,  $J = 3.2$  Hz), 131.0, 130.9 (d,  $J = 7.8$  Hz), 130.0, 118.8, 115.5 (d,  $J = 21.3$  Hz), 80.7, 80.4, 67.3, 55.9, 53.5, 37.6, 37.4, 28.4, 28.4, 21.9, 10.4.

**$^{19}\text{F-NMR}$**  (377 MHz,  $\text{CDCl}_3$ ):  $\delta = -115.73$ .

**HRMS** (ESI):  $[\text{M}+\text{Na}]^+$ , calcd for  $\text{C}_{31}\text{H}_{42}\text{FN}_3\text{O}_7\text{Na}^+$ : 610.2899, found: 610.2897.

$[\alpha]_{589}^{26}$ : +25.20 ( $c = 0.25$ ,  $\text{CHCl}_3$ ).

**Melting point:** 148.5-151.5 °C.

## 4. Synthesis and Characterisation of Fluorine-19 References

### 4.1. Synthesis of Fluorine-19 Reference **2b** for [<sup>18</sup>F]**2b**

The reference **2b** for <sup>18</sup>F-**2b** reaction was synthesised from **S13** according to the scheme shown down below. The synthesis of **S14** is described in [section 3.1](#).

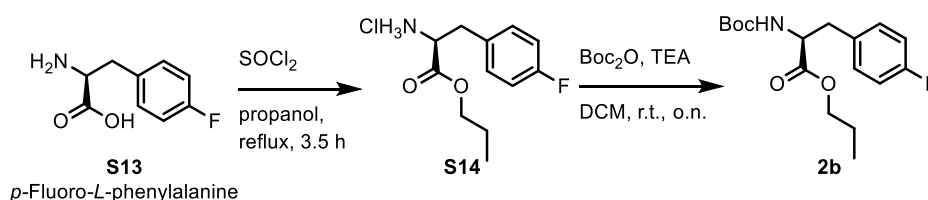

#### Propyl-(*S*)-2-((*tert*-butoxycarbonyl)amino)-3-(4-fluorophenyl)propanoate **2b**

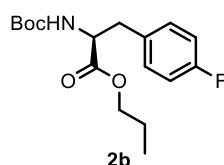

Boc-anhydride (207  $\mu$ l, 0.9 mmol, 1.2 equiv.) and triethylamine (320  $\mu$ l, 2.3 mmol, 3.0 equiv.) were added to a solution of hydrochloride salt **S14** (200.0 mg, 0.8 mmol, 1.0 equiv.) in DCM (1.5 ml, 0.5 M) at r.t. The reaction mixture was stirred for 16 h at r.t. and concentrated under reduced pressure. Column chromatography (*n*-pentane:EtOAc = 9:1) yielded the Boc-protected amine **2b** as a viscous oil (210.0 mg, 0.6 mmol, 85%).

<sup>1</sup>H-NMR (400 MHz, CDCl<sub>3</sub>):  $\delta$  = 7.12-7.08 (m, 2H), 6.97 (t, *J* = 8.2 Hz, 2H), 4.98 (d, *J* = 8.3 Hz, 1H), 4.55 (dd, *J* = 13.6, 6.5 Hz, 1H), 4.10-4.00 (m, 2H), 3.12-2.99 (m, 2H), 1.62 (sext, *J* = 7.1 Hz, 2H), 1.42 (s, 9H), 0.90 (t, *J* = 7.4 Hz, 3H).

<sup>13</sup>C-NMR (101 MHz, CDCl<sub>3</sub>):  $\delta$  = 172.0, 162.1 (d, *J* = 245.1 Hz), 155.2, 132.0 (d, *J* = 2.9 Hz), 131.0 (d, *J* = 8.0 Hz), 115.5 (d, *J* = 21.4 Hz), 80.1, 67.2, 54.6, 37.9, 28.4, 22.0, 10.5.

<sup>19</sup>F-NMR (377 MHz, CDCl<sub>3</sub>):  $\delta$  = -116.00.

HRMS (ESI): [M+Na]<sup>+</sup>, calcd for C<sub>17</sub>H<sub>24</sub>FNO<sub>4</sub>Na<sup>+</sup>: 348.1582, found: 348.1570.

[ $\alpha$ ]<sub>589</sub><sup>28</sup>: +34.00 (*c* = 0.25, CHCl<sub>3</sub>).

Melting point: 51.4-52.0 °C.

## 4.2. Synthesis of Fluorine-19 Reference 4a for [<sup>18</sup>F]4a

The fluorine-19 reference **4a** for radiotracer [<sup>18</sup>F]**4a** was synthesised from **S13** according to the scheme shown down below. The synthesis of **S14** and **S9** are described in [section 3.1](#) and [section 2.2.3](#), respectively.

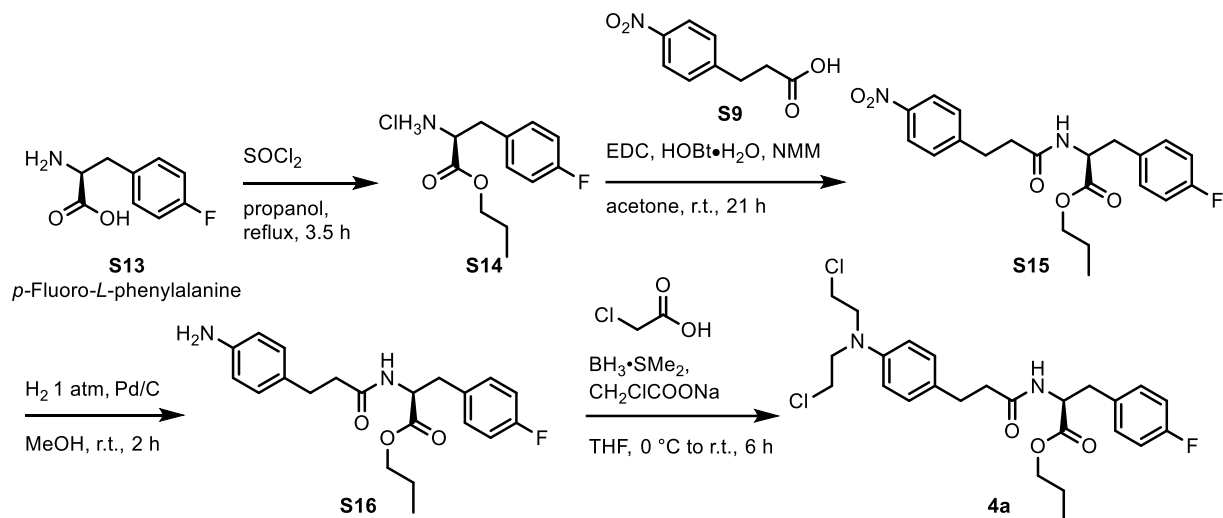

### Propyl-(S)-3-(4-fluorophenyl)-2-(3-(4-nitrophenyl)propanamido)propanoate **S15**

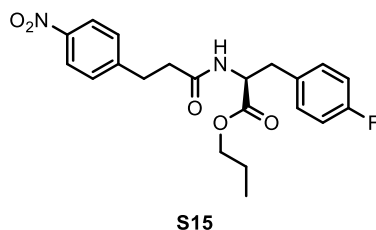

Synthesis of **S9** from **S15** is based on the procedure by Wennerberg and co-workers.<sup>2</sup> To a round bottom flask charged with acetone (5.7 ml) was added carboxylic acid **S9** (300.0 mg, 1.5 mmol, 1.0 equiv.), N-methylmorpholine (590  $\mu\text{l}$ , 5.4 mmol, 3.5 equiv.), hydrochloride salt **S14** (411.1 mg, 1.6 mmol, 1.02 equiv.), HOBt·H<sub>2</sub>O (23.0 mg, 0.2 mmol, 0.1 equiv.), and EDC·HCl (300  $\mu\text{l}$ , 1.7 mmol, 1.1 equiv.). The resulting suspension was stirred at r.t. for 21 h. The solvent was removed under reduced pressure and replaced by EtOAc and water. The phases were allowed to separate after stirring for 5 min. The water phase was extracted with EtOAc (3x). The combined organic phases were washed with NaHCO<sub>3</sub> solution (sat.), NH<sub>4</sub>Cl solution (sat.), and brine. Purification by silica gel column chromatography (<sup>n</sup>pentane:EtOAc = 2:1, dry loaded) yielded the dipeptide **S15** as a white solid (455.7 mg, 1.1 mmol, 74%).

<sup>1</sup>H-NMR (400 MHz, CDCl<sub>3</sub>):  $\delta$  = 8.14 (d,  $J$  = 8.7 Hz, 2H), 7.35 (d,  $J$  = 8.8 Hz, 2H), 6.97-6.90 (m, 4H), 5.86 (d,  $J$  = 7.6 Hz, 1H), 4.83 (dt,  $J$  = 7.7, 5.9 Hz, 1H), 4.11-4.00 (m, 2H), 3.10-3.00 (m, 4H), 2.59-2.45 (m, 2H), 1.63 (sext,  $J$  = 7.2 Hz, 2H), 0.91 (t,  $J$  = 7.5 Hz, 3H).

<sup>13</sup>C-NMR (101 MHz, CDCl<sub>3</sub>):  $\delta$  = 171.6, 170.6, 162.15 (d,  $J$  = 245.8 Hz), 148.6, 146.8, 131.6 (d,  $J$  = 3.3 Hz), 130.8 (d,  $J$  = 8.0 Hz), 123.9 115.5 (d,  $J$  = 21.3 Hz), 67.5, 53.3, 37.4, 37.2, 31.1, 22.0, 10.4.

<sup>19</sup>F-NMR (377 MHz, CDCl<sub>3</sub>):  $\delta$  = -116.58.

**HRMS** (ESI):  $[M+Na]^+$ , calcd for  $C_{21}H_{23}FN_2O_5Na^+$ : 425.1483, found: 425.1482.

$[\alpha]_{589}^{28}$ : +60.80 ( $c = 0.25$ ,  $CHCl_3$ ).

**Melting point**: 87.0-87.7 °C.

Propyl-(*S*)-2-(3-(4-aminophenyl)propanamido)-3-(4-fluorophenyl)propanoate **S16**

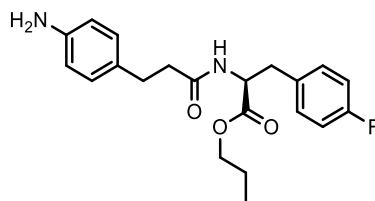

**S16**

Synthesis of **S16** from **S15** is based on the procedure by Wennerberg and co-workers.<sup>2</sup> A round bottom flask containing a solution of nitro compound **S15** (450.0 mg, 1.1 mmol, 1.0 equiv.), and Pd/C (10% Pd loaded on C, 55% moist; 108.5 mg, 0.06 mmol, 5 mol%) in MeOH (22 ml) was equipped with a H<sub>2</sub> balloon. The reaction was stirred for 2.0 h at r.t. while H<sub>2</sub> passed through the reaction mixture. Then, the suspension was filtered through a plug of Celite®. Removal of the solvent yielded the amine **S16** without further purification as a white solid (405.0 mg, 1.1 mmol, 97%).

**<sup>1</sup>H-NMR** (400 MHz, DMSO-*d*<sub>6</sub>):  $\delta = 8.26$  (d,  $J = 7.8$  Hz, 1H), 7.20 (dd,  $J = 8.6, 5.6$  Hz, 2H), 7.08 (t,  $J = 8.9$  Hz, 2H), 6.79 (d,  $J = 8.3$  Hz, 2H), 6.45 (d,  $J = 8.4$  Hz, 2H), 4.82 (s, 2H), 4.44-4.39 (m, 1H), 3.95 (t,  $J = 6.5$  Hz, 2H), 3.00-2.84 (m, 2H), 2.57-2.53 (m, 2H), 2.27 (t,  $J = 7.6$  Hz, 2H), 1.51 (sext,  $J = 7.6$  Hz, 2H), 0.82 (t,  $J = 7.4$  Hz, 3H).

**<sup>13</sup>C-NMR** (101 MHz, DMSO-*d*<sub>6</sub>):  $\delta = 171.7, 171.6, 161.1$  (d,  $J = 242.0$  Hz), 146.6, 133.4 (d,  $J = 3.1$  Hz), 130.9 (d,  $J = 8.0$  Hz), 128.5, 128.0, 114.9 (d,  $J = 21.1$  Hz), 113.9, 65.9, 53.6, 37.2, 35.9, 30.2, 21.4, 10.1.

**<sup>19</sup>F-NMR** (377 MHz,  $CDCl_3$ ):  $\delta = -116.62$ .

**HRMS** (ESI):  $[M+Na]^+$ , calcd for  $C_{21}H_{25}FN_2O_3Na^+$ : 395.1741, found: 395.1726.

$[\alpha]_{589}^{28}$ : +62.00 ( $c = 0.25$ ,  $CHCl_3$ ).

**Melting point**: 101.0-101.6 °C.

Propyl-(*S*)-2-(3-(4-(bis(2-chloroethyl)amino)phenyl)propanamido)-3-(4-fluorophenyl)propanoate **4a**

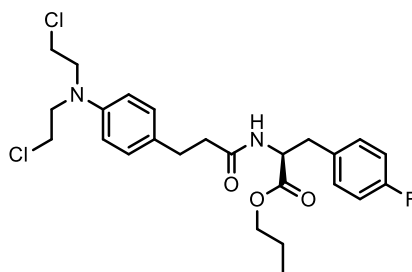

**4a**

Synthesis of **4a** from **S16** is based on the procedure by Wennerberg and co-workers.<sup>2</sup> To a round bottom flask containing THF (3.5 ml) was added amine **S16** (405.0 mg, 1.09 mmol, 1.0 equiv.). After decreasing the temperature to 0 °C monochloroacetic acid (2.67 g, 28.3 mmol, 26.0 equiv.) and sodium monochloroacetate (1.27 g, 10.9 mmol, 10.0 equiv.) were added in portions. Borane dimethylsulfide (1.4 ml, 14.1 mmol, 13.0 equiv.)

was added dropwise over 30 min at 0 °C. After stirring for further 1 h at 0 °C the cooling bath was removed and the reaction mixture was stirred for 2 h at r.t. Then, the reaction mixture was cooled to 0 °C again, quenched by slow addition of NaHCO<sub>3</sub> solution (sat.) and EtOAc. After stirring for 2 h at 0 °C the phases were separated and the water phase was extracted with DCM (3x). The combined organic phases were washed with NH<sub>4</sub>Cl solution (sat.) and brine. After removal of the solvent purification by silica gel column chromatography (<sup>n</sup>pentane:EtOAc = 2:1, dry loaded) yielded the alkylator **4a** as a white solid (383.2 mg, 0.77 mmol, 71%).

<sup>1</sup>H-NMR (400 MHz, CDCl<sub>3</sub>): δ = 7.08 (d, *J* = 8.6 Hz, 2H), 6.95-6.88 (m, 4H), 6.62 (d, *J* = 8.7 Hz, 2H), 5.85 (d, *J* = 7.7 Hz, 1H), 4.85 (dt, *J* = 7.7, 5.7 Hz, 1H), 4.11-3.99 (m, 2H), 3.72-3.68 (m, 4H), 3.62-3.58 (m, 4H), 3.09-3.01 (m, 2H), 2.92-2.79 (m, 2H), 2.52-2.37 (m, 2H), 1.63 (sext, *J* = 7.2 Hz, 2H), 0.91 (t, *J* = 7.4 Hz, 3H).

<sup>13</sup>C-NMR (101 MHz, CDCl<sub>3</sub>): δ = 171.8, 171.7, 162.1 (d, *J* = 245.2 Hz), 144.7, 131.7 (d, *J* = 3.2 Hz), 130.9 (d, *J* = 7.9 Hz), 129.9, 129.8, 115.5 (d, *J* = 21.3 Hz), 112.4, 67.3, 53.7, 53.2, 40.6, 38.6, 37.4, 30.5, 22.0, 10.5.

<sup>19</sup>F-NMR (377 MHz, CDCl<sub>3</sub>): δ = -115.69.

HRMS (ESI): [M+Na]<sup>+</sup>, calcd for C<sub>25</sub>H<sub>31</sub>Cl<sub>2</sub>FN<sub>2</sub>O<sub>3</sub>Na<sup>+</sup>: 519.1588, found: 519.1596.

[α]<sub>589</sub><sup>28</sup>: +54.80 (*c* = 0.25, CHCl<sub>3</sub>).

**Melting point:** 72.0-72.9 °C.

## 5. Radiochemical Studies

### 5.1. General Information

[<sup>18</sup>F]Fluoride was produced through bombardment of [<sup>18</sup>O]Oxygen-enriched water with protons by the <sup>18</sup>O(p,n)<sup>18</sup>F nuclear reaction in a cyclotron (Scanditronix MC-17). [<sup>18</sup>F]Fluoride was trapped on an anion exchange cartridge (quaternary methyl ammonium, Sep-Pak<sup>®</sup> Accell Plus QMA Light by Waters) after preconditioning with a K<sub>2</sub>CO<sub>3</sub> solution (10 ml, 0.5 M, aq.) and deionized water (10 ml). The radiofluorinated compounds were characterised by comparing the radio-HPLC signal with the UV-HPLC signal of an authentic <sup>19</sup>F-reference, which was synthesised as described in sections [3](#) and [4](#). Radiochemical conversions (RCC) were determined from a small aliquot of the reaction mixture by analytical radio HPLC (rHPLC). The analytical radio HPLC was performed with an Agilent 1260 Infinity II with a UV-detector (λ = 254 nm) in series with a Flow-Count PMT radioactivity detector system by Eckert & Ziegler using a small aliquot (~10 μl) diluted in a solution of MeCN:H<sub>2</sub>O = 1:1 (~500 μl). The analysis was performed using a C-18 reversed phase column (Phenomenex, Kinetex 2.6μ, 100 Å, 100x4.6 mm) and an eluent gradient system of ammonium formate (50 mM aq.)/MeCN (1.5 ml/min flow; linear increase 30% to 90% MeCN 0-10 min; isocratic 10-12 min; linear decrease 90% to 30% MeCN 12-13 min).

### 5.2. Preparation of [<sup>18</sup>F]KF/K<sub>222</sub>

[<sup>18</sup>F]Fluoride was separated from [<sup>18</sup>O]oxygen-enriched water by trapping on a cartridge (quaternary methyl ammonium, Sep-Pak<sup>®</sup> Accell Plus QMA Light by Waters) and subsequently released as [<sup>18</sup>F]KF/K<sub>222</sub> using a 4:1 solution of MeCN:H<sub>2</sub>O (3 mg K<sub>2</sub>CO<sub>3</sub> and 15 mg K<sub>222</sub> per 1 mL of solution). 550 μL of the prepared solution was

directly eluted through the cartridge into a 5 ml V-shaped vial. Azeotropic drying was performed in five cycles using 200  $\mu\text{L}$  of MeCN in two-minute intervals at 120  $^{\circ}\text{C}$  under a flow of  $\text{N}_2$ . After the last drying interval, the cylinder was allowed to warm up to r.t. for 5 min under a flow of  $\text{N}_2$ . The obtained  $[^{18}\text{F}]\text{KF}/\text{K}_{222}$  was redissolved in dry MeCN (300 – 1000  $\mu\text{l}$ ).

### 5.3. Fluorine-18 Labelling of Phenylalanine derivative **2a** (Table 1)

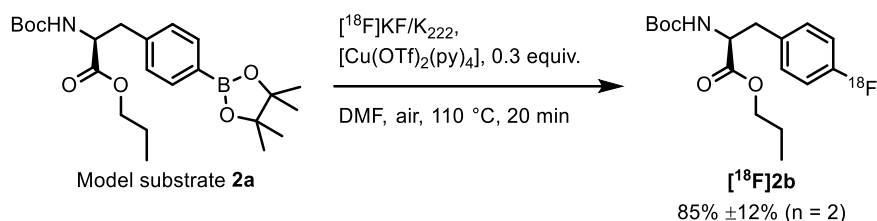

Unless otherwise stated, a dry 1 ml V-shaped vial containing a magnetic stirring bar was charged with substrate **2a** (30  $\mu\text{mol}$ , 1.0 equiv.), the Cu mediator  $[\text{Cu}(\text{OTf})_2(\text{py})_4]$  (9  $\mu\text{mol}$ , 0.3 equiv.). The vial was sealed and purged with  $\text{N}_2$  ( $\sim 10$  s) before addition of dry DMF (150  $\mu\text{l}$ ). It was stirred vigorously until all components were dissolved ( $\sim 30$  s). A solution of  $[^{18}\text{F}]\text{KF}/\text{K}_{222}$  in dry MeCN ( $\sim 300$  MBq in  $\sim 30$   $\mu\text{l}$ ) was added through the septum to the reaction mixture before it was heated and stirred at 110  $^{\circ}\text{C}$  for 20 min. An aliquot ( $\sim 10$   $\mu\text{l}$ ) was removed and added to a solution of MeCN:H<sub>2</sub>O = 1:1 ( $\sim 500$   $\mu\text{l}$ ) for radio HPLC analysis.

### 5.4. Functional Group Tolerance Test (Figure 3)

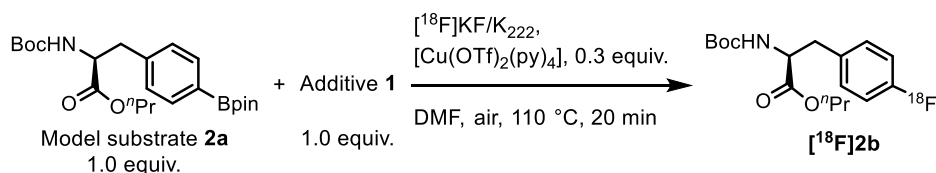

A dry 1 ml V-shaped vial containing a magnetic stirring bar was charged with **2a** (30  $\mu\text{mol}$ , 1.0 equiv.), Cu mediator  $[\text{Cu}(\text{OTf})_2(\text{py})_4]$  (9  $\mu\text{mol}$ , 0.3 equiv.), additive **1** (30  $\mu\text{mol}$ , 1.0 equiv.) and with dry DMF (150  $\mu\text{l}$ ). The vial was sealed under air and stirred vigorously until all components were dissolved ( $\sim 30$  s). A solution of  $[^{18}\text{F}]\text{KF}/\text{K}_{222}$  in dry MeCN ( $\sim 300$  MBq in  $\sim 30$   $\mu\text{l}$ ) was added through the septum to the reaction mixture before it was heated and stirred at 110  $^{\circ}\text{C}$  for 20 min. An aliquot ( $\sim 10$   $\mu\text{l}$ ) was removed and added to a solution of MeCN:H<sub>2</sub>O = 1:1 ( $\sim 500$   $\mu\text{l}$ ) for radio HPLC analysis.



## 5.5. Fluorine-18 Labelling of Meflufen Analogues 3 (Scheme 1)

### General Procedure for Fluorine-18 Labelling of Meflufen Analogues 3 (Scheme 1)

Unless otherwise stated, a dry 1 ml V-shaped vial containing a magnetic stirring bar was charged with the pinacol boronate precursor (30  $\mu\text{mol}$ , 1.0 equiv.), the Cu mediator  $[\text{Cu}(\text{OTf})_2(\text{py})_4]$  (3  $\mu\text{mol}$ , 0.1 equiv.) and subsequently with dry DMF (150  $\mu\text{l}$ ). The vial was sealed under an atmosphere of ambient air and stirred vigorously until all components were dissolved ( $\sim 30$  s). A solution of  $^{18}\text{F}]\text{KF}/\text{K}_{222}$  in dry MeCN ( $\sim 300$  MBq in  $\sim 30$   $\mu\text{l}$ ) was added through the septum to the reaction mixture before it was heated and stirred at 110  $^\circ\text{C}$  for 20 min. An aliquot ( $\sim 10$   $\mu\text{l}$ ) was removed and added to a solution of MeCN:H<sub>2</sub>O = 1:1 ( $\sim 500$   $\mu\text{l}$ ) for radio HPLC analysis.

## 5.6. Examination of the Role of Additive in the Synthesis of Meflufen Propyl Ester Radiotracer $^{18}\text{F}]\mathbf{1a}$ and $^{18}\text{F}]\mathbf{4a}$ (Figure 4)

### General Procedure for Synthesis of Meflufen Propyl Ester Radiotracer $^{18}\text{F}]\mathbf{1a}$ and $^{18}\text{F}]\mathbf{4a}$ in the presence of Additives (Figure 4)

A dry 1 ml V-shaped vial containing a magnetic stirring bar was charged with meflufen pinacol boronate analogue **3a/3f** (30  $\mu\text{mol}$ , 1.0 equiv.), Cu mediator  $[\text{Cu}(\text{OTf})_2(\text{py})_4]$  (3  $\mu\text{mol}$ , 0.1 equiv.), additive **5** (0.05-1.0 equiv.) and with dry DMF (150  $\mu\text{l}$ ). The vial was sealed under air and stirred vigorously until all components were dissolved ( $\sim 30$  s). A solution of  $^{18}\text{F}]\text{KF}/\text{K}_{222}$  in dry MeCN ( $\sim 300$  MBq in  $\sim 30$   $\mu\text{l}$ ) was added through the septum to the reaction mixture before it was heated and stirred at 110  $^\circ\text{C}$  for 20 min. An aliquot ( $\sim 10$   $\mu\text{l}$ ) was removed and added to a solution of MeCN:H<sub>2</sub>O = 1:1 ( $\sim 500$   $\mu\text{l}$ ) for radio HPLC analysis.

## 5.7. Radiosynthesis and Isolation of Meflufen Propyl Ester Analogue Radiotracer $^{18}\text{F}]\mathbf{1a}$

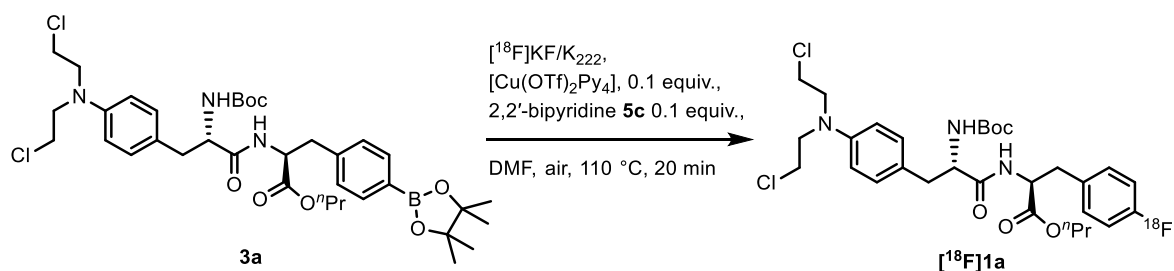

A dry 1 ml V-shaped vial containing a magnetic stirring bar was charged with the meflufen pinacol boronate analogue **3a** (30  $\mu\text{mol}$ , 1.0 equiv.), the Cu mediator  $[\text{Cu}(\text{OTf})_2(\text{py})_4]$  (3  $\mu\text{mol}$ , 0.1 equiv.), the 2,2'-bipyridine (**5c**) (3  $\mu\text{mol}$ , 0.1 equiv.) and subsequently with dry DMF (150  $\mu\text{l}$ ). The vial was sealed under air and stirred vigorously until all components were dissolved ( $\sim 30$  s). A solution of  $^{18}\text{F}]\text{KF}/\text{K}_{222}$  (3.4 GBq) in dry MeCN ( $\sim 30$   $\mu\text{l}$ ) was added through the septum to the reaction mixture, then it was heated and stirred at 110  $^\circ\text{C}$  for 20 min. An aliquot

(~10  $\mu\text{l}$ ) was removed and added to a solution of MeCN:H<sub>2</sub>O = 1:1 (~500  $\mu\text{l}$ ) for analytical radio HPLC analysis (38% RCC).

The crude reaction mixture was purified by semi-preparative HPLC using a C-18 reversed phase column (ACE, ACE 5 SuperC18, 150x10 mm) and an eluent gradient system of ammonium formate (50 mM aq.)/MeCN (5.0 ml/min flow; linear increase 10% to 50% MeCN 0-15 min; isocratic 15-20 min; linear increase 50% to 90% MeCN 20-35 min; isocratic 35-40 min). Radiotracer [<sup>18</sup>F]**1a** was collected in a fraction over 23 s with a retention time of  $t_R = 34.5$  min.

Radiotracer [<sup>18</sup>F]**1a** was obtained with an activity of 50 MBq, an activity yield AY = 1.5 %, a molar activity  $A_m = 2940$  GBq/ $\mu\text{mol}$  and a radiochemical purity RCP = 100%.

Radiotracer [<sup>18</sup>F]**1a** was characterised by comparing the radio-HPLC signal with the UV-HPLC signal of an authentic <sup>19</sup>F-reference (Figure S1).

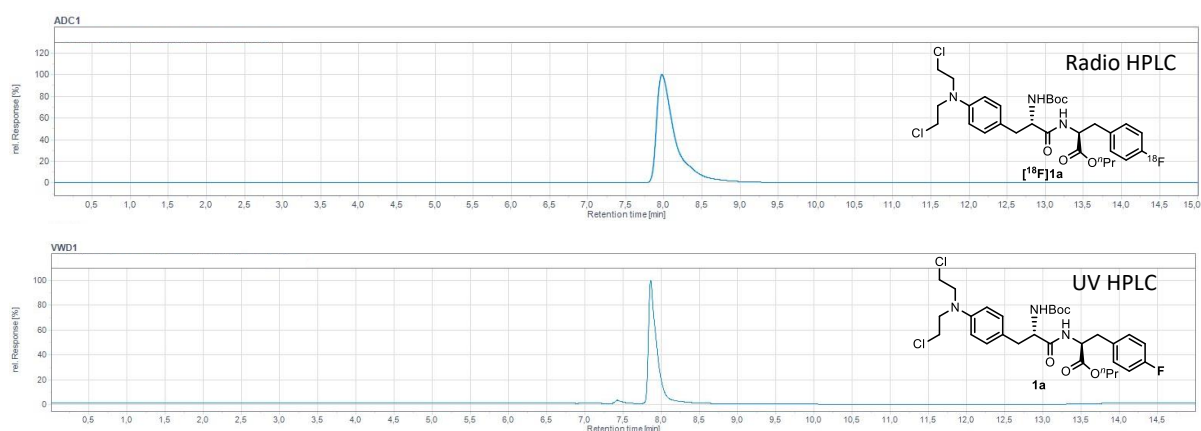

**Figure S1.** Radio-HPLC of [<sup>18</sup>F]**1a** and UV-HPLC of authentic <sup>19</sup>-fluorine reference **1a**.

### Calibration Curve Melflufen Propyl Ester Analogue **1a**

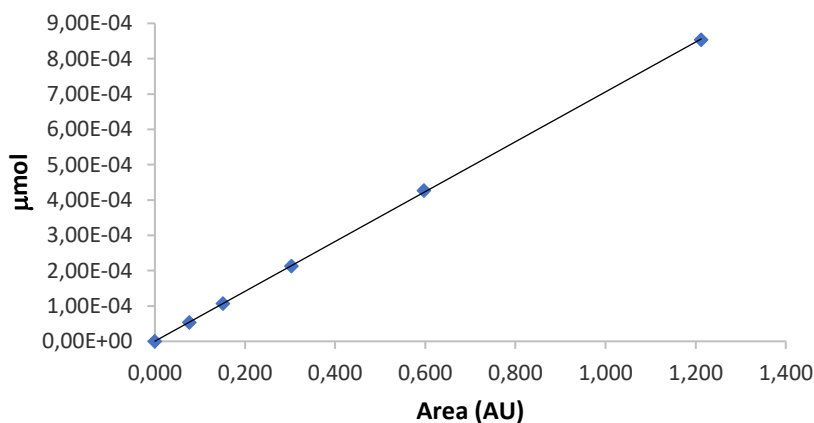

**Figure S2.** Calibration curve of **1a** for the determination of molar activity.

**Table S 1.** Data of calibration curve of **1a** (Figure S2).

| Injection | Concentration [ $\mu\text{mol}/\mu\text{l}$ ] | Area [AU] | Injected amount [mmol] |
|-----------|-----------------------------------------------|-----------|------------------------|
| 1         | $9,48 \cdot 10^{-6}$                          | 1,212324  | $8,54 \cdot 10^{-4}$   |
| 2         | $4,74 \cdot 10^{-6}$                          | 0,597181  | $4,27 \cdot 10^{-4}$   |
| 3         | $2,37 \cdot 10^{-6}$                          | 0,303031  | $2,13 \cdot 10^{-4}$   |
| 4         | $1,19 \cdot 10^{-6}$                          | 0,151382  | $1,07 \cdot 10^{-4}$   |
| 5         | $5,93 \cdot 10^{-7}$                          | 0,076885  | $5,33 \cdot 10^{-4}$   |

## 6. References

1. M. Hebel, A. Riegger, M. M. Zegota, G. Kizilsavas, J. Gačanin, M. Pieszka, T. Lückerrath, J. A. S. Coelho, M. Wagner, P. M. P. Gois, D. Y. W. Ng and Tanja Weil, *J. Am. Chem. Soc.*, 2019, **141** (36), 14026.
2. H. Cotton, B. Bäckström, I. Fritzon, F. Lehmann, T. Monemi, V. Oltner, E. Sölver, N. Wahlström and J. Wennerberg, *Org. Process Res. Dev.*, 2019, **23** (6), 1191.
3. S. Trofymchuk, A. Bezdudny, Y. Pustovit and P. K. Mykhailiuk, *Journal of Fluorine Chemistry*, 2015, **171**, 174.

## 7. Appendix

### 7.1. NMR Spectra

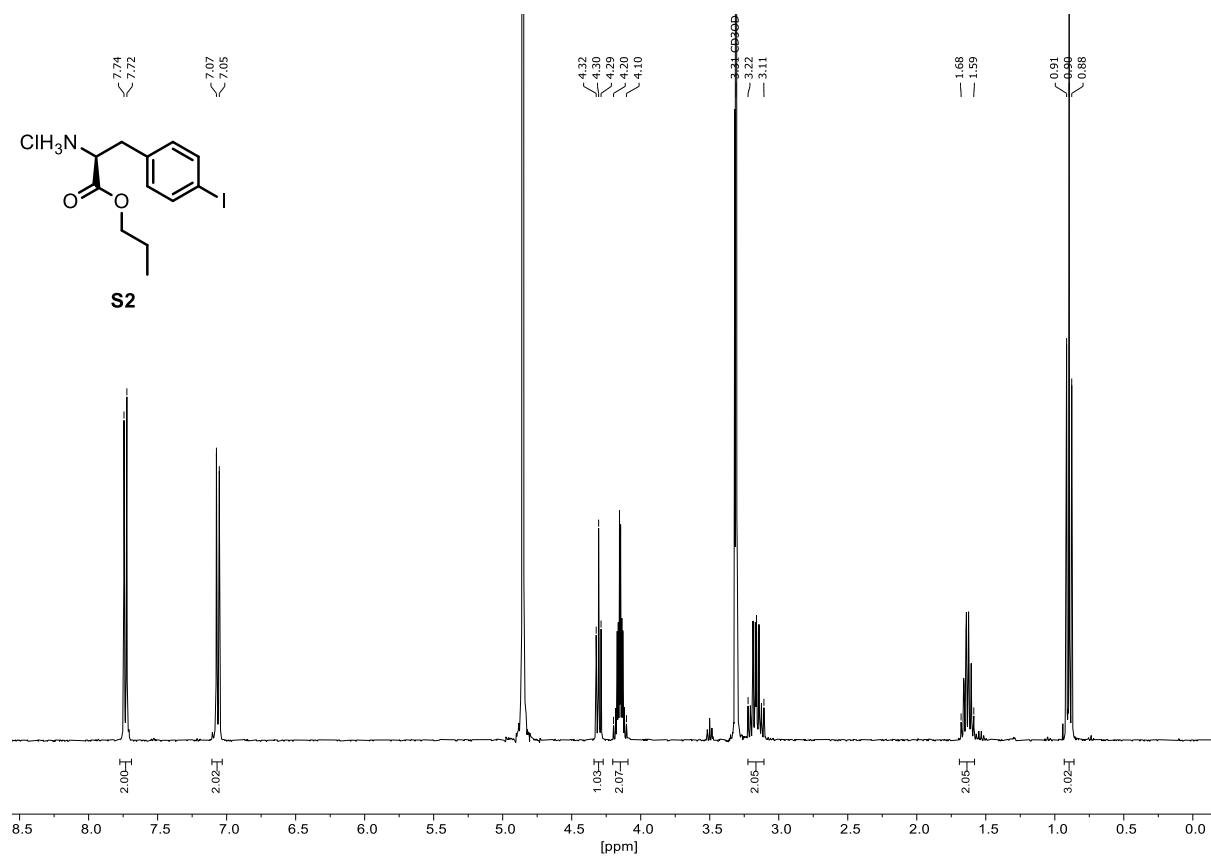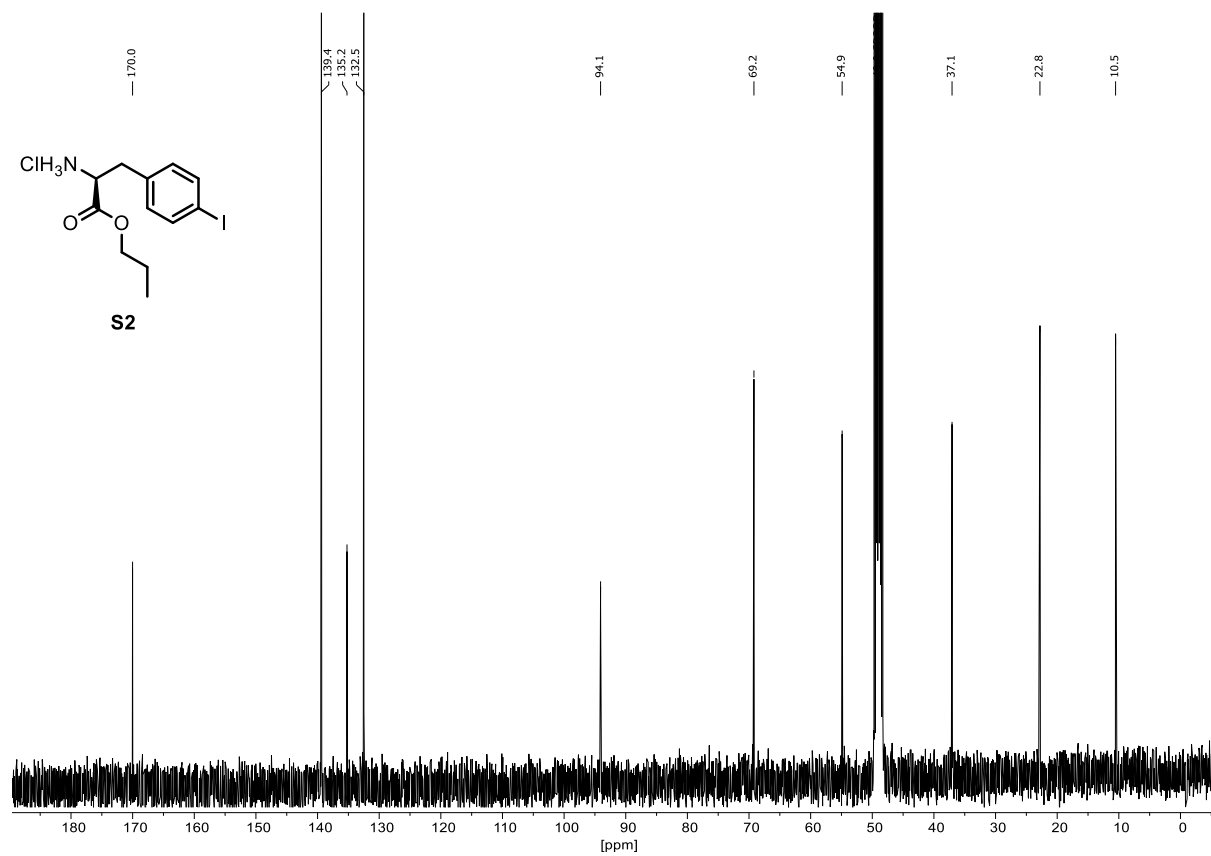

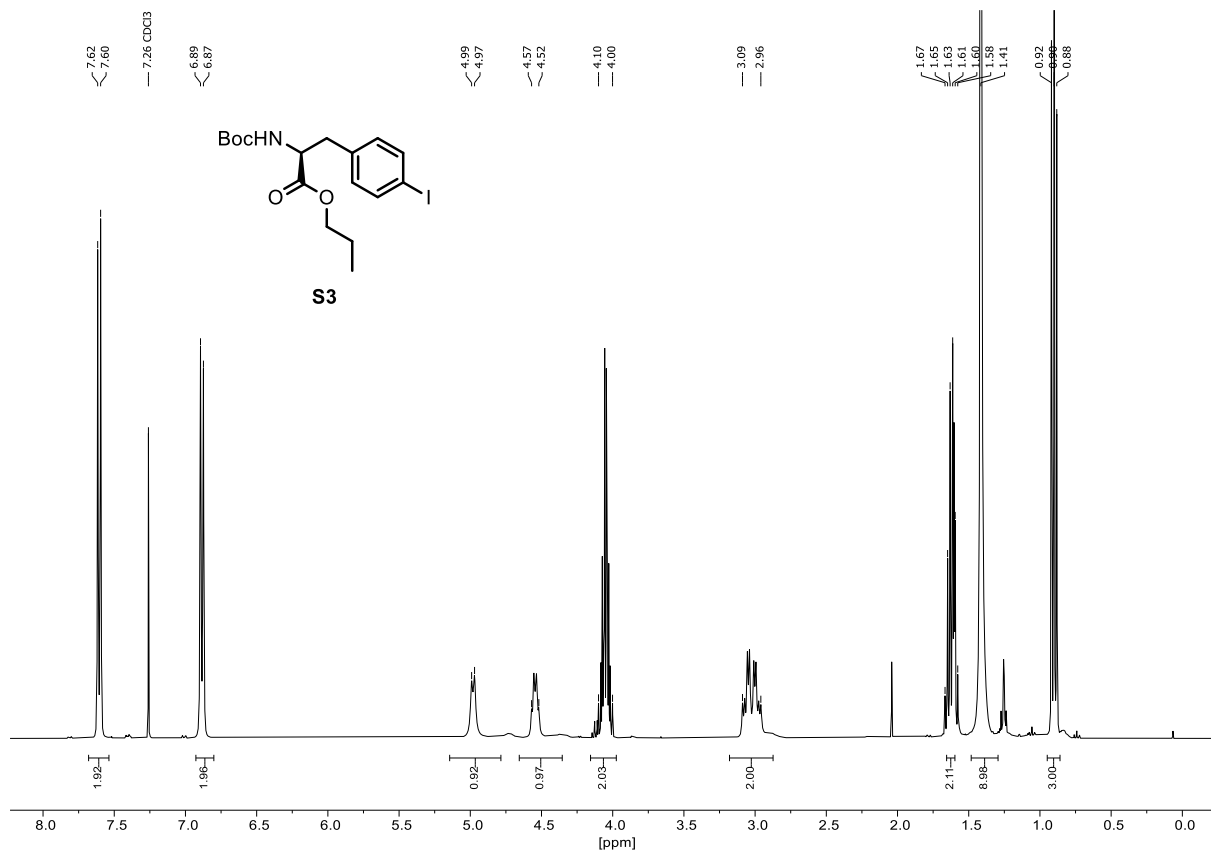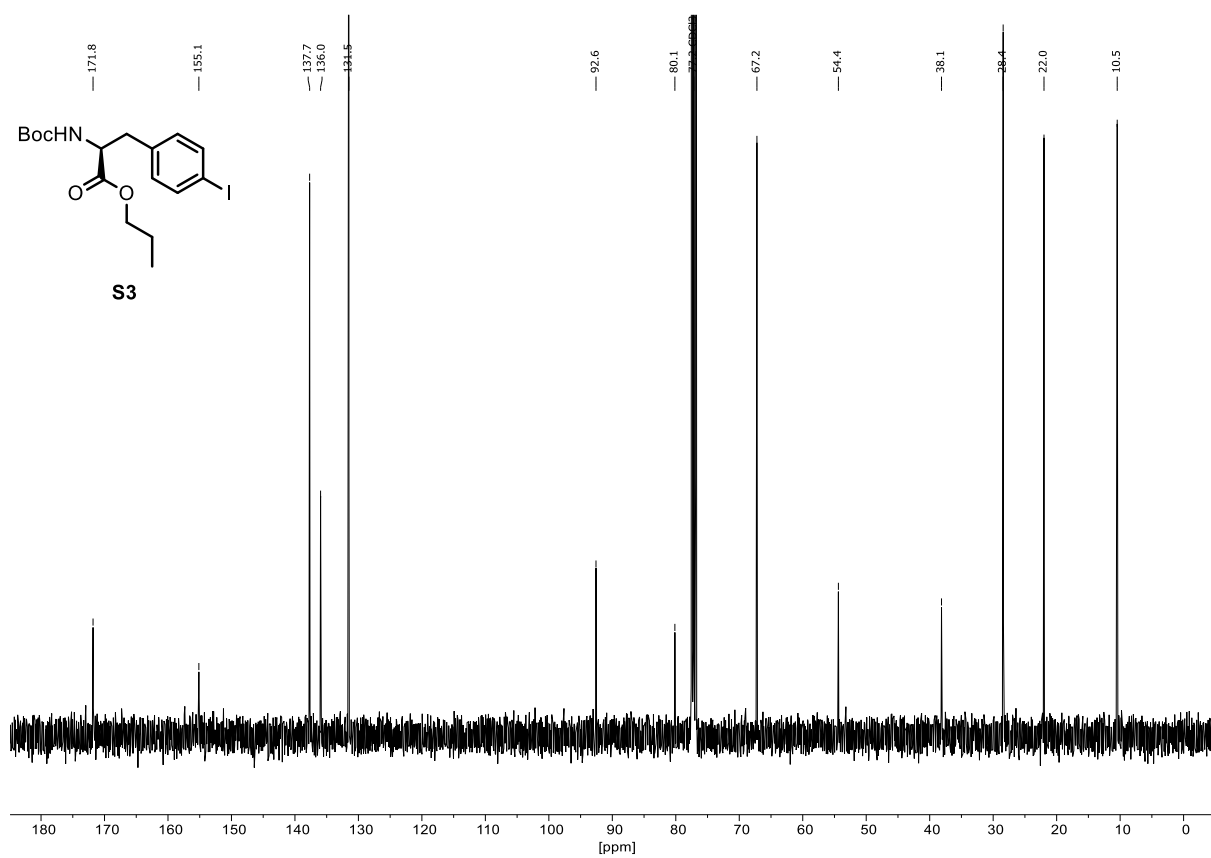

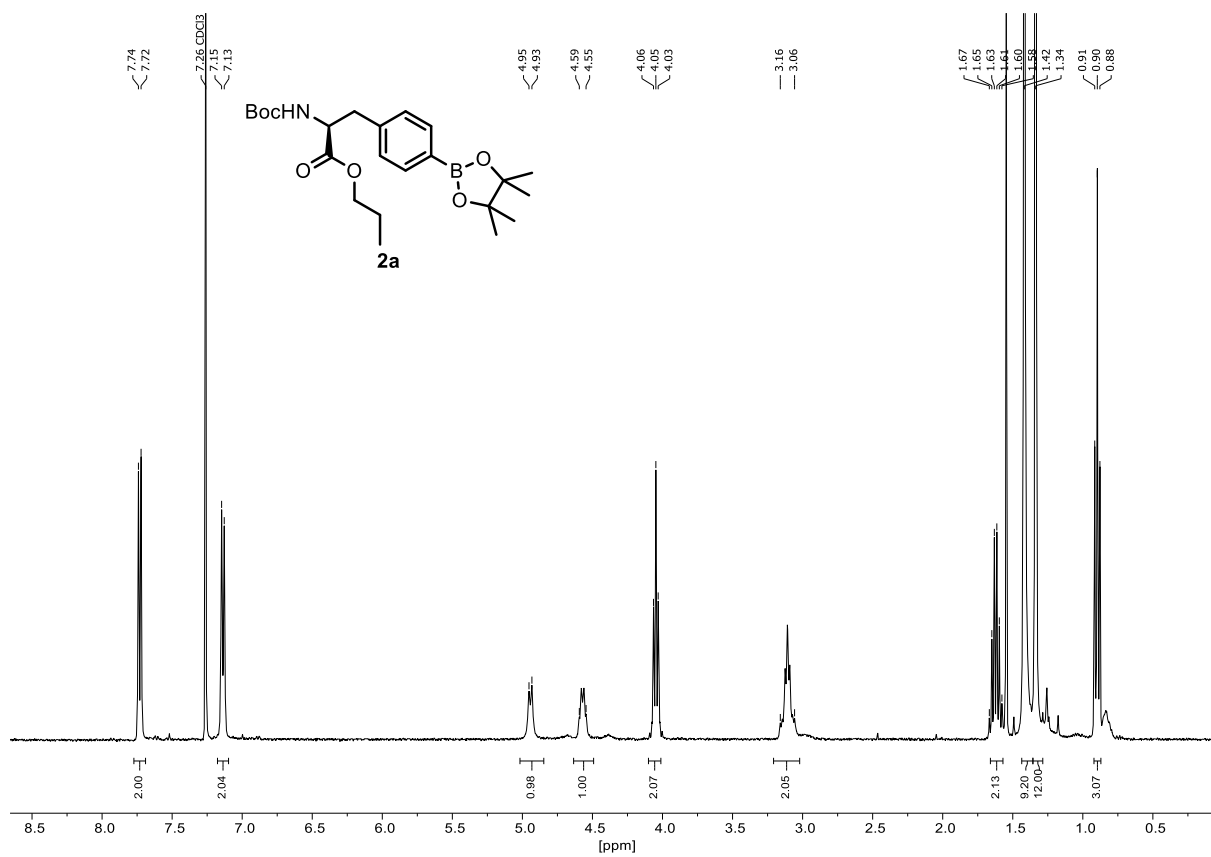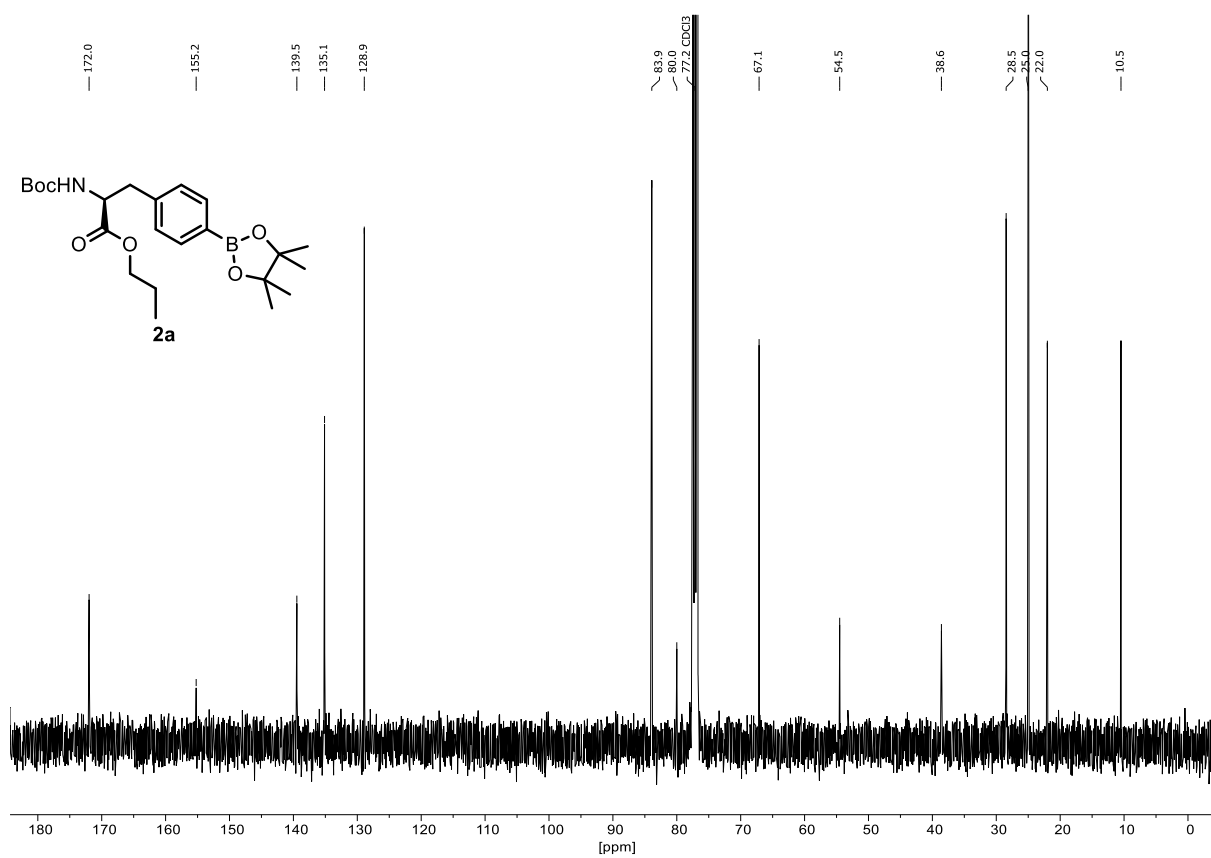

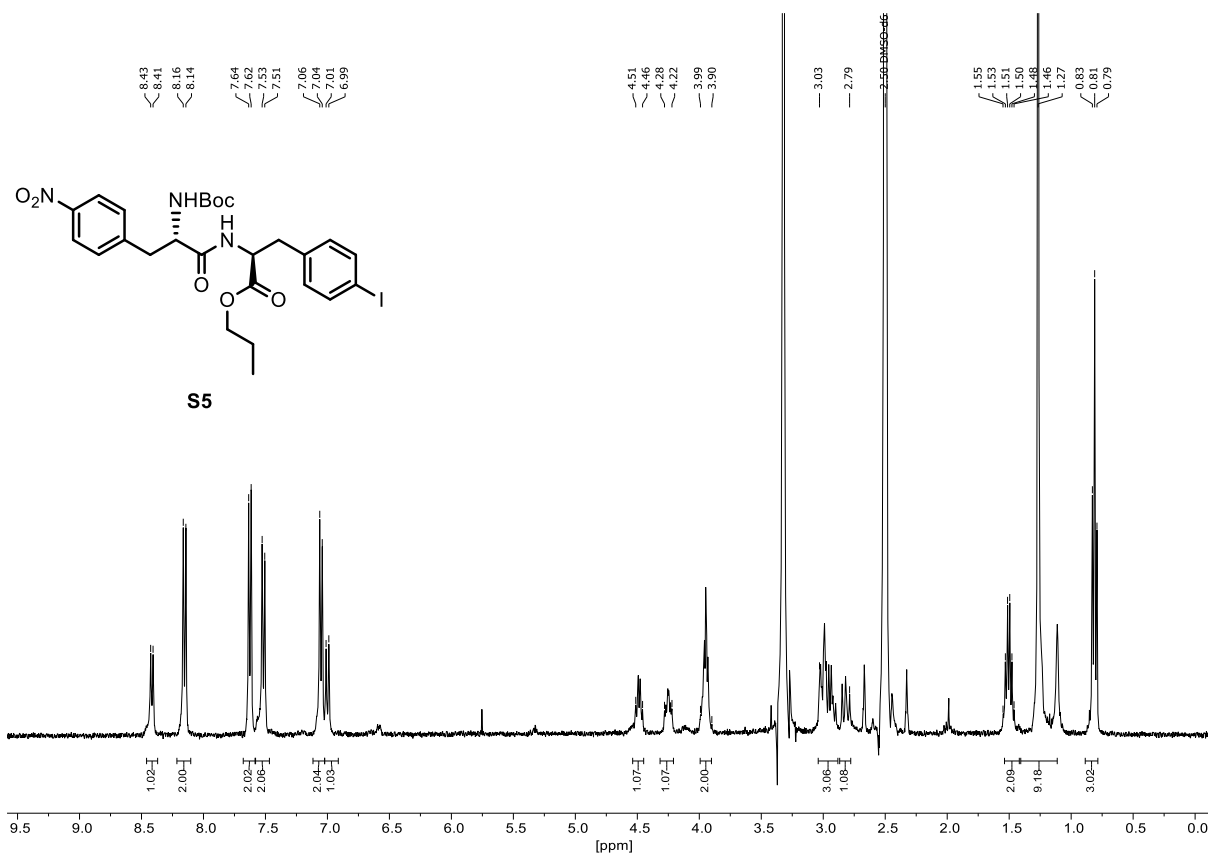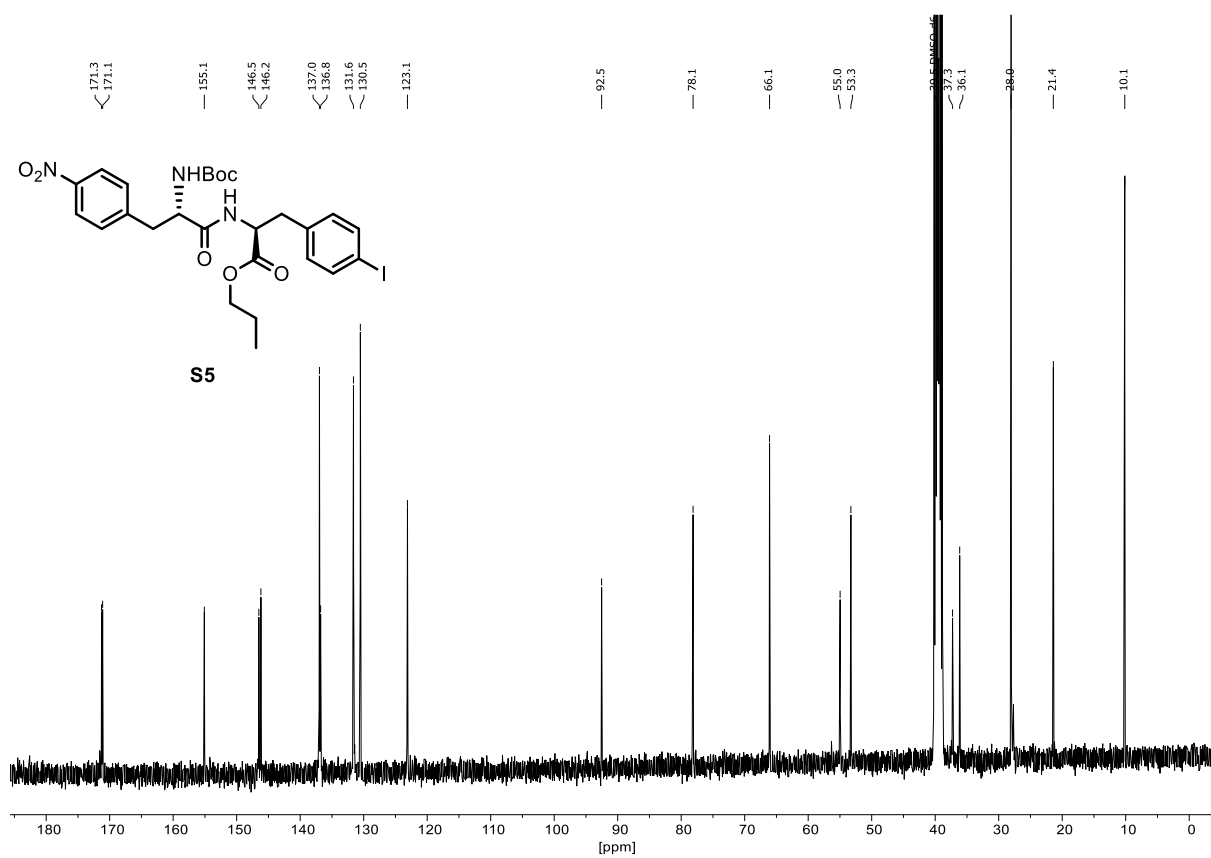

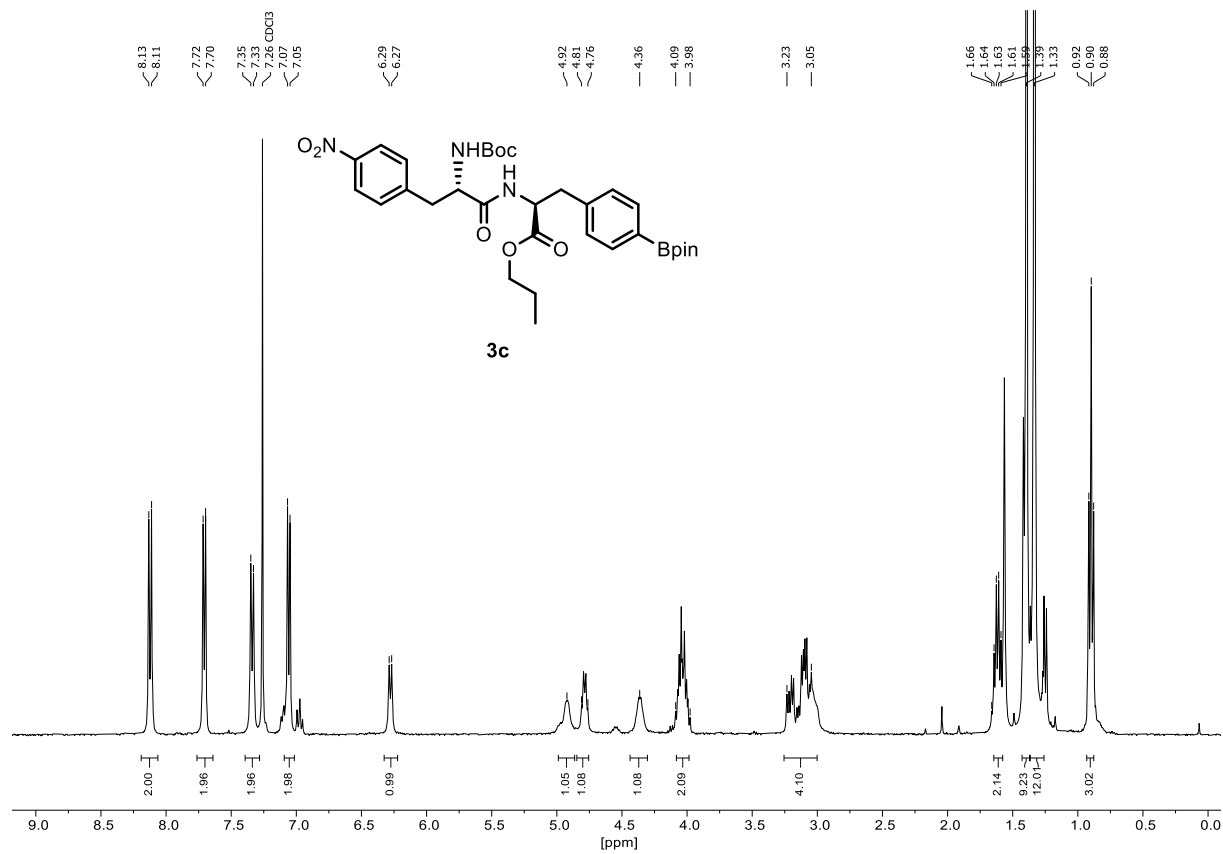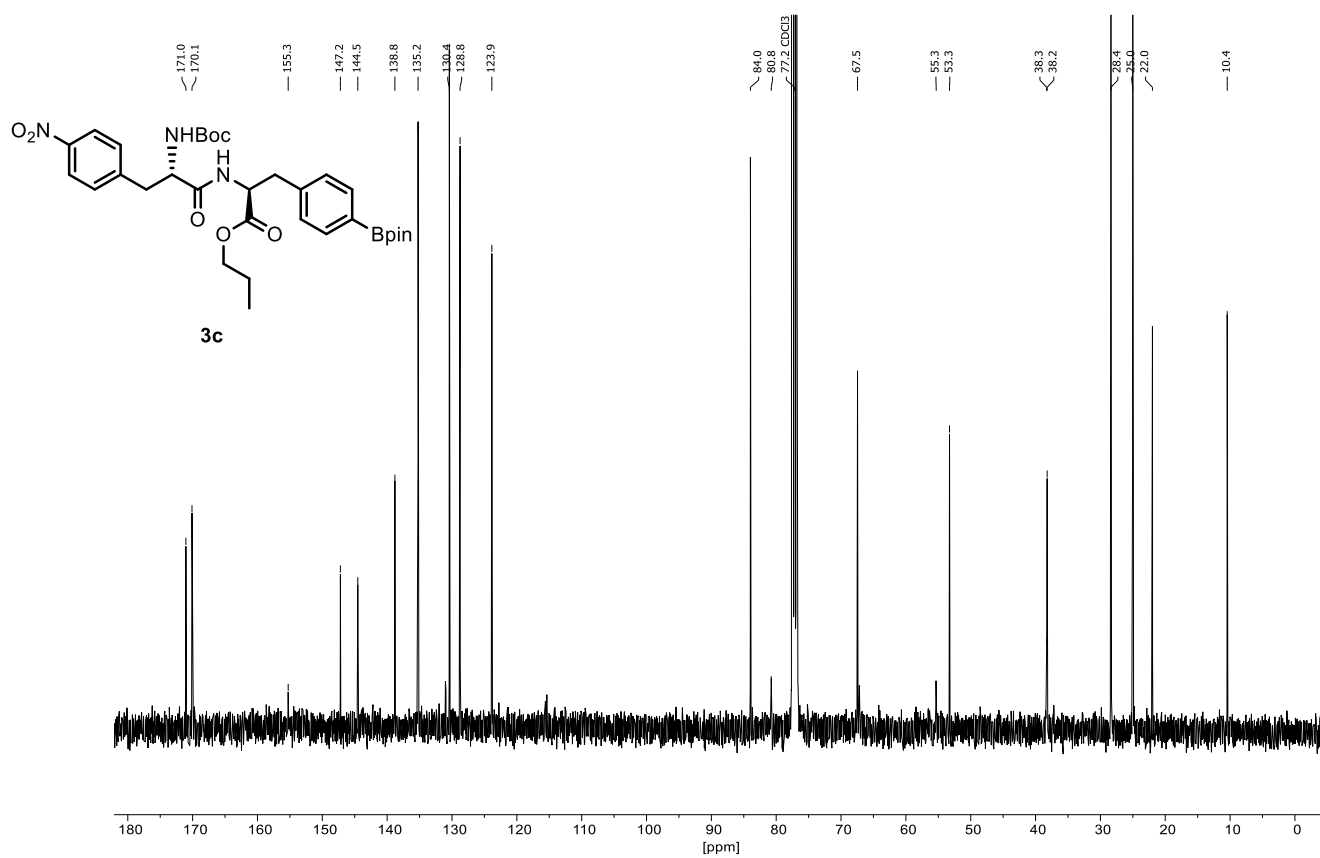



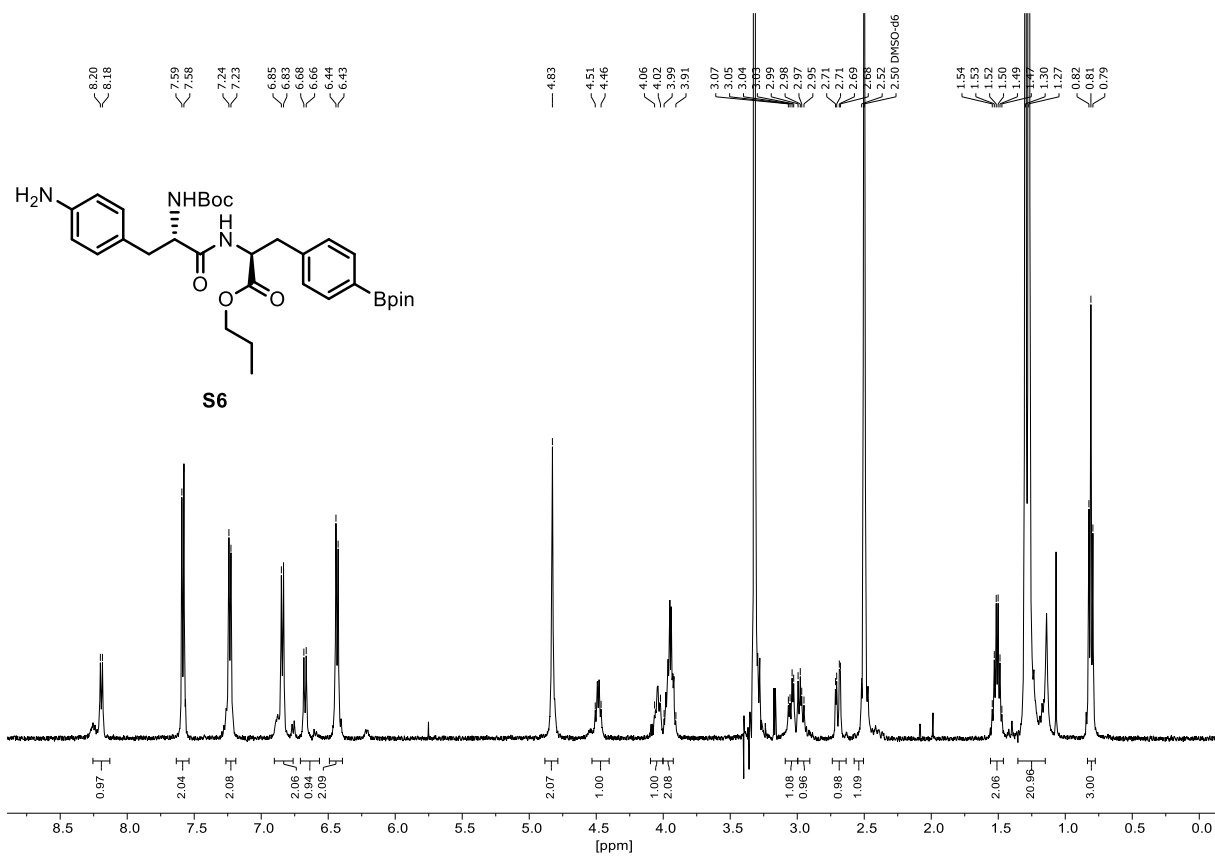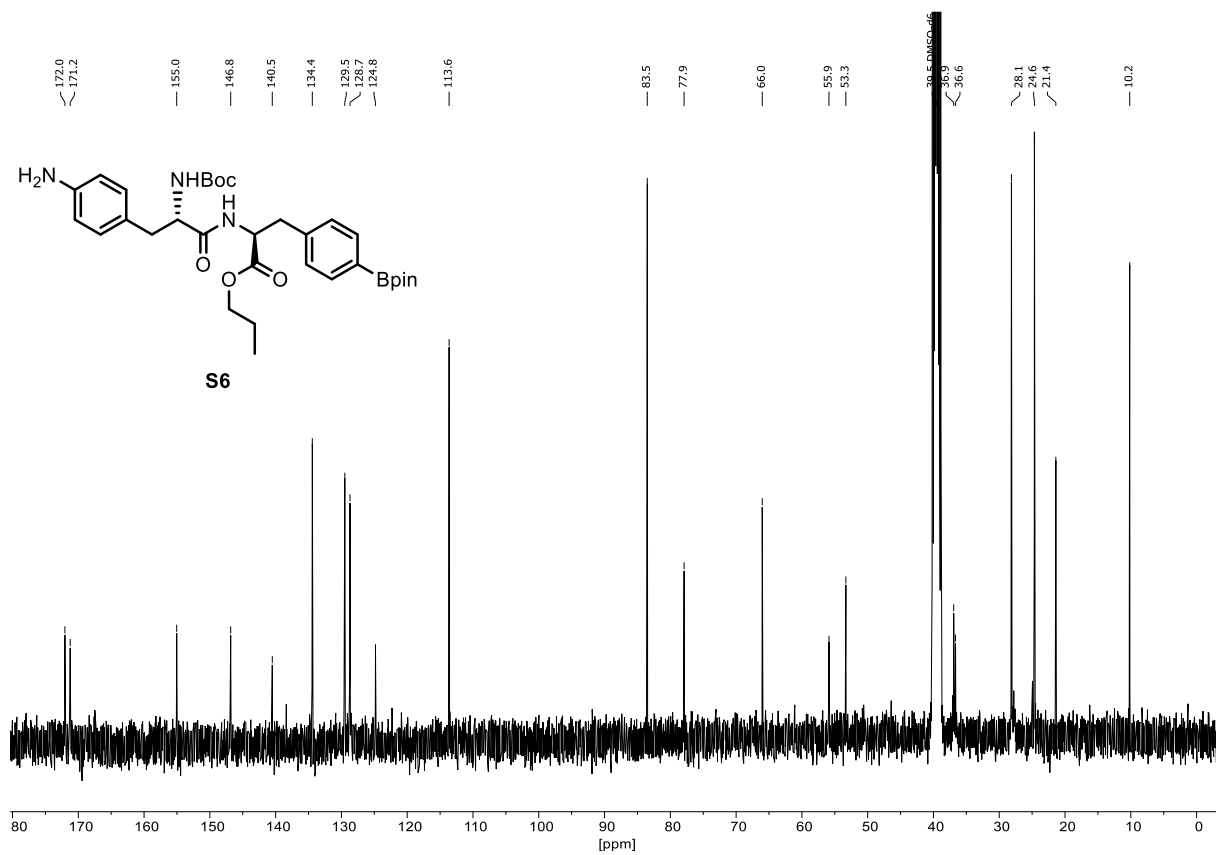

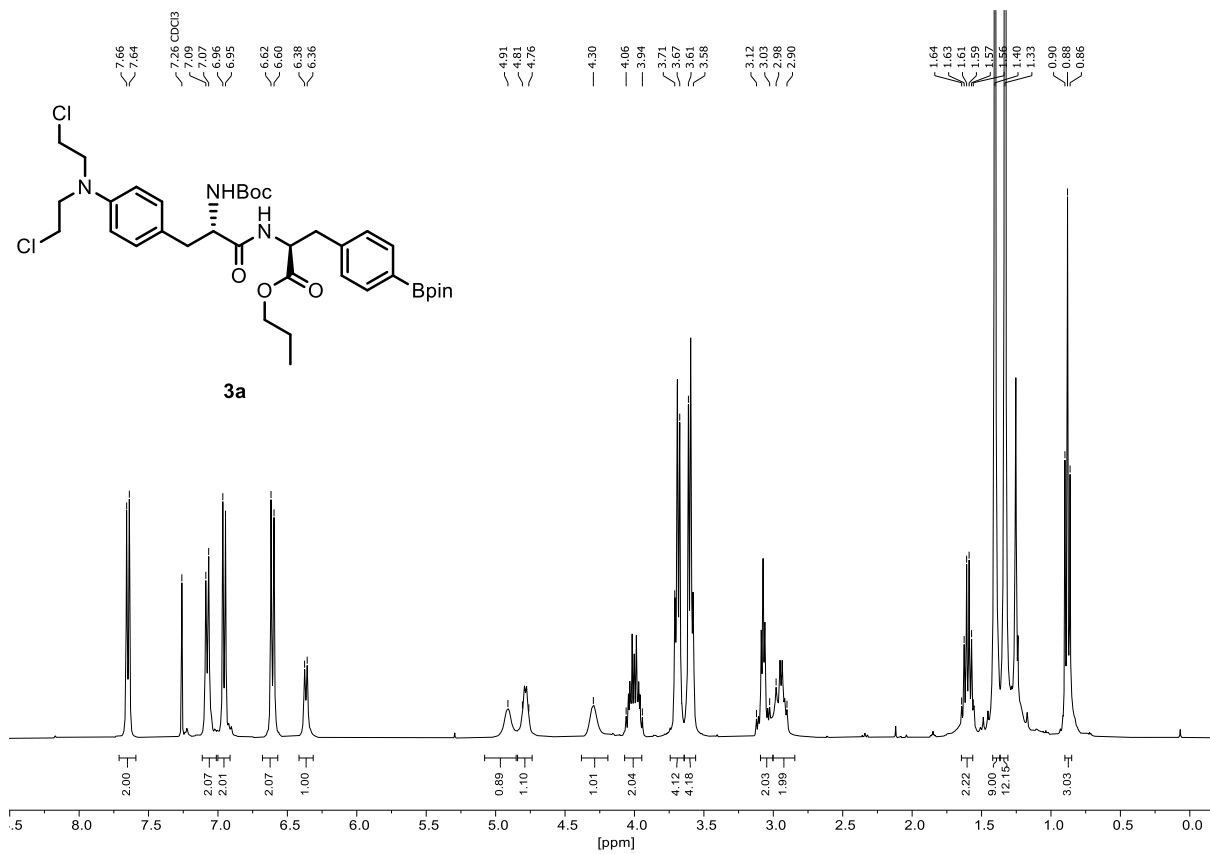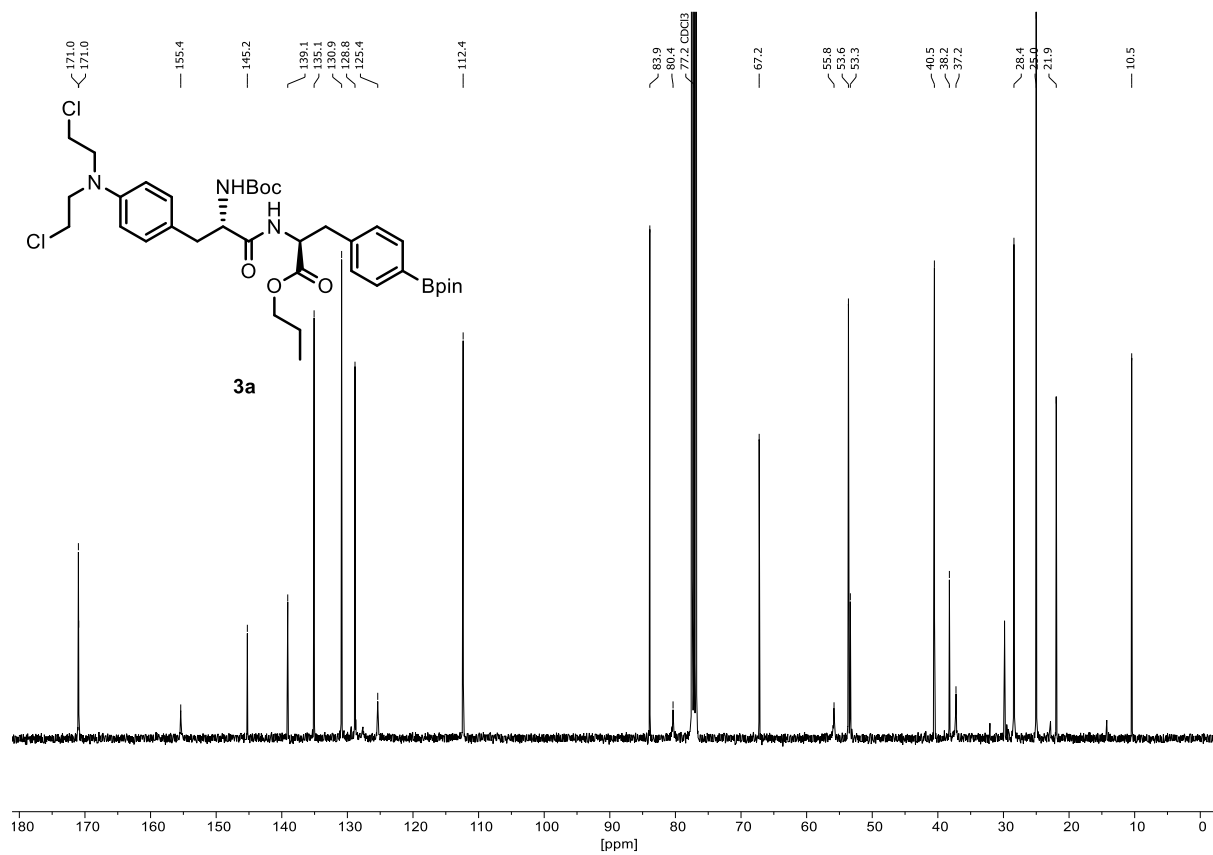

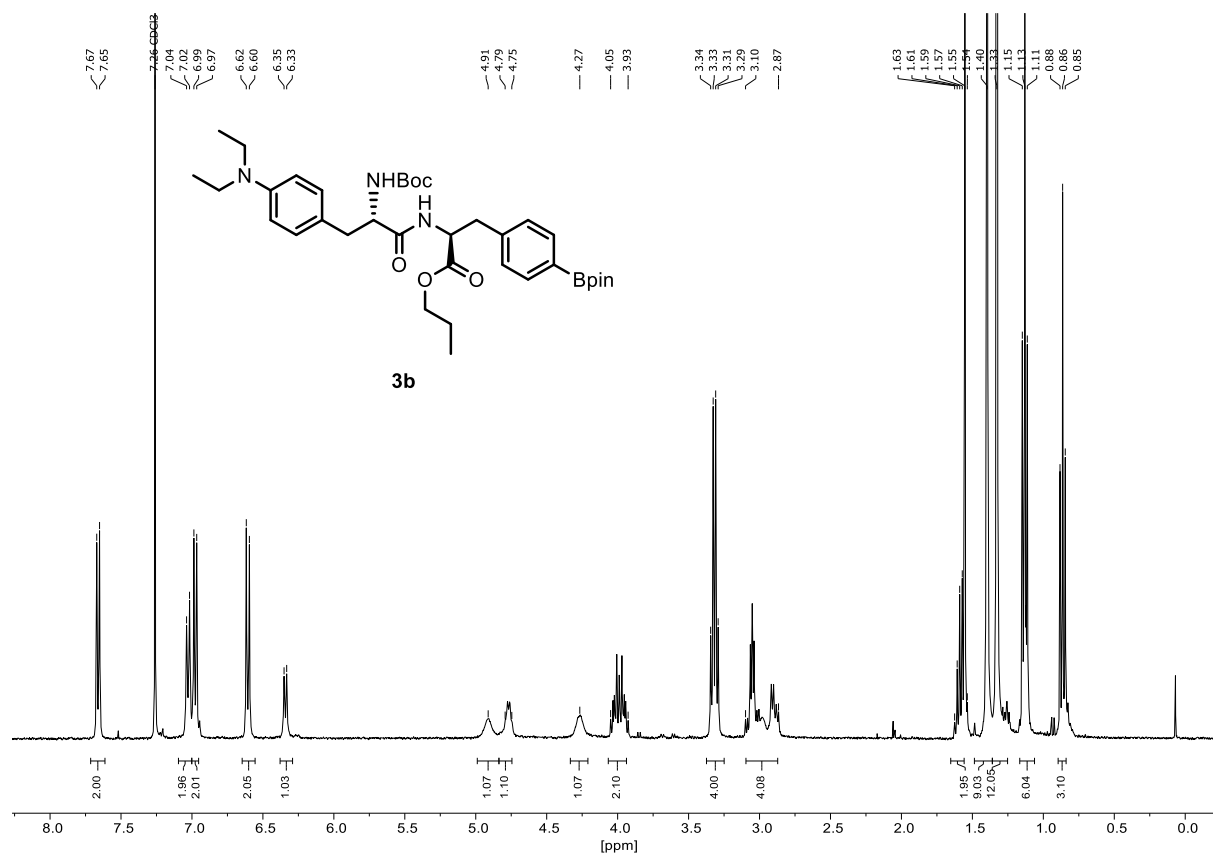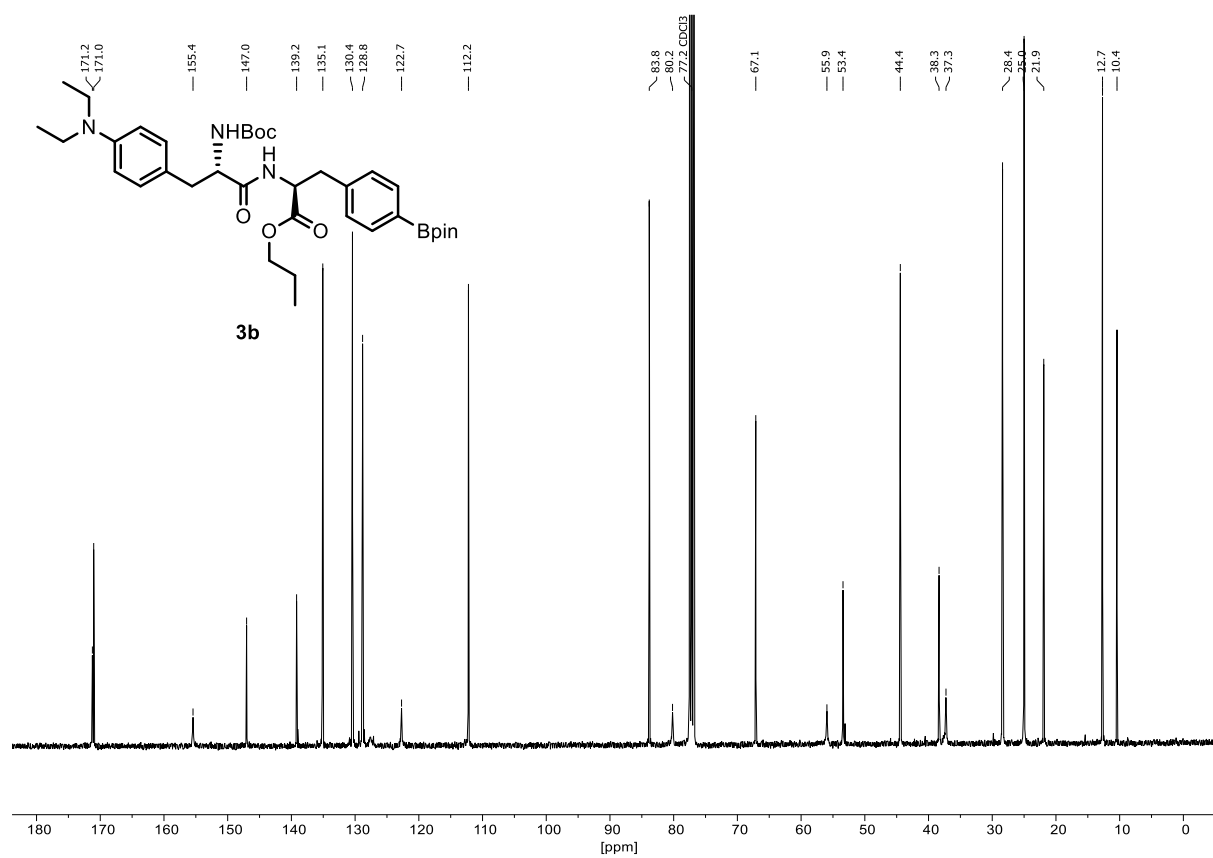

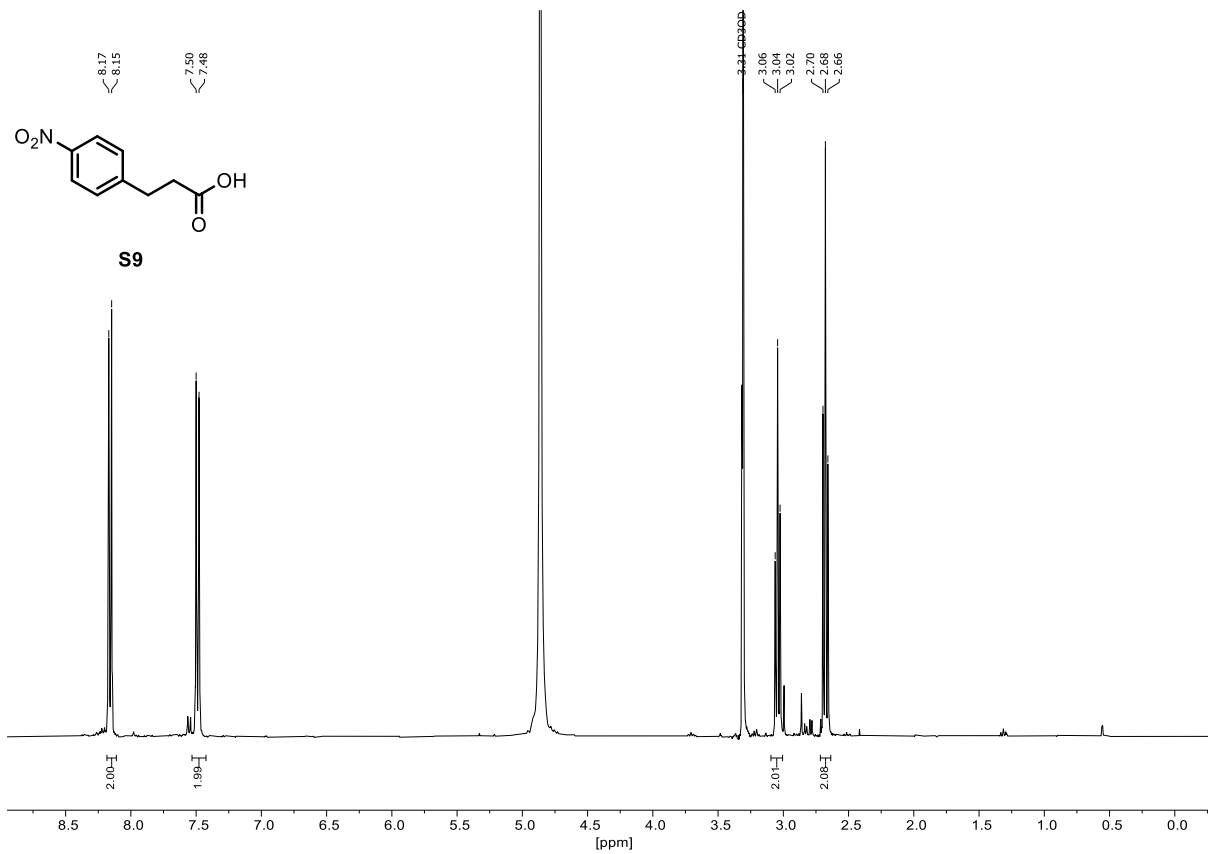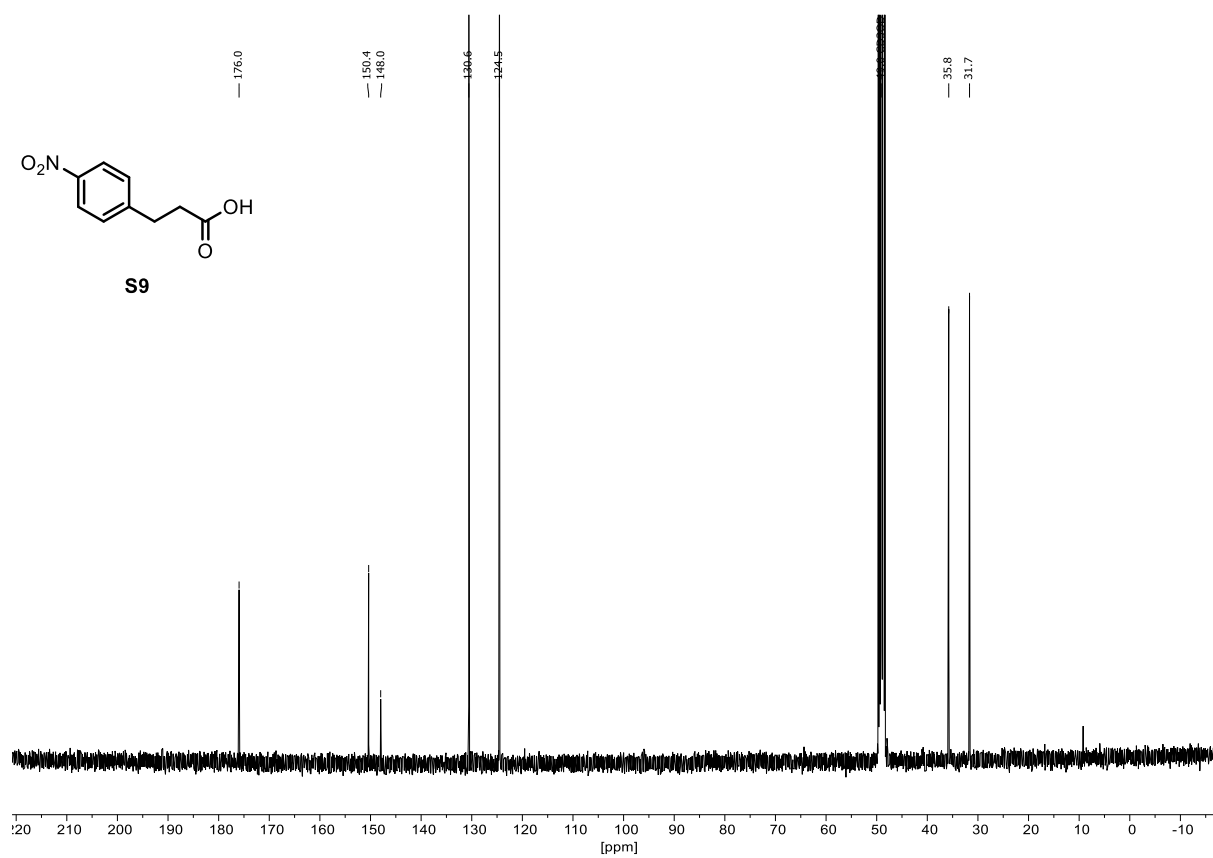

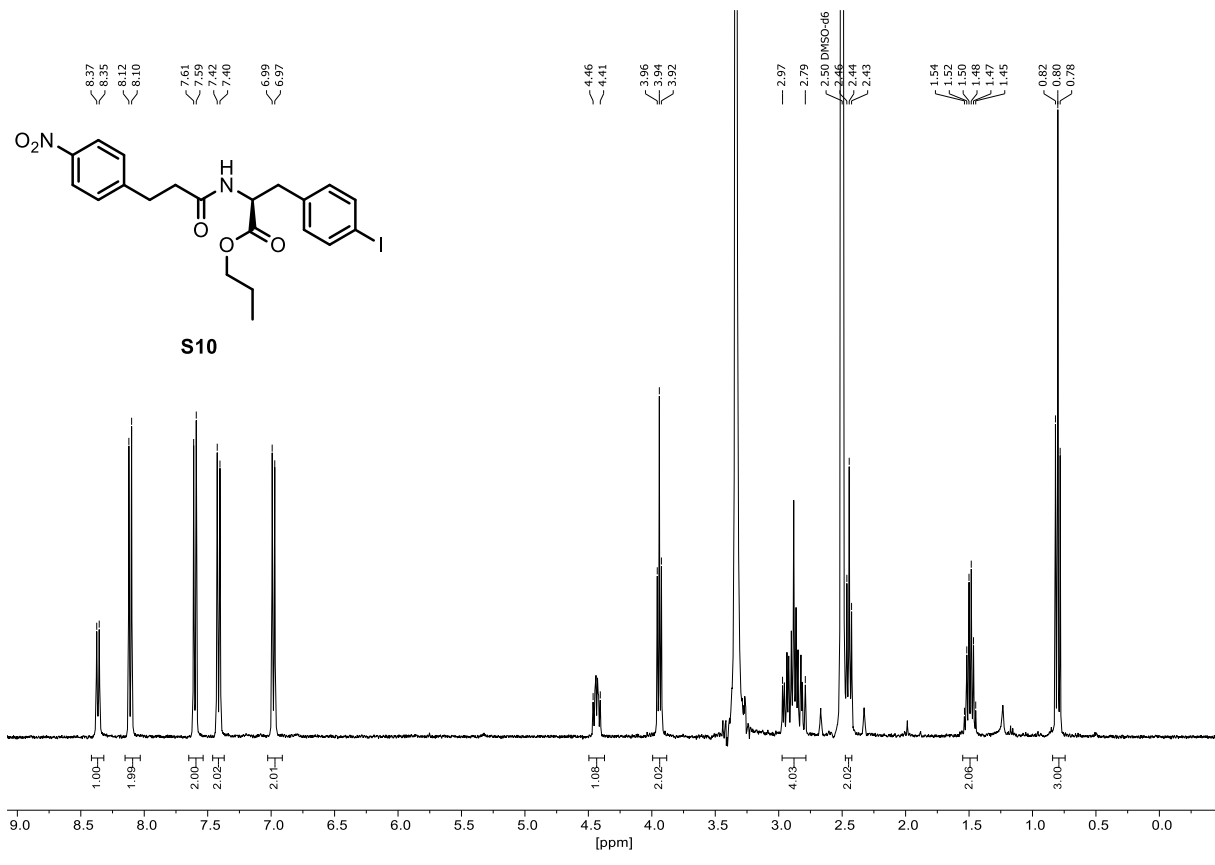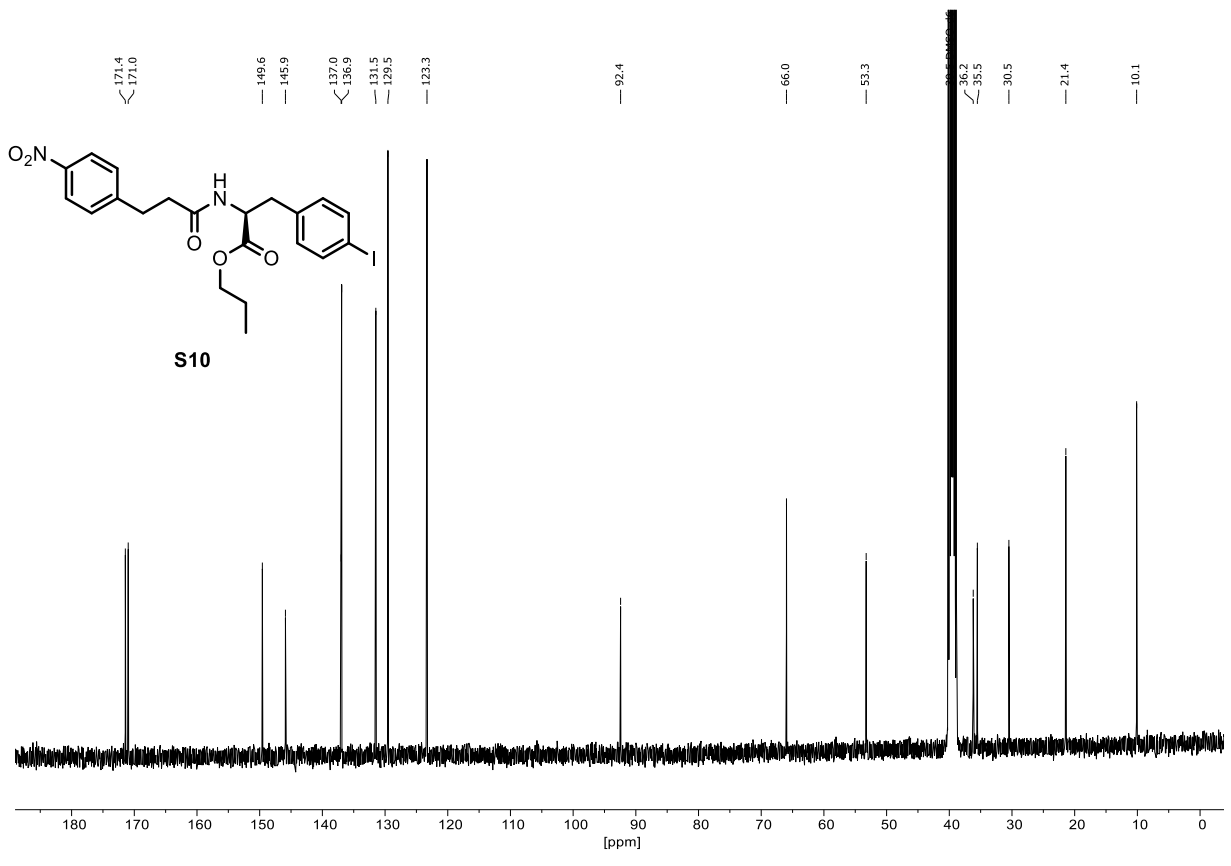

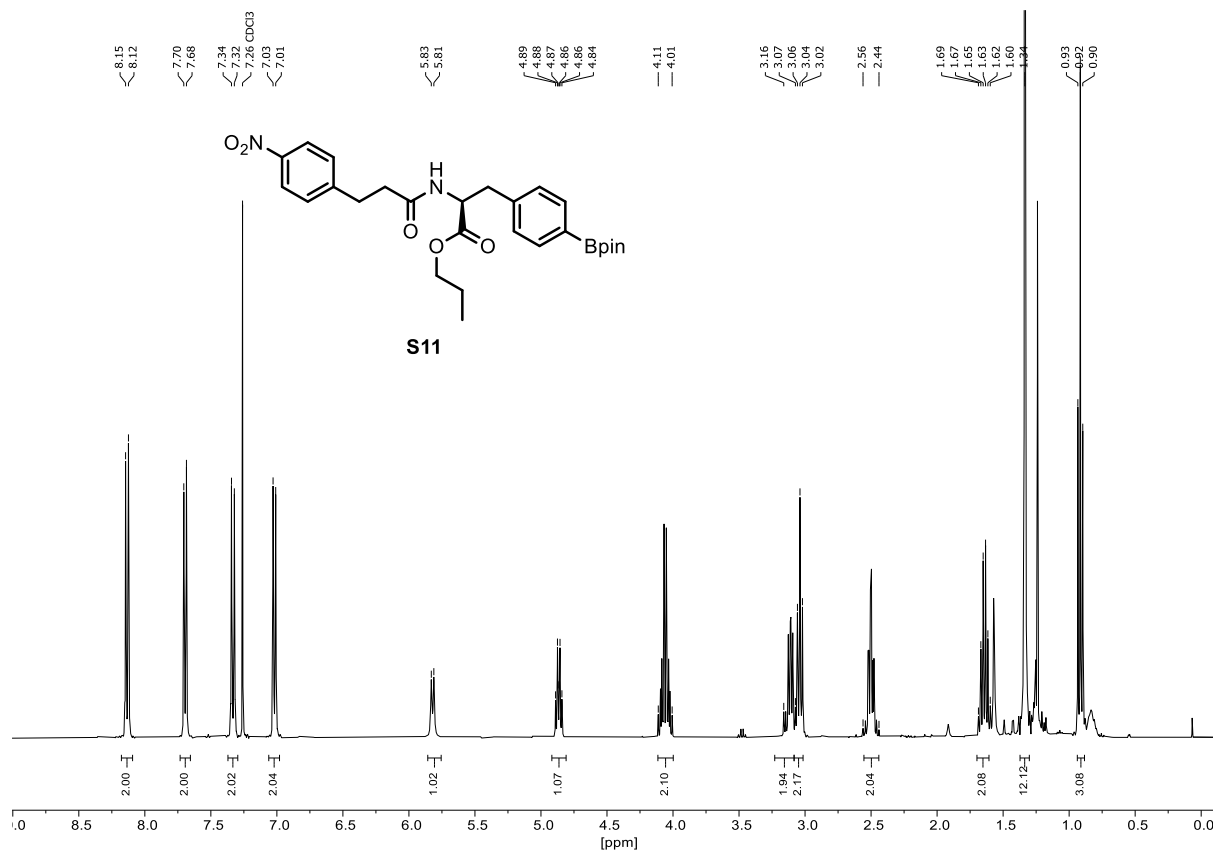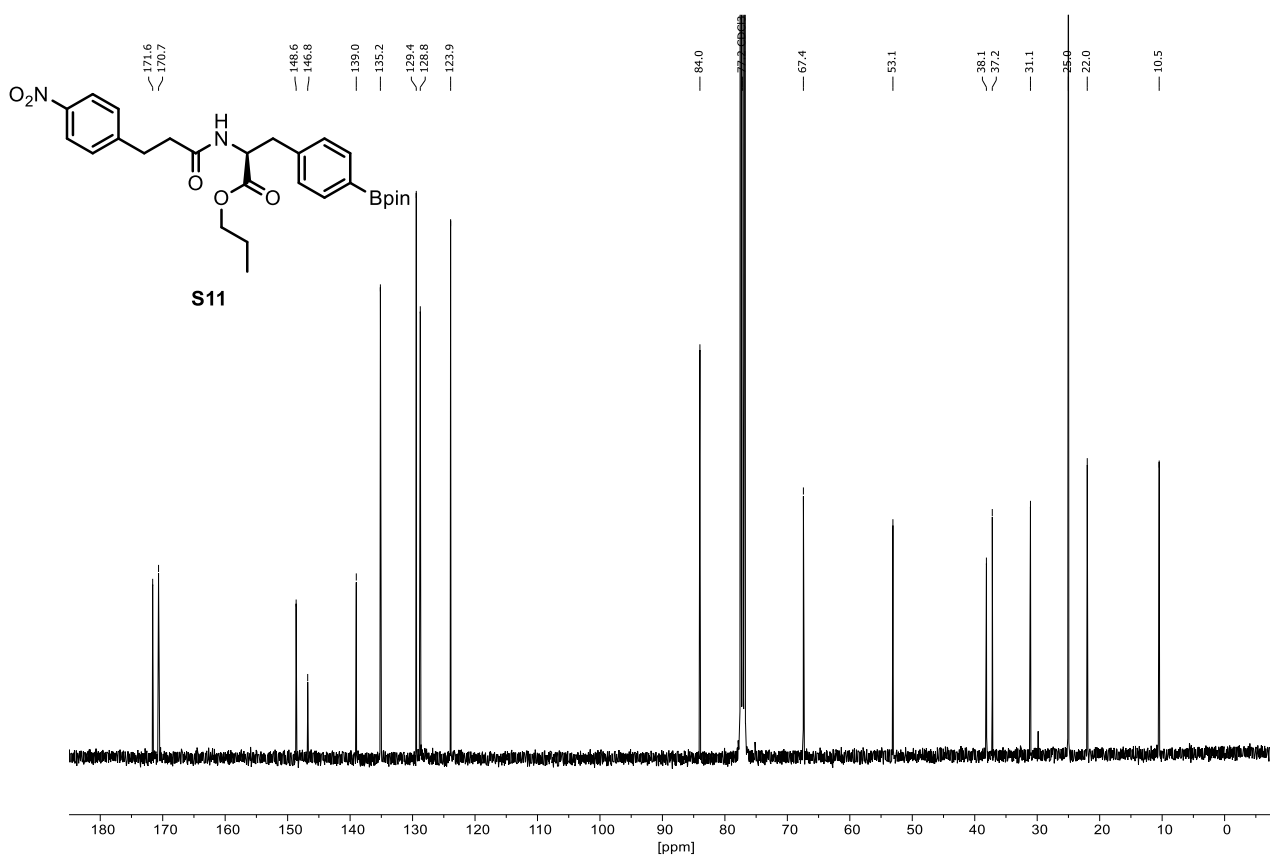

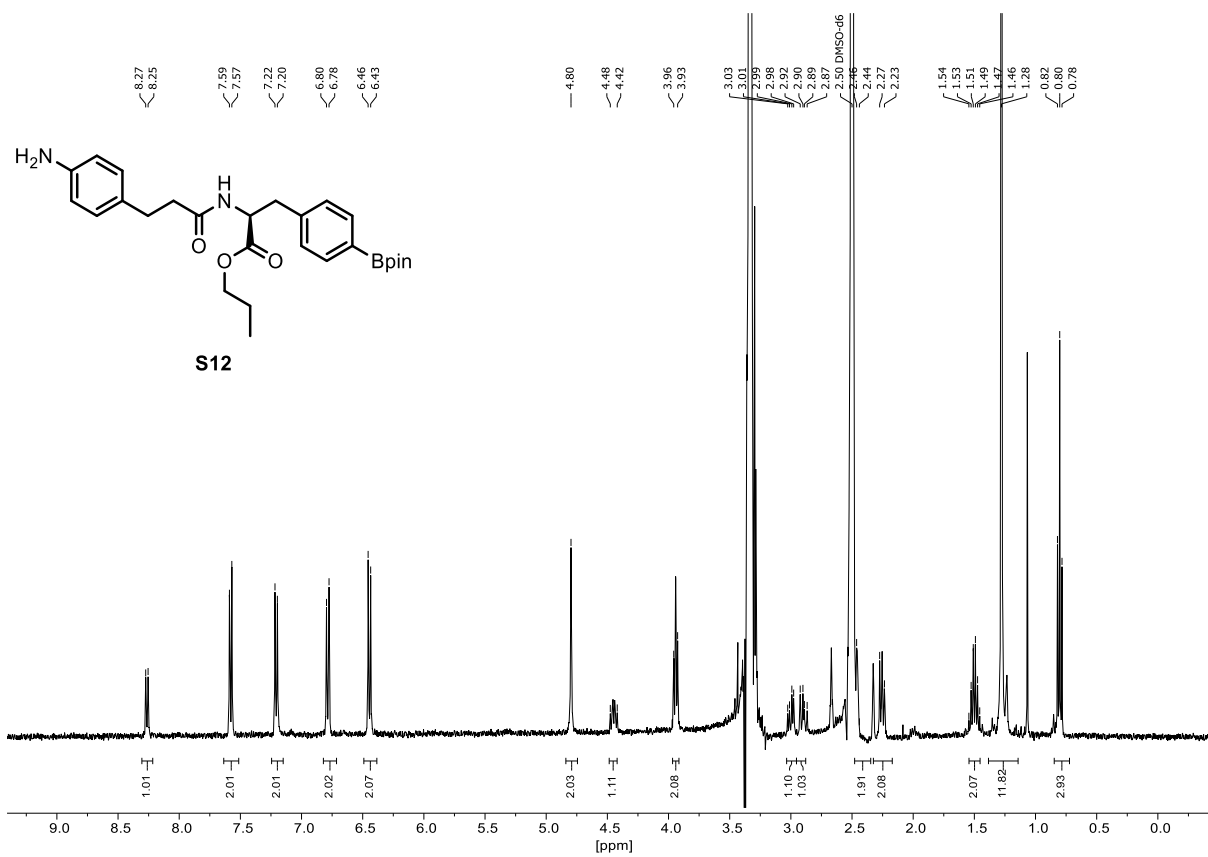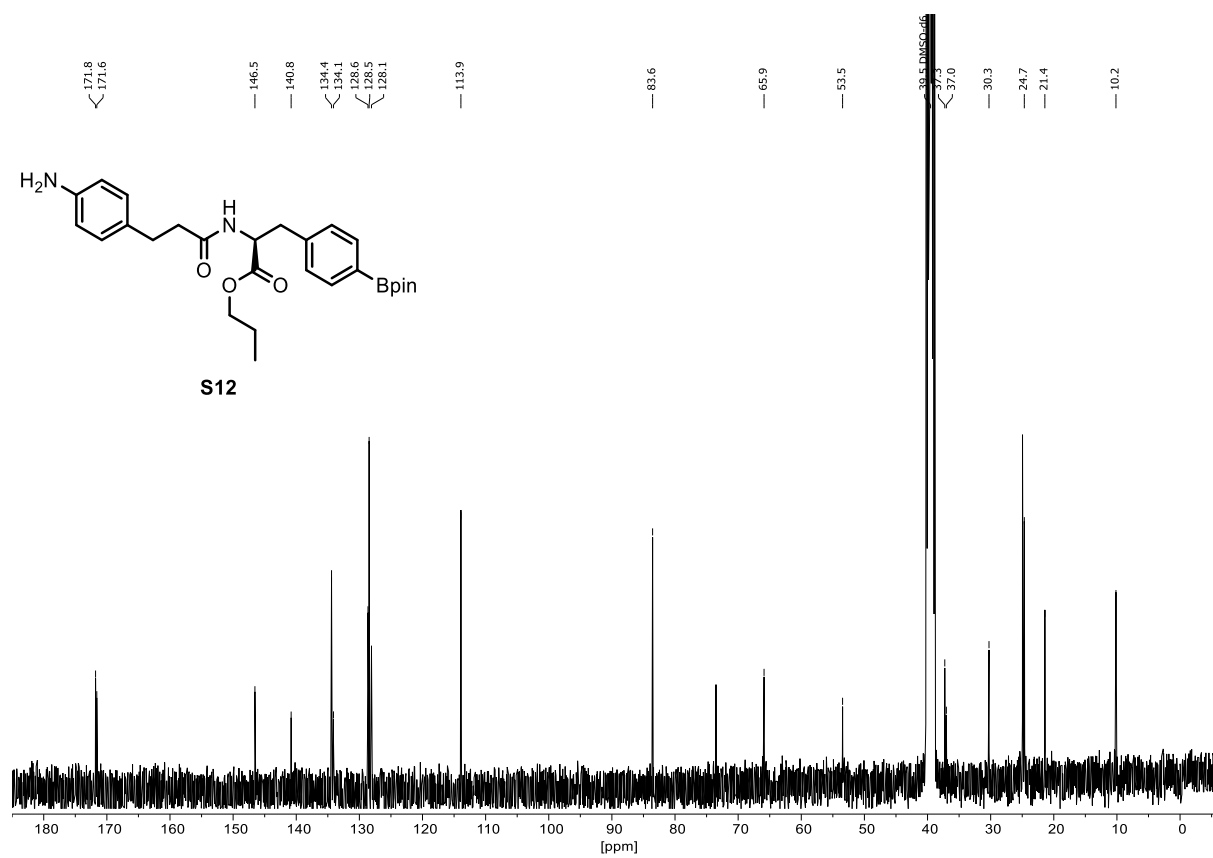

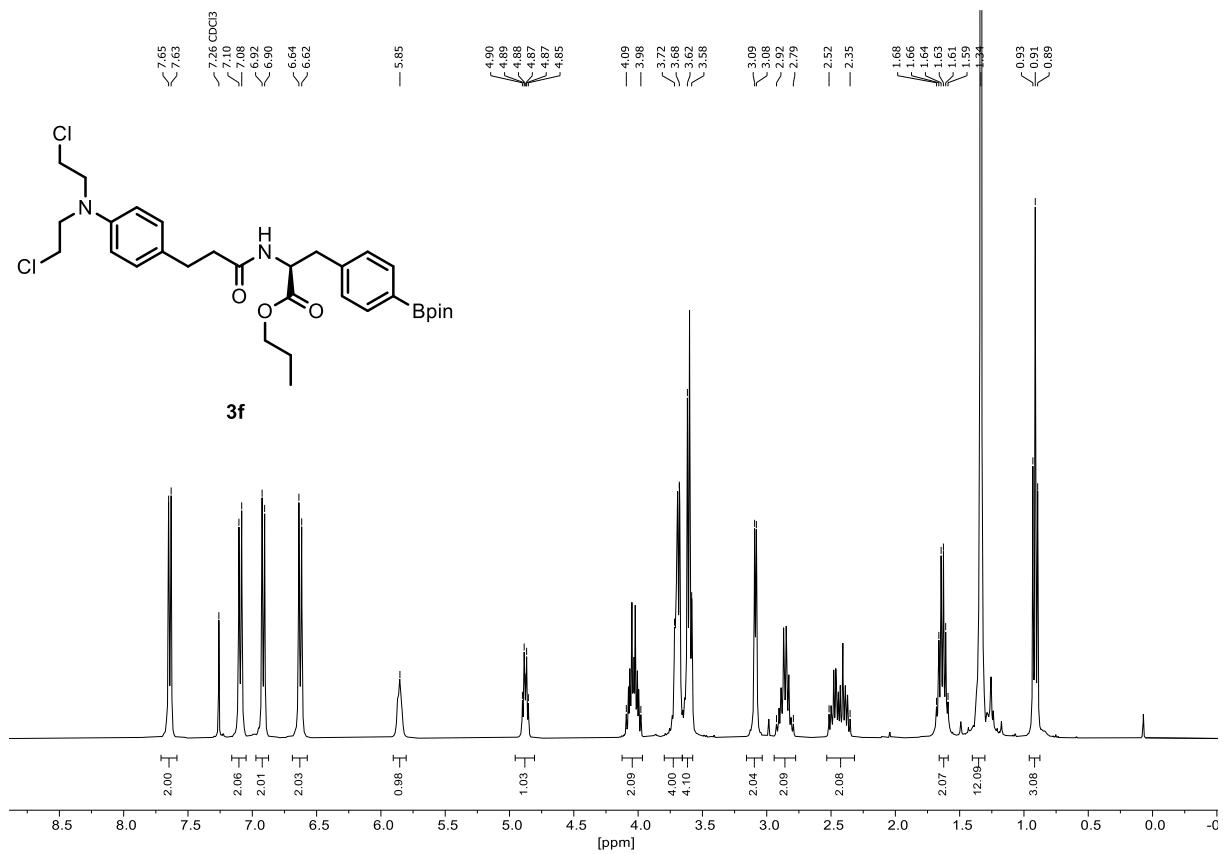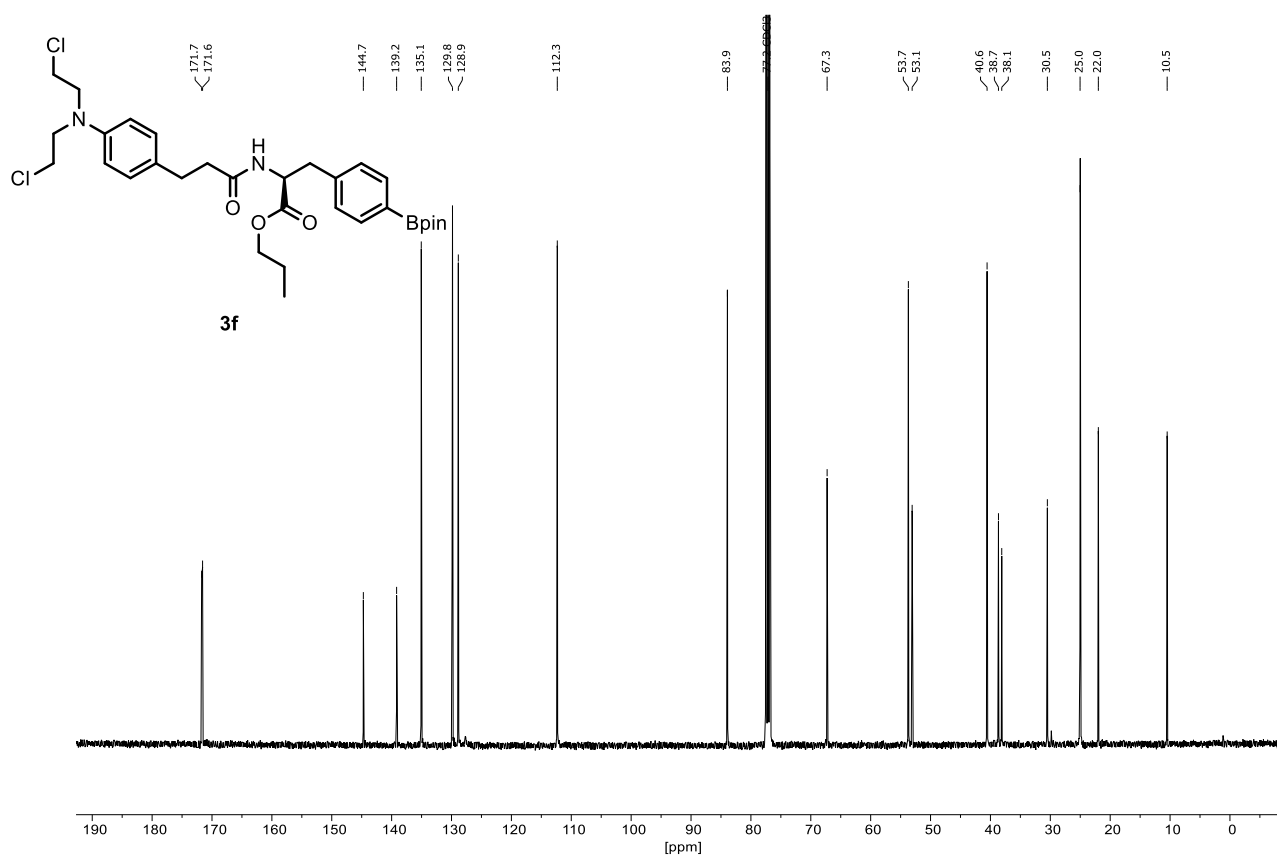



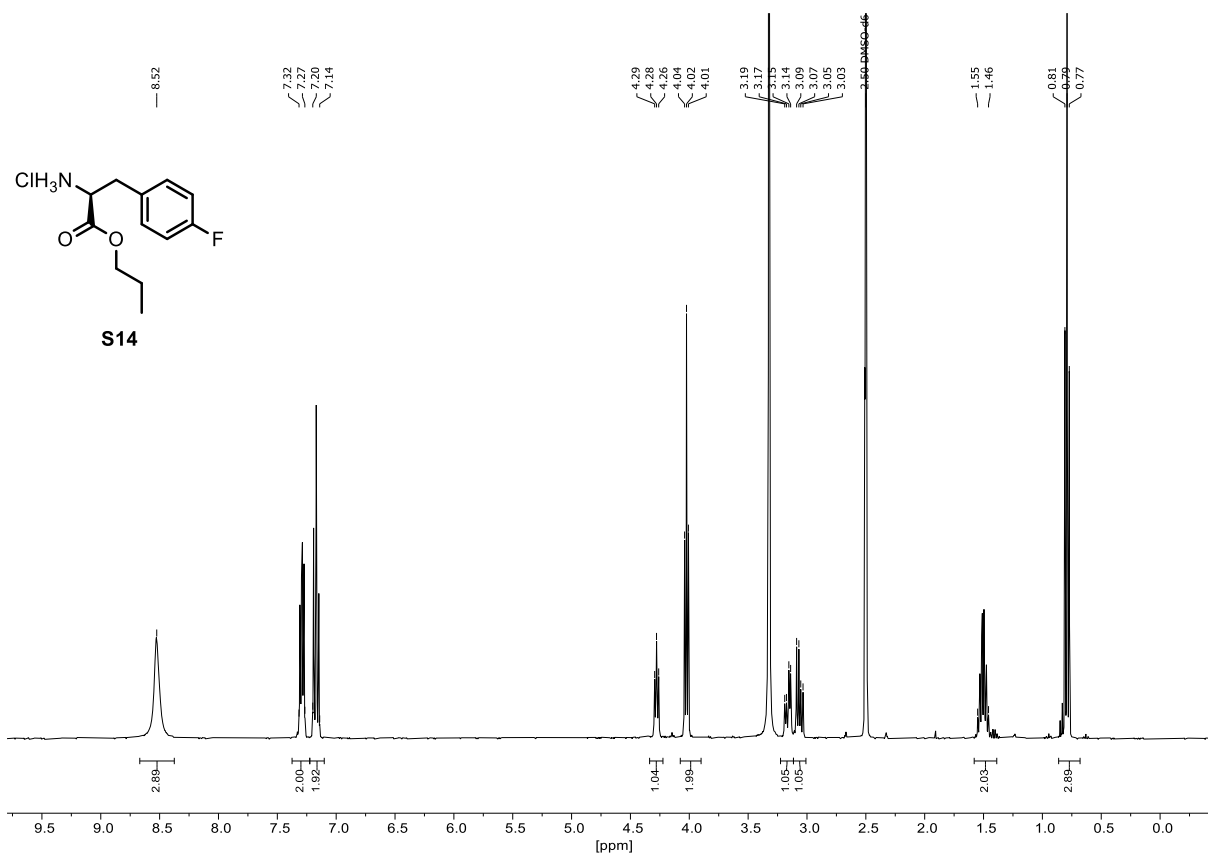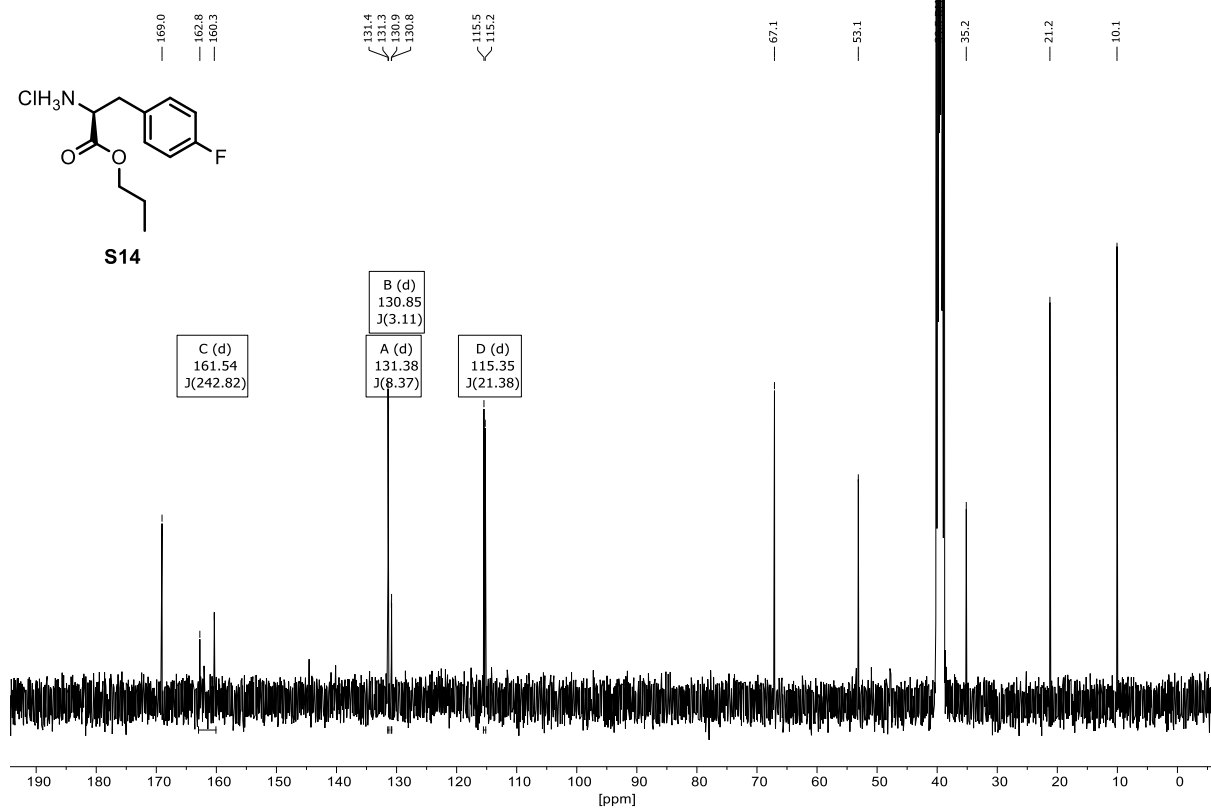

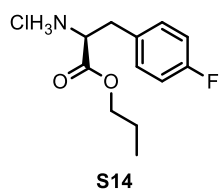

-115.56  
 -115.57  
 -115.58  
 -115.60  
 -115.61  
 -115.62  
 -115.64

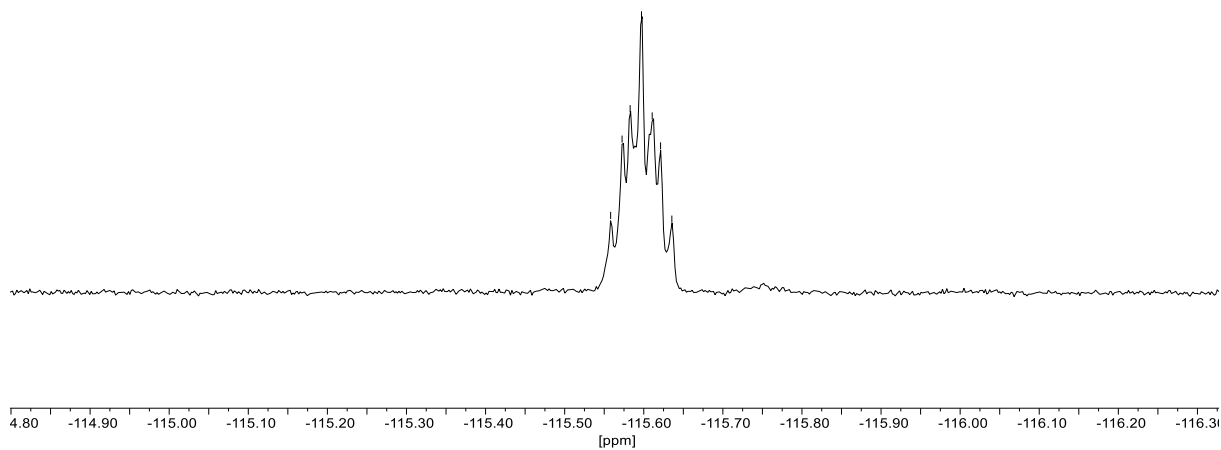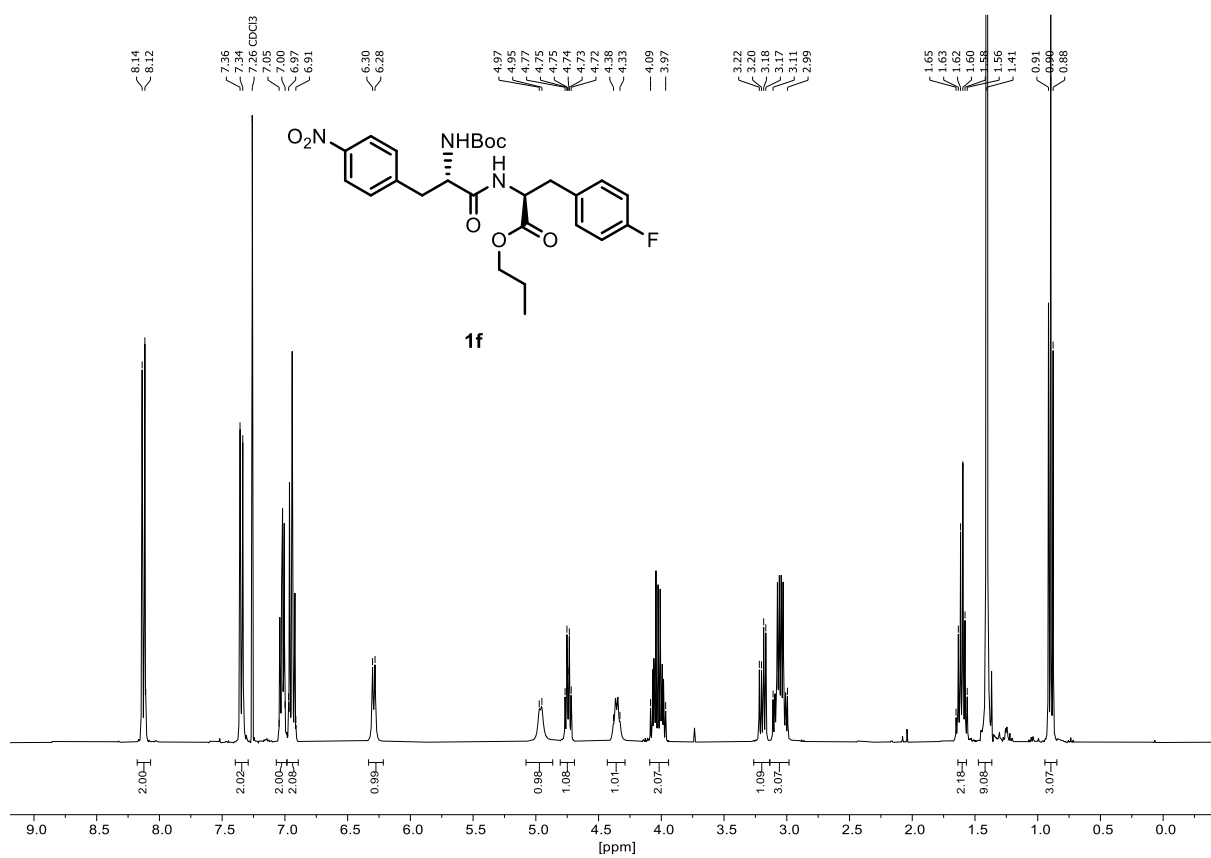

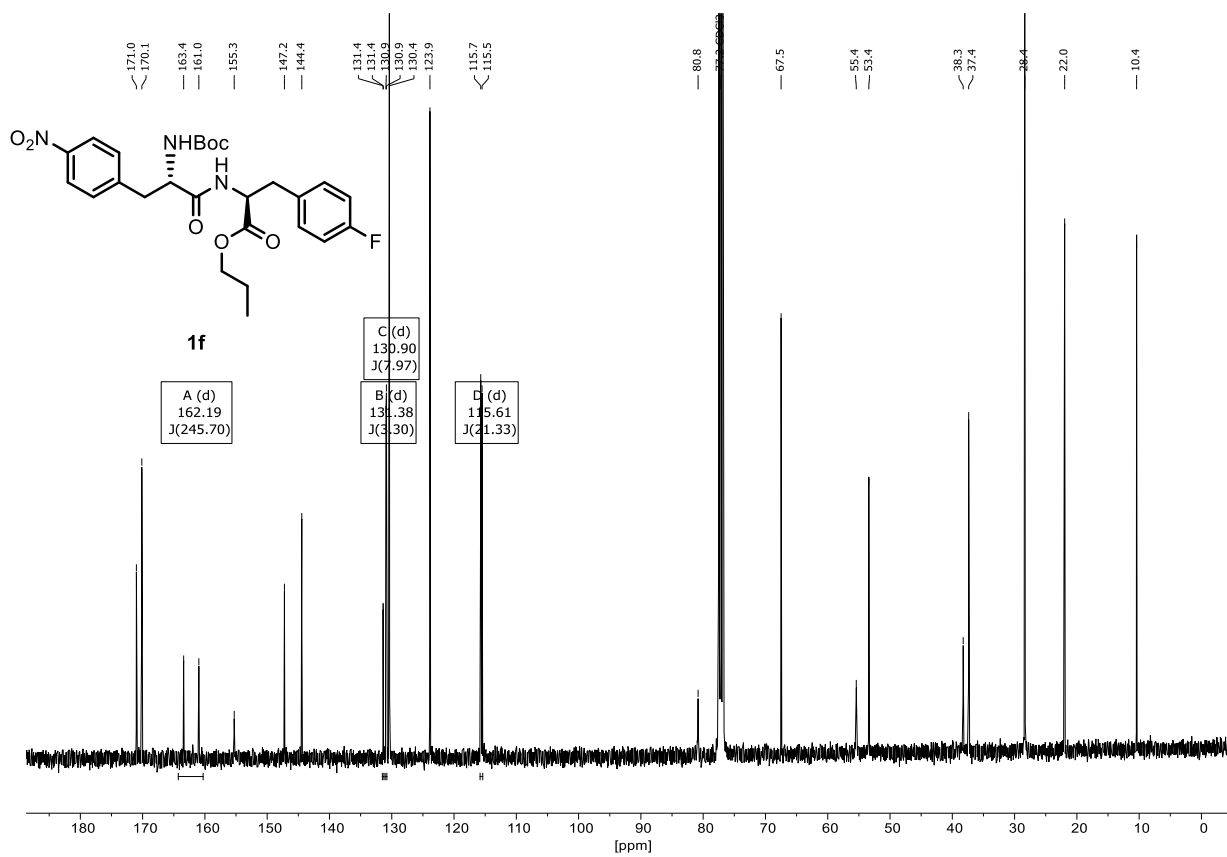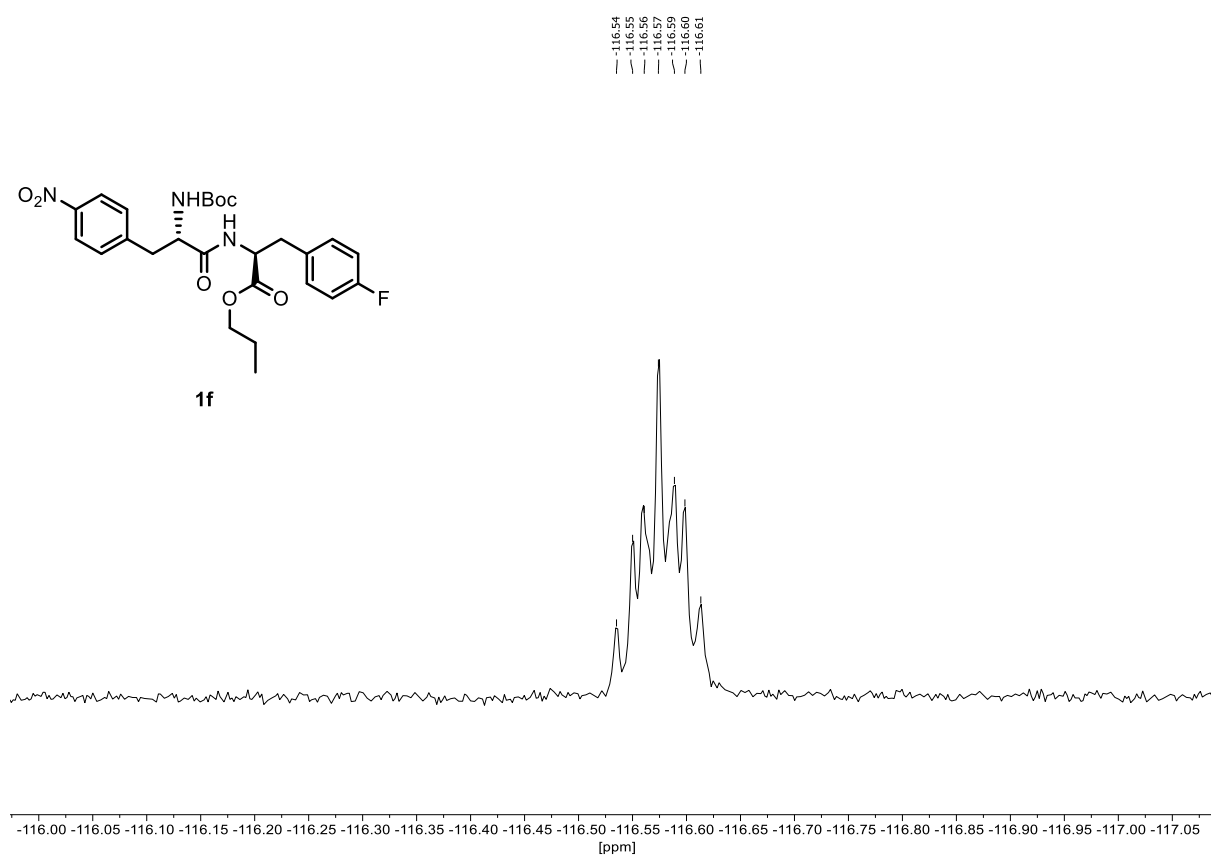

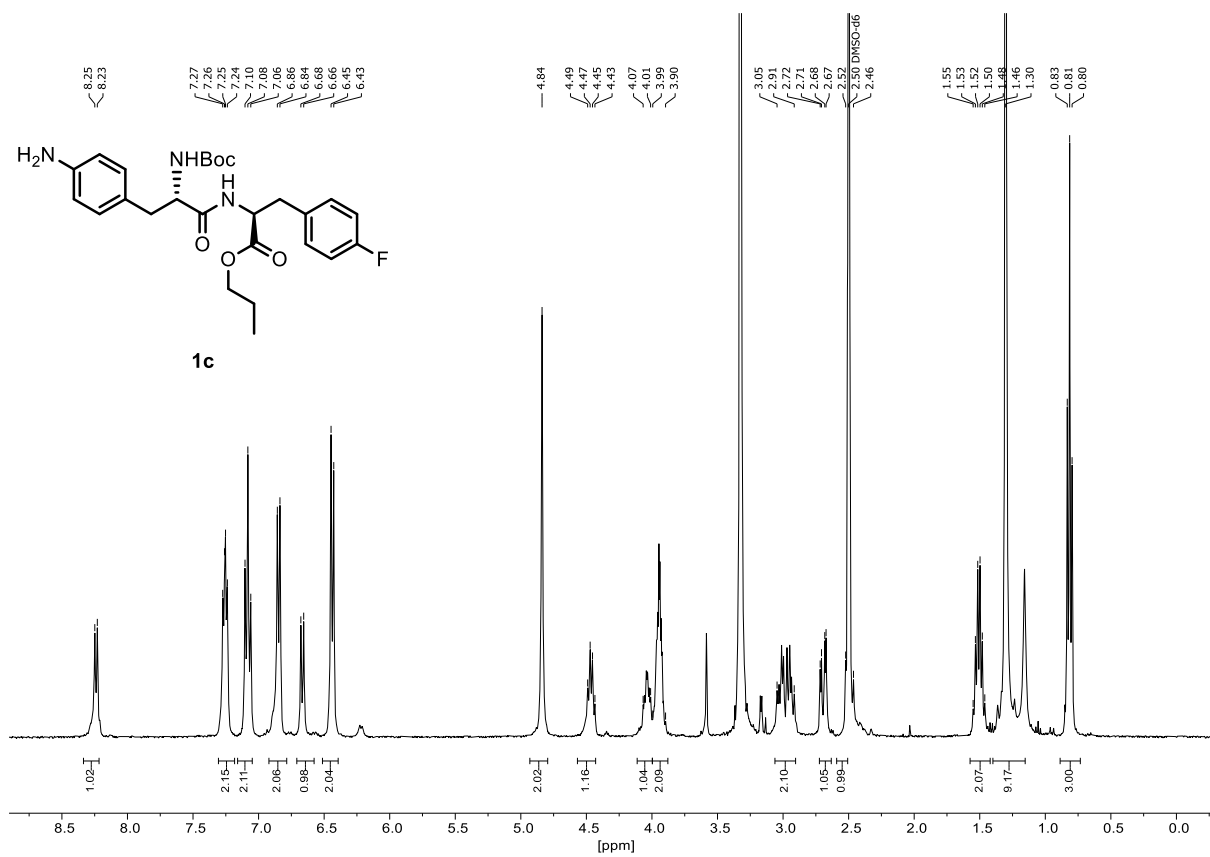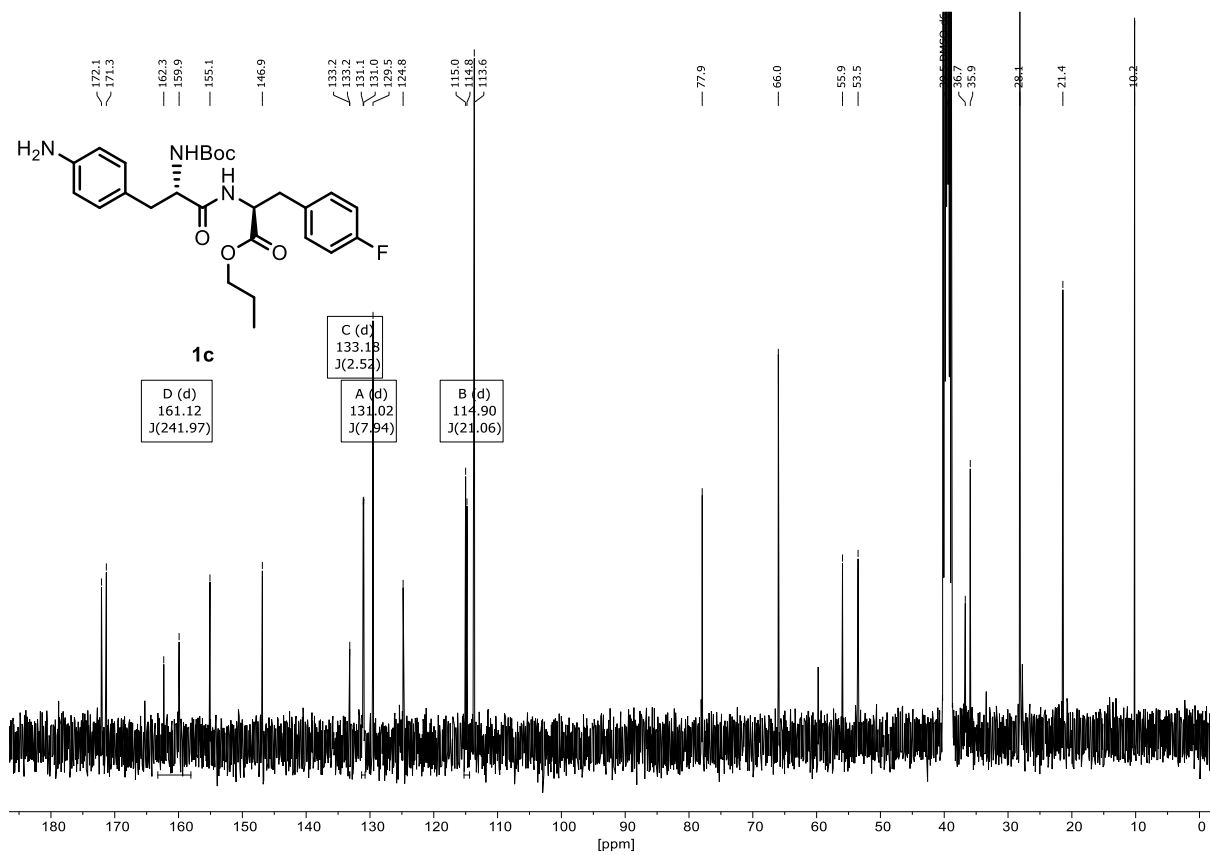

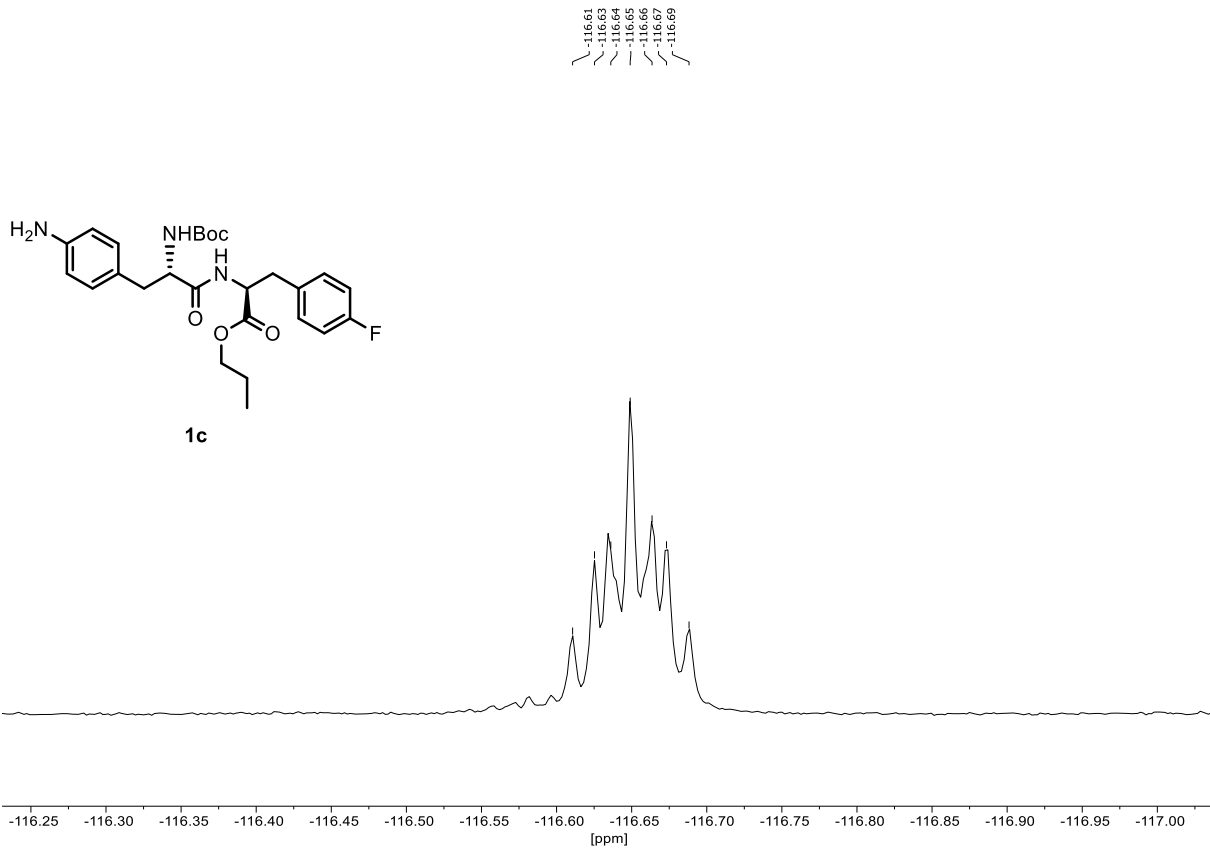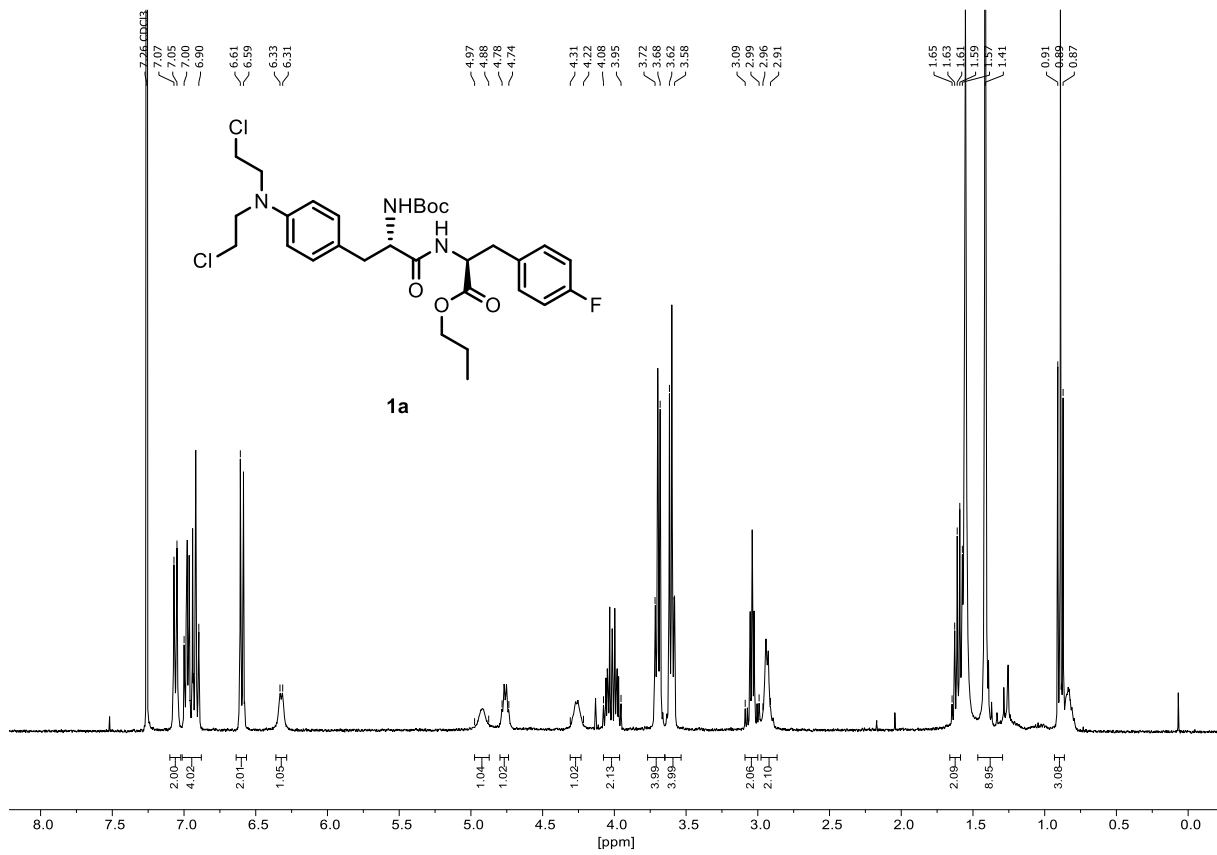

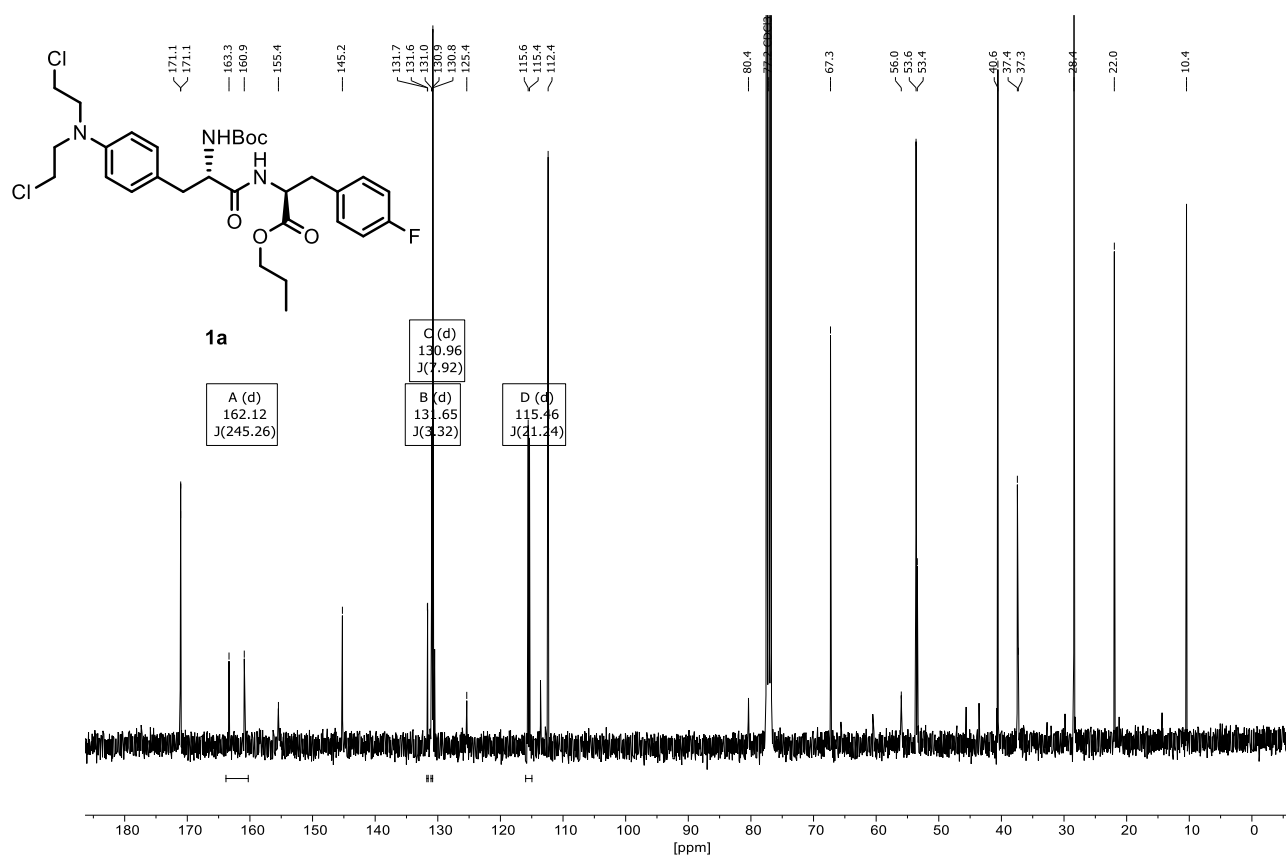

116.60  
116.61  
116.62  
116.63  
116.65  
116.66  
116.67

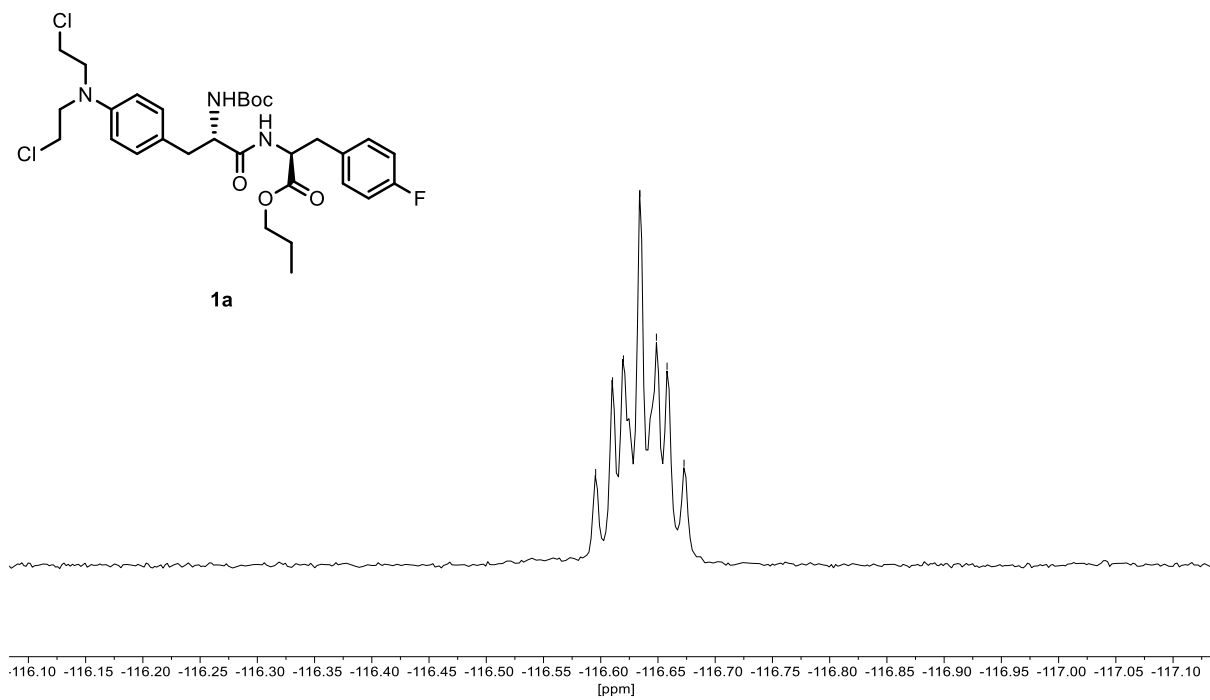

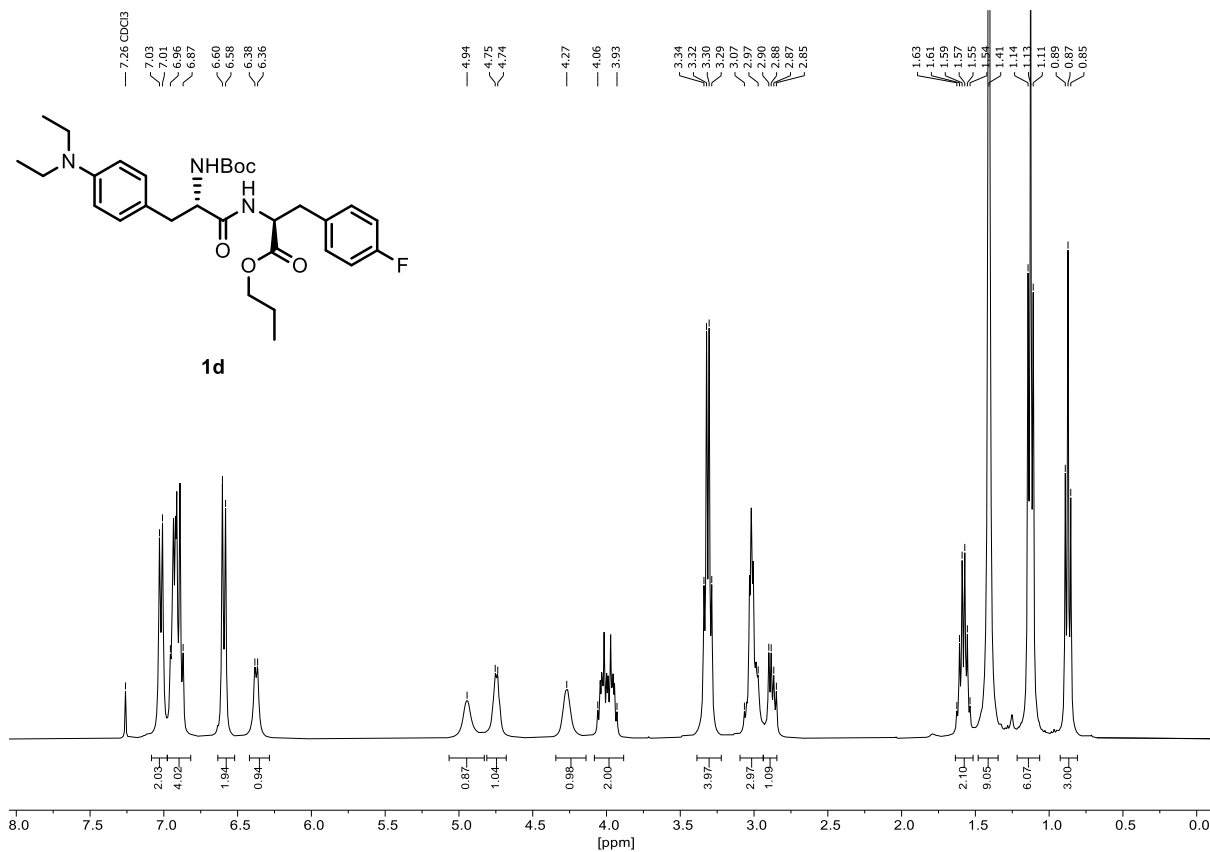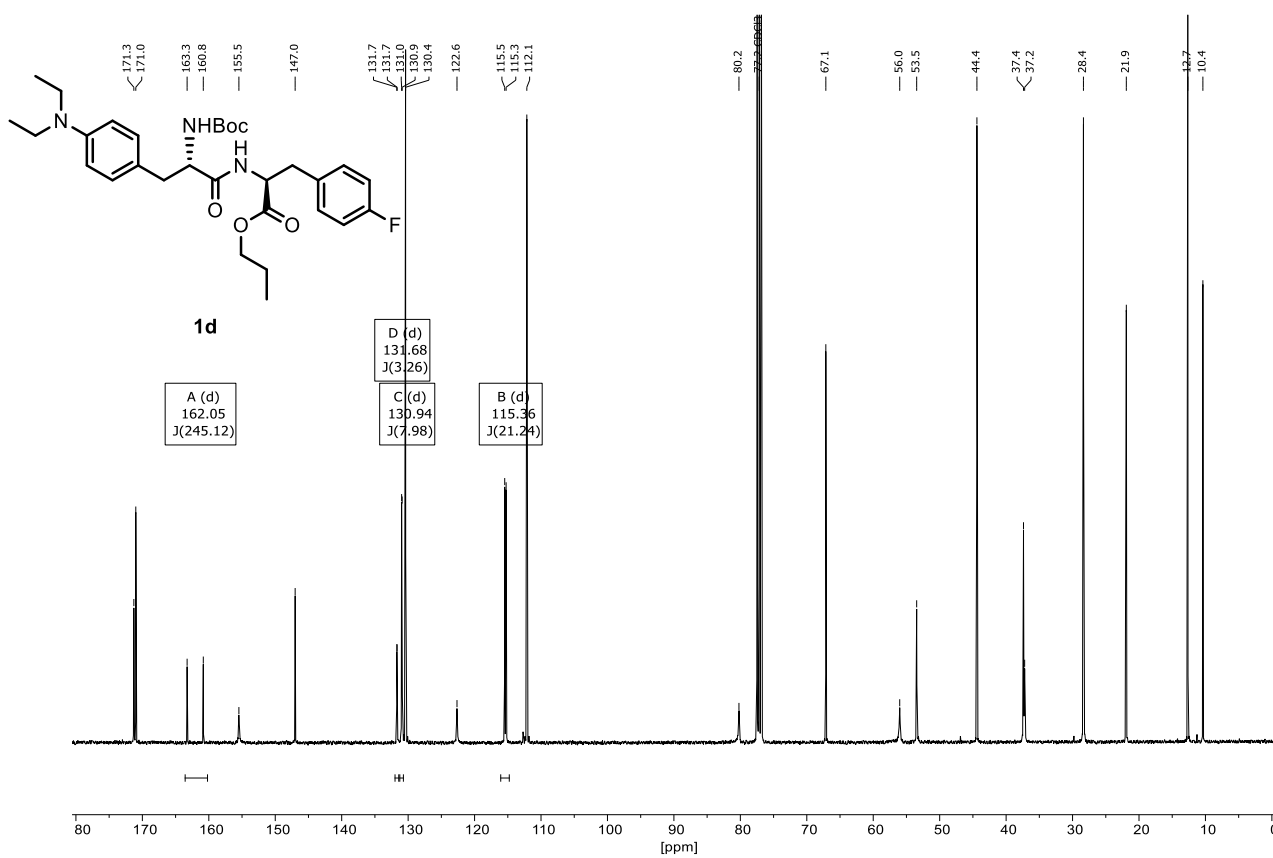

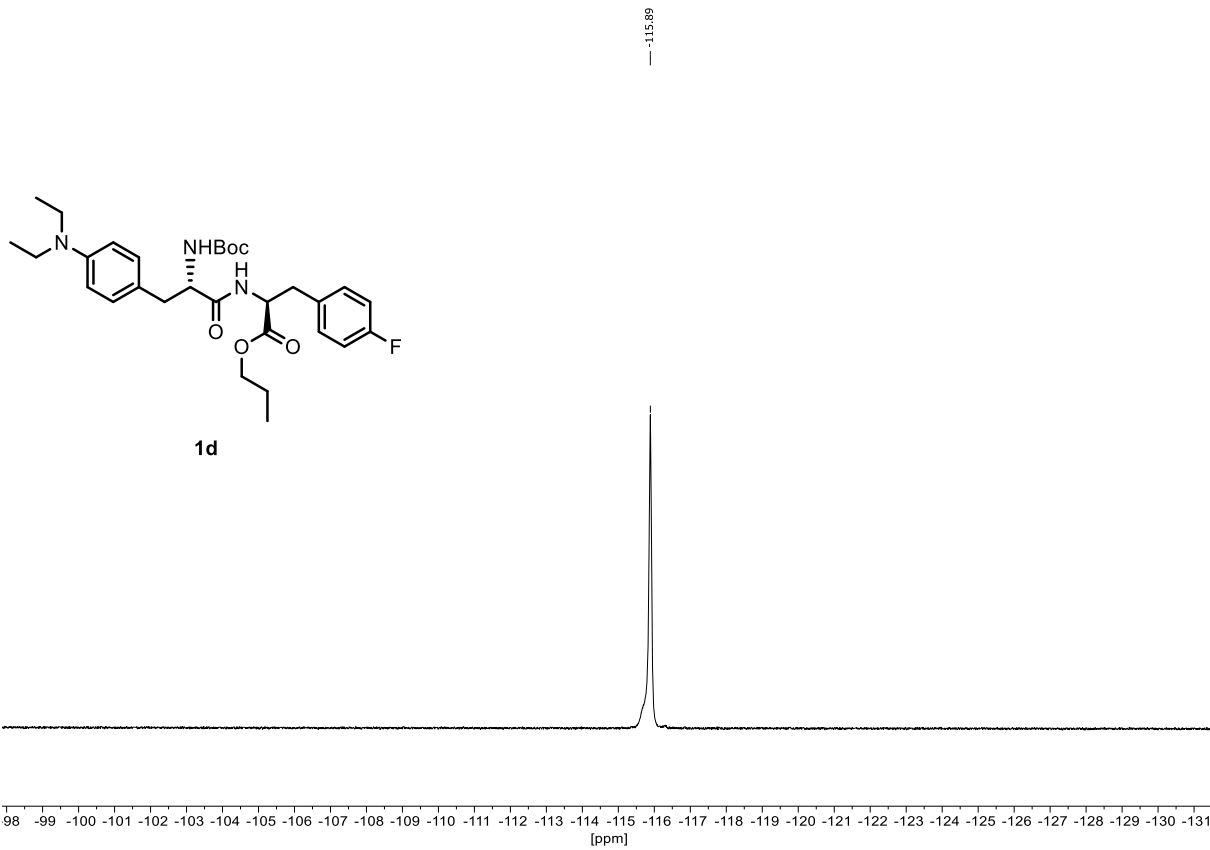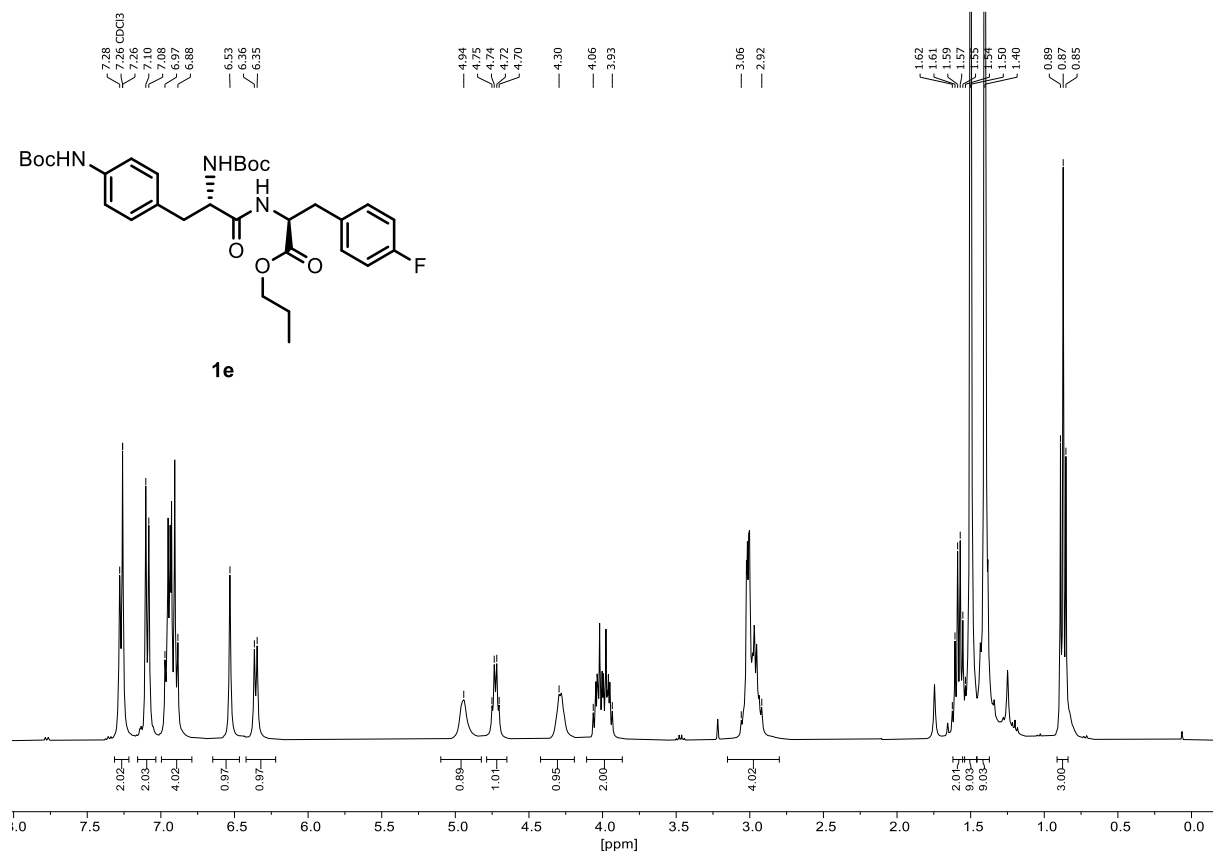



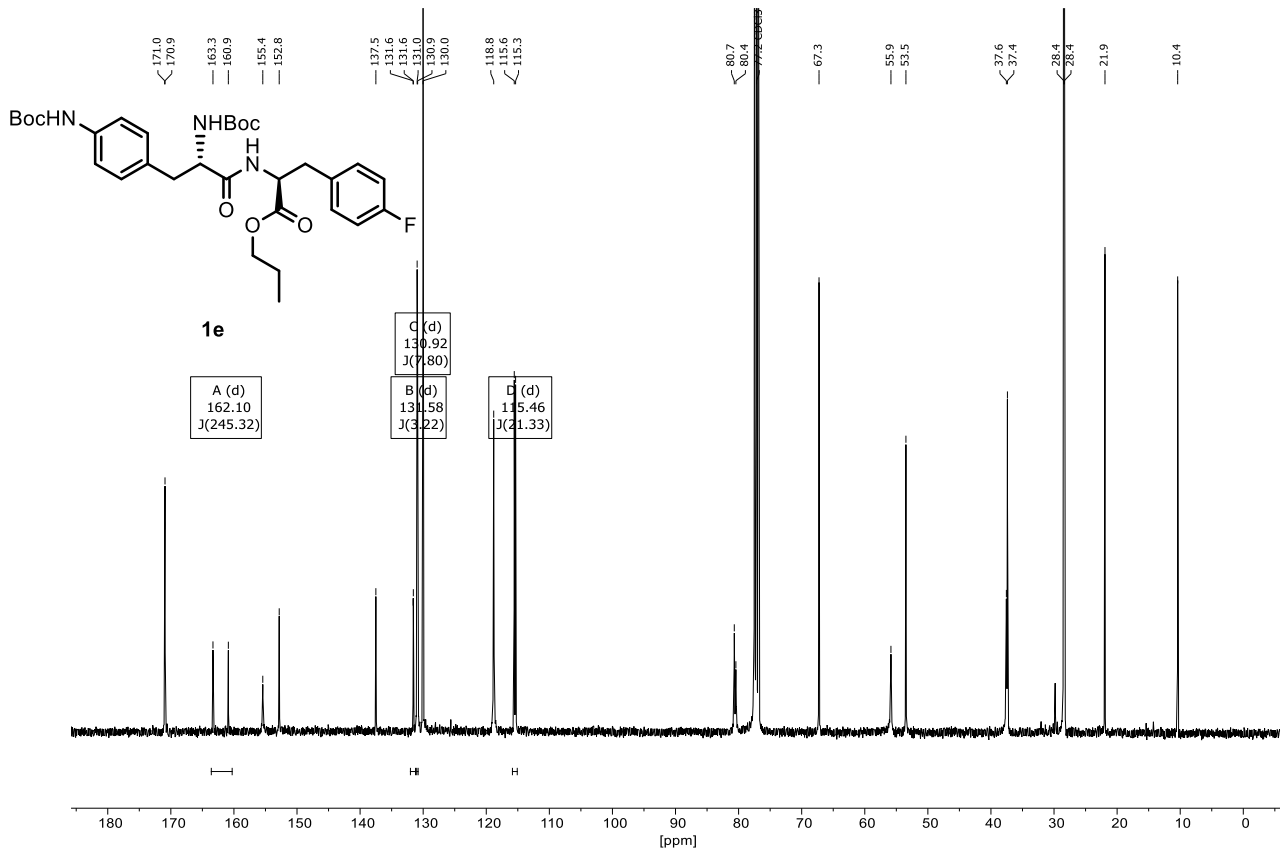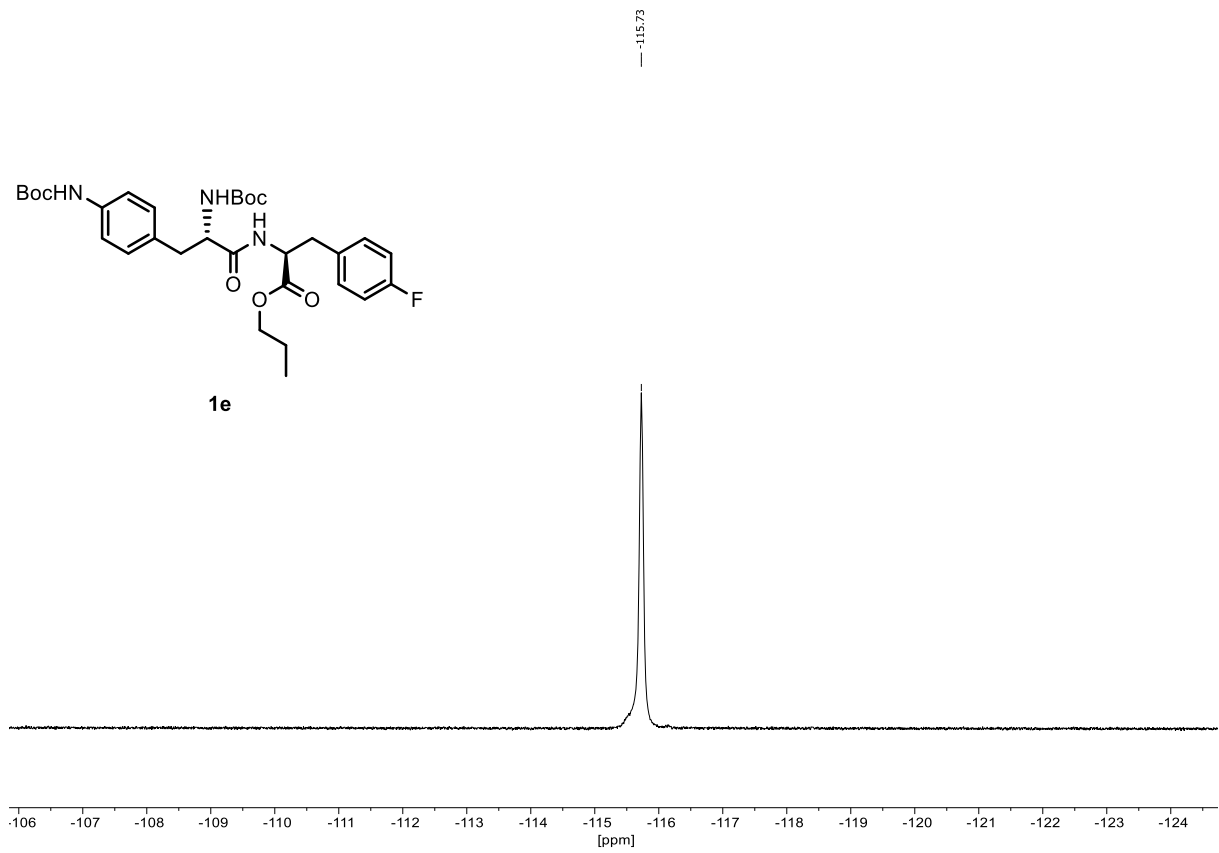

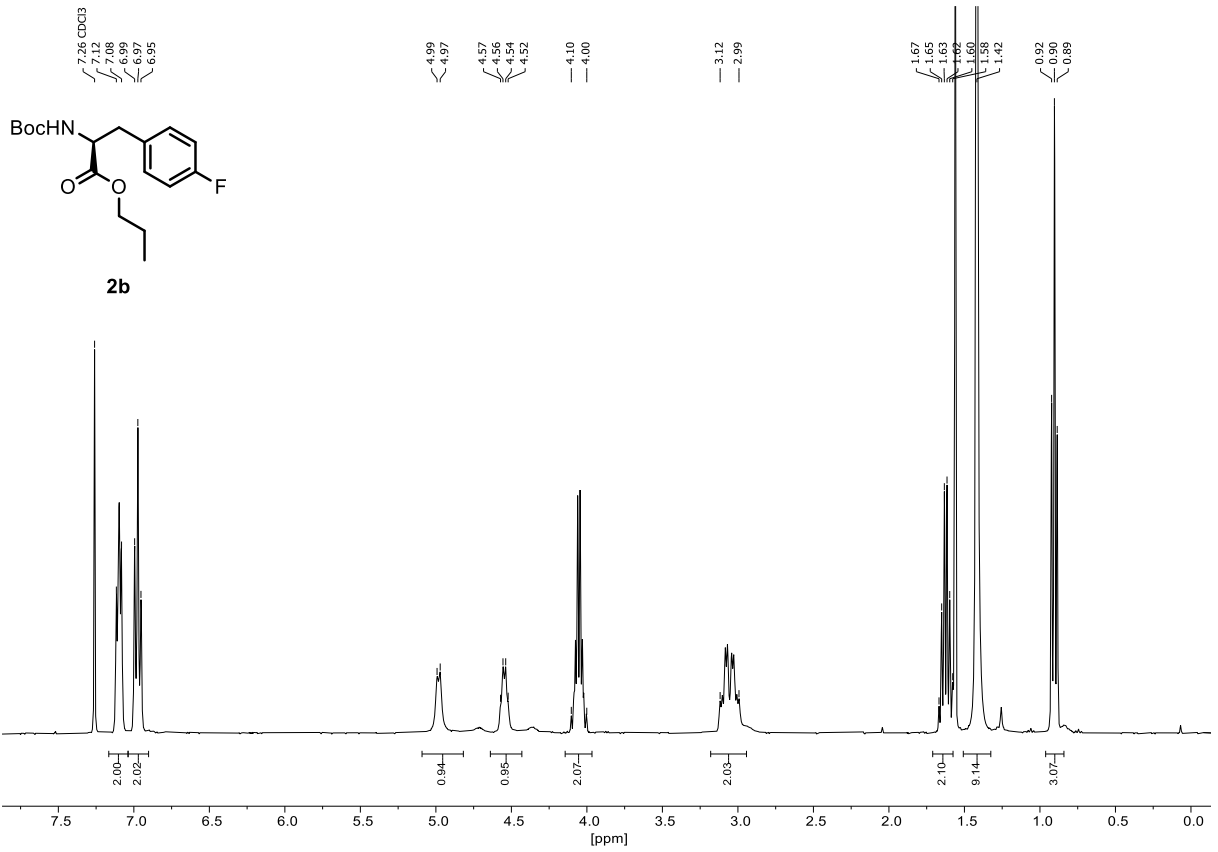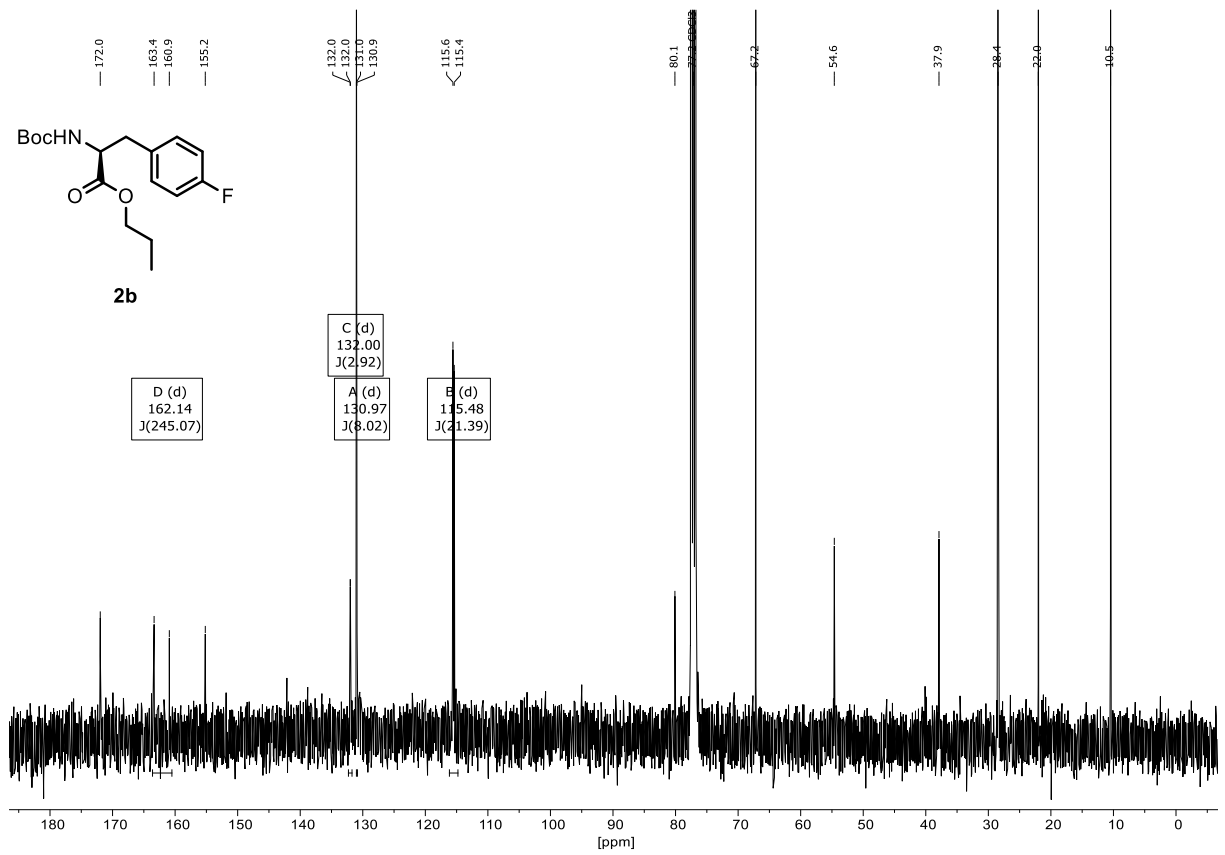

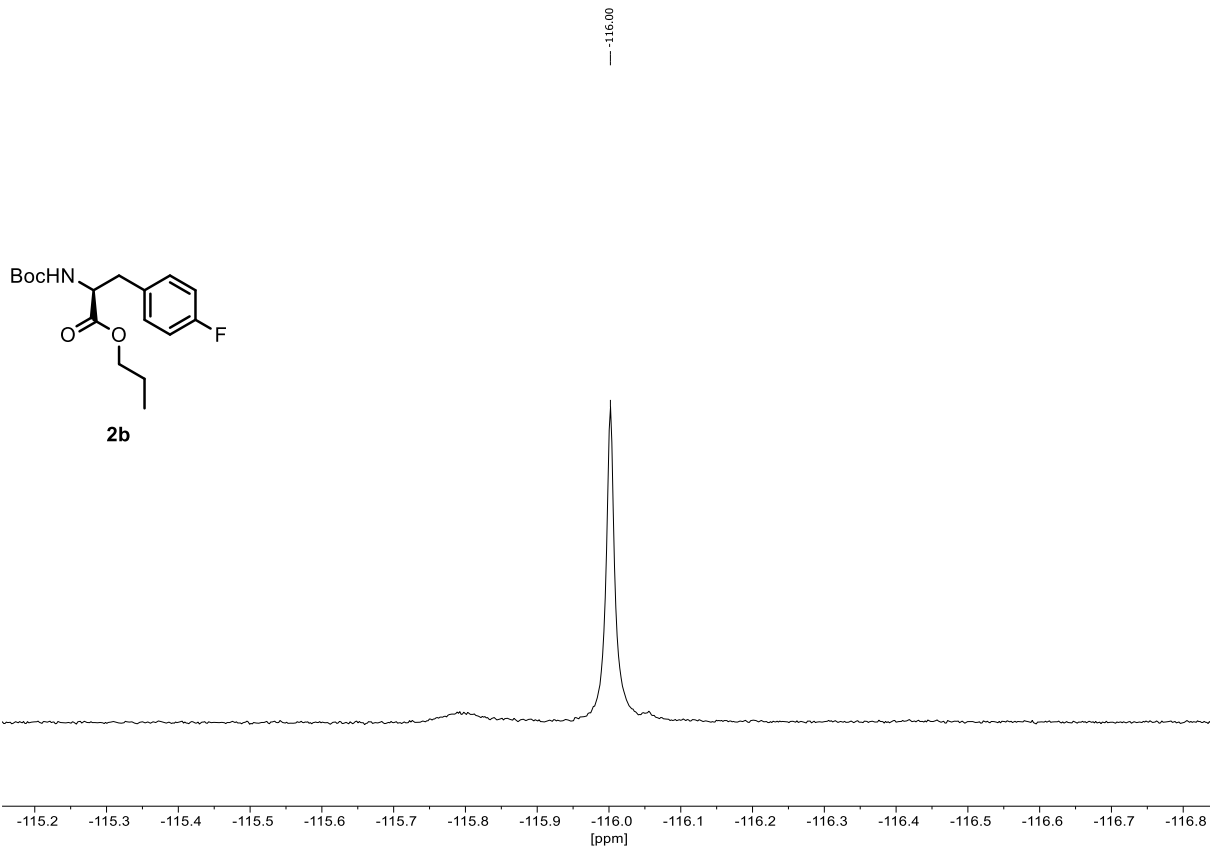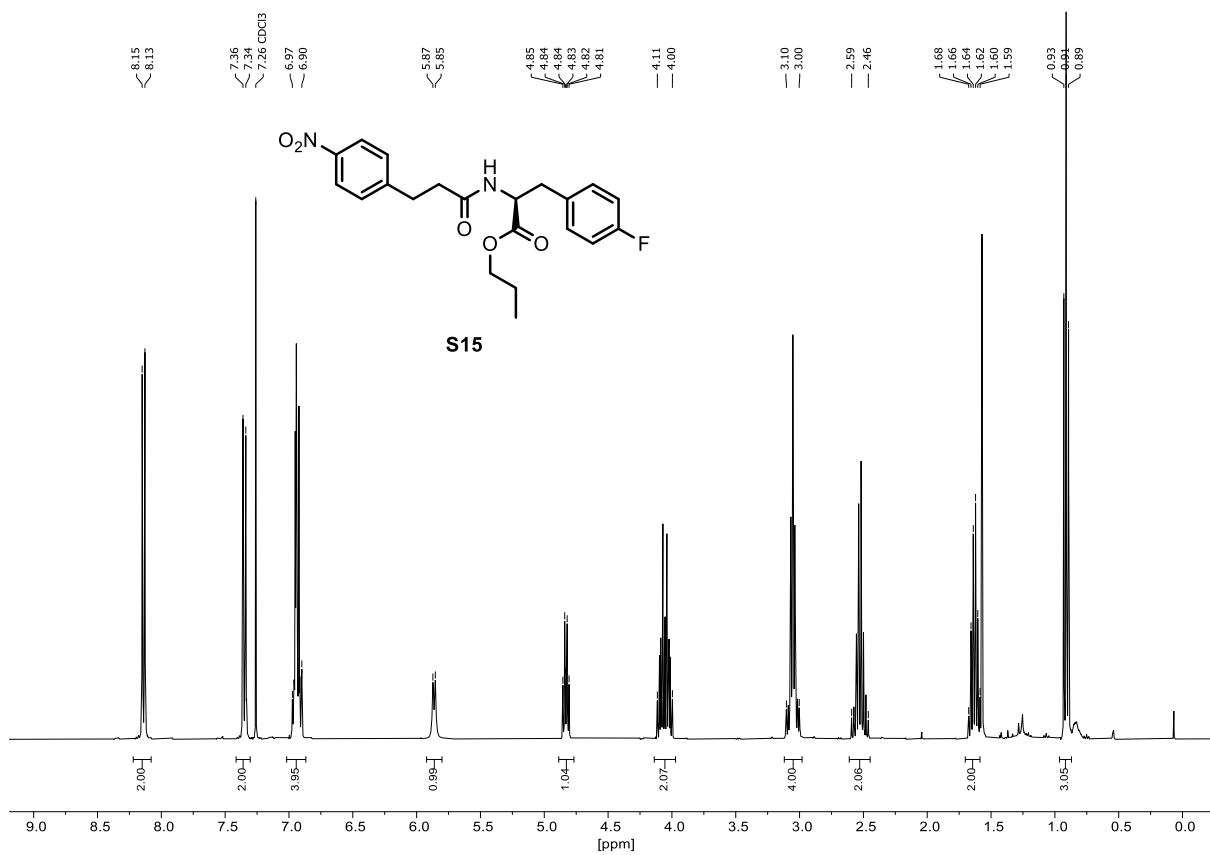

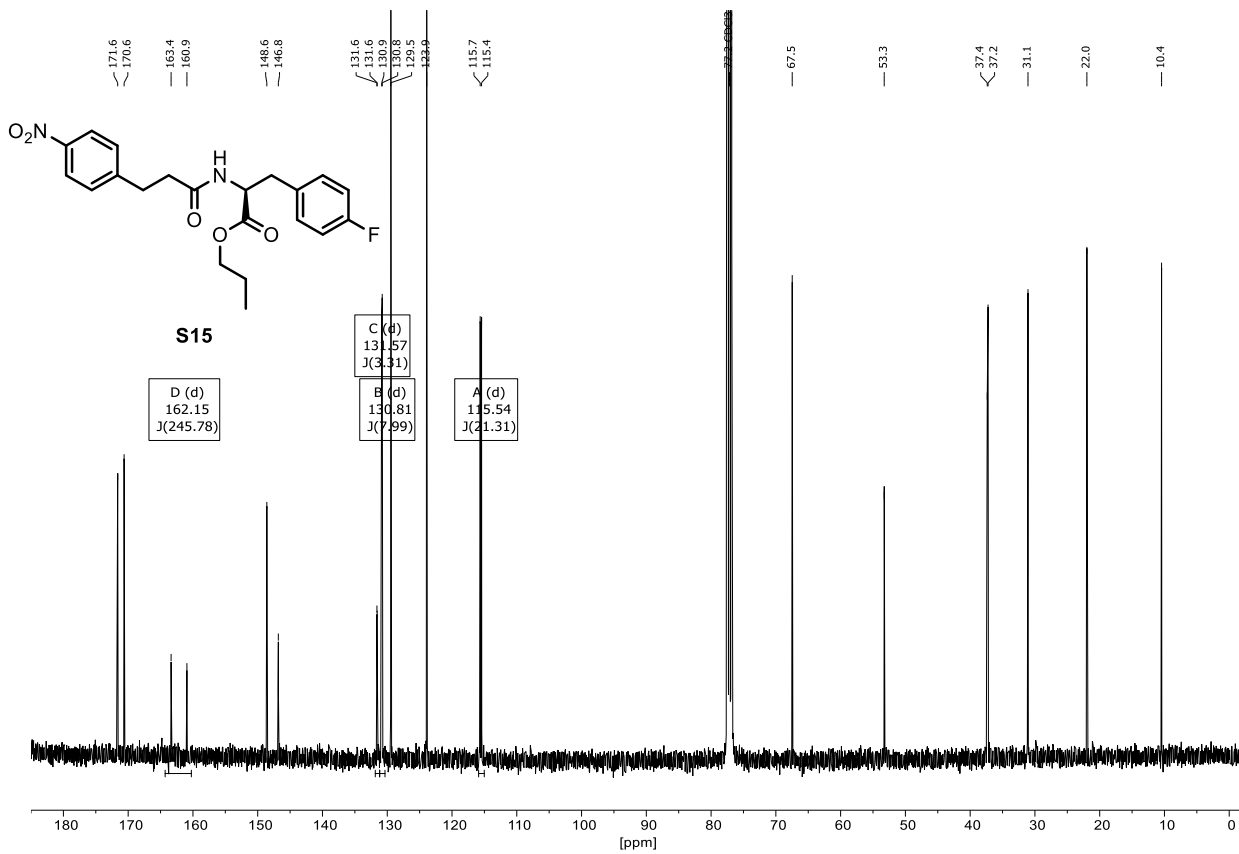

Chemical shifts (ppm): -116.54, -116.55, -116.56, -116.58, -116.59, -116.60, -116.61.

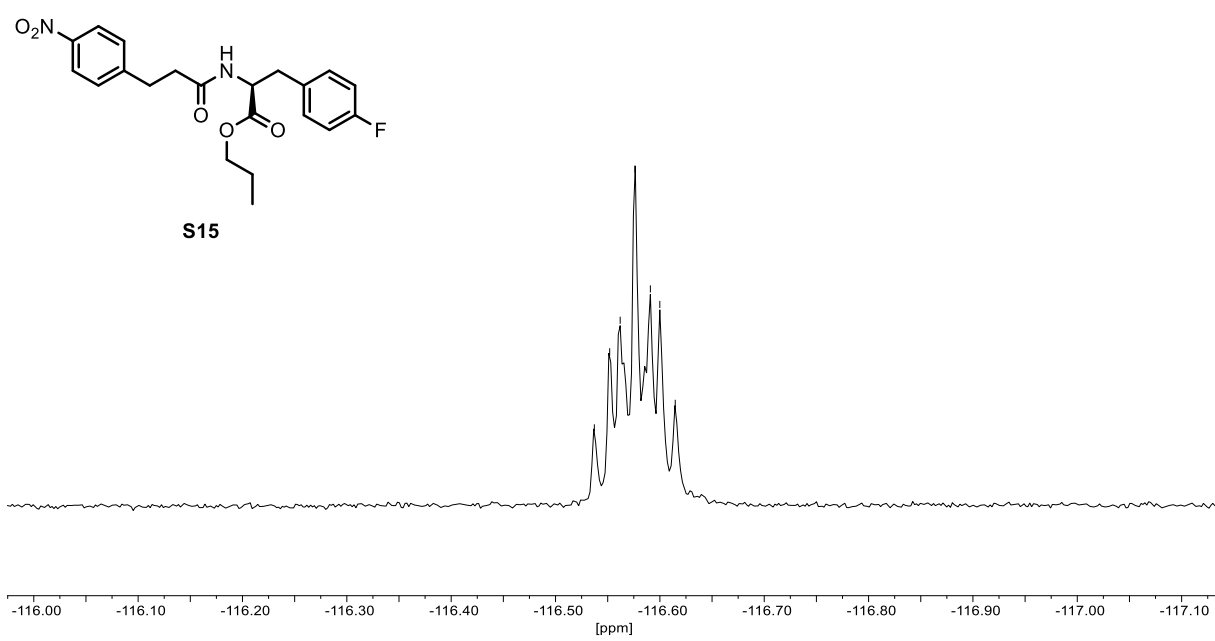

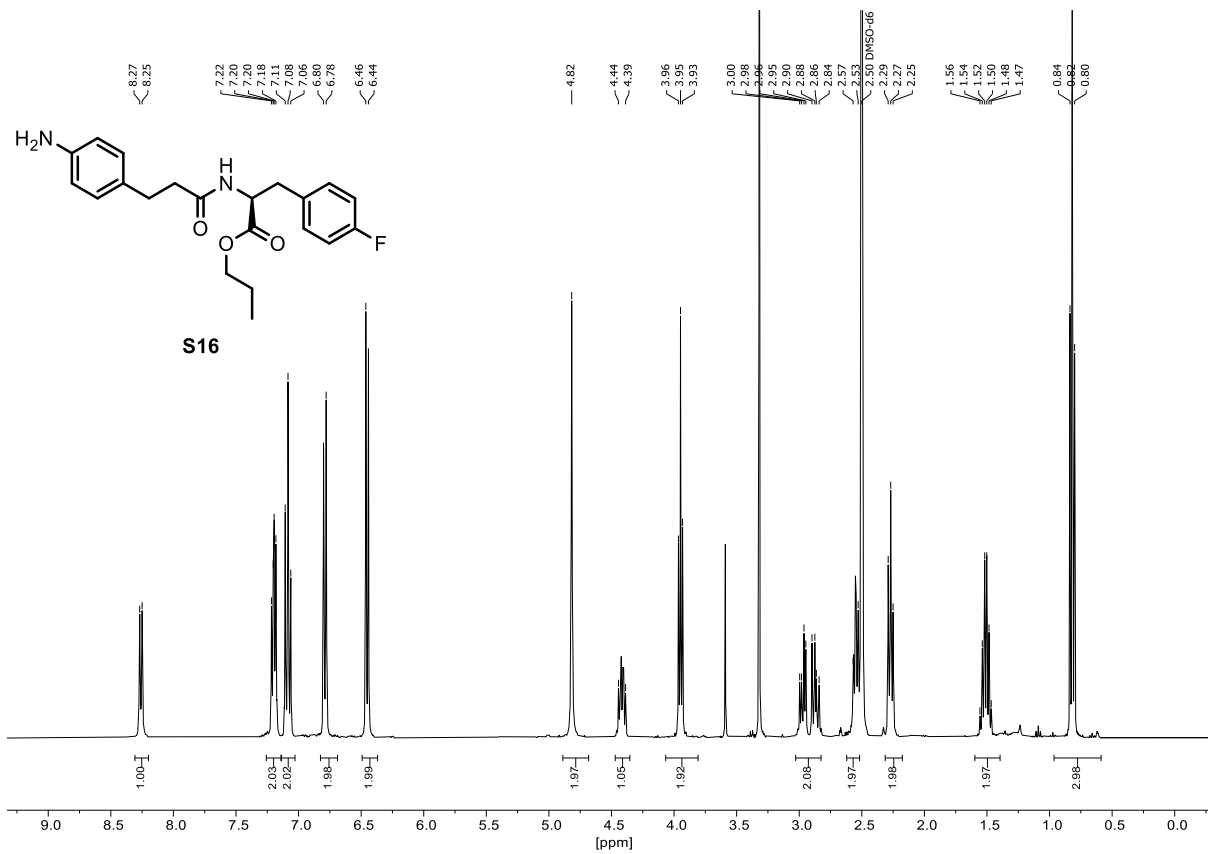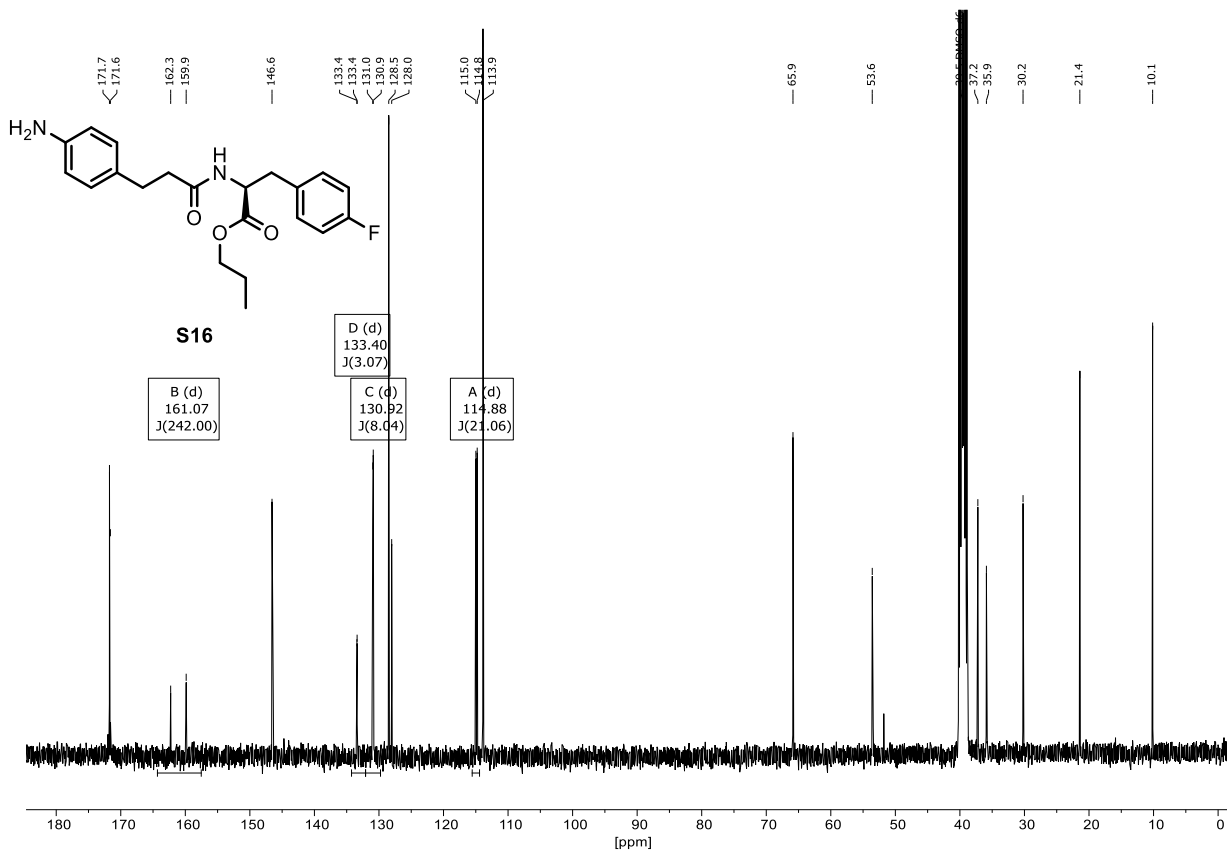

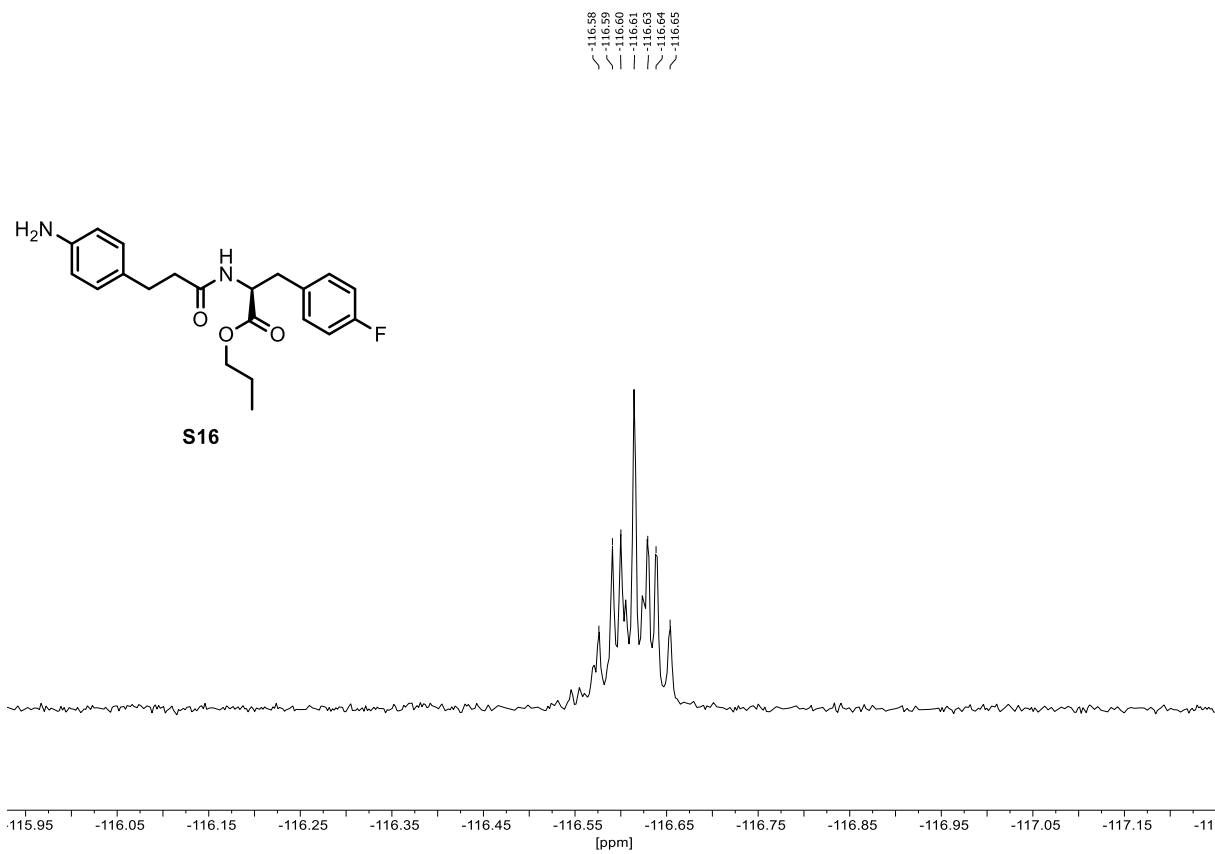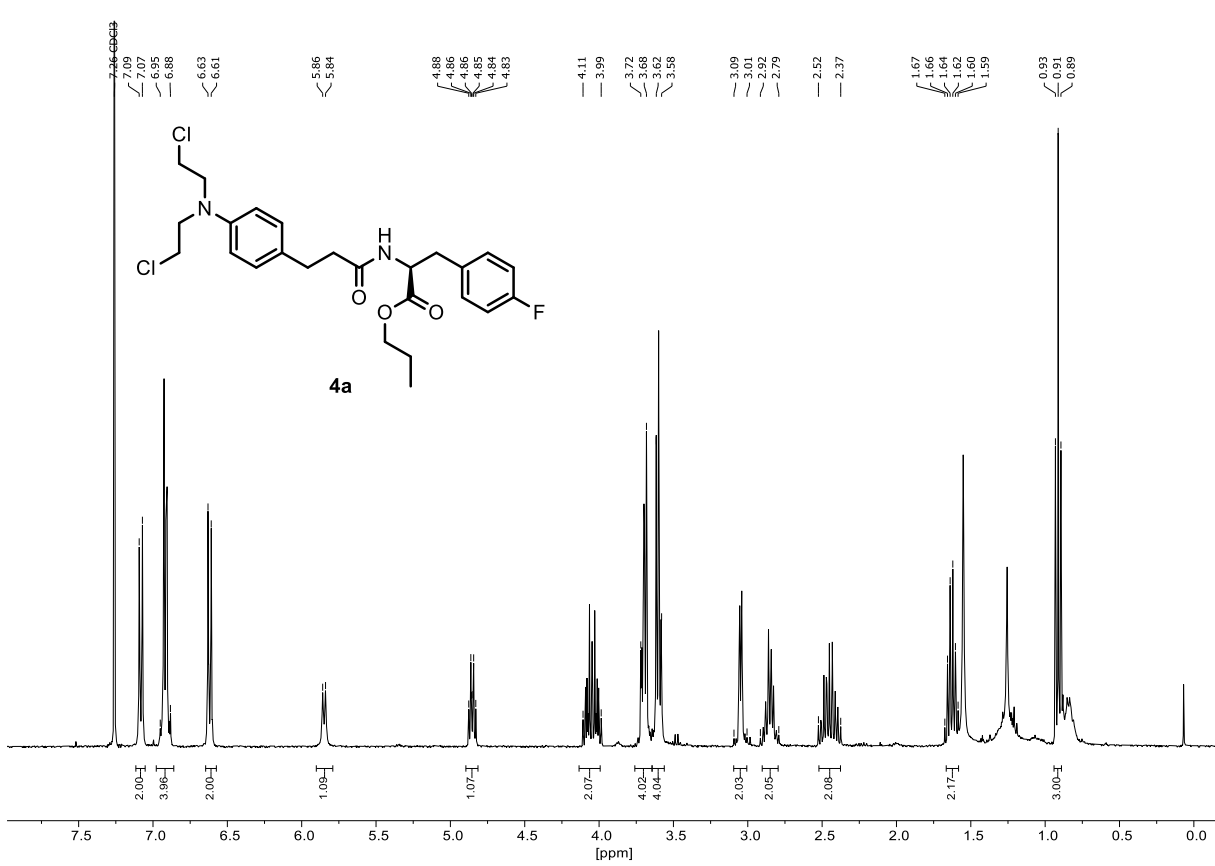

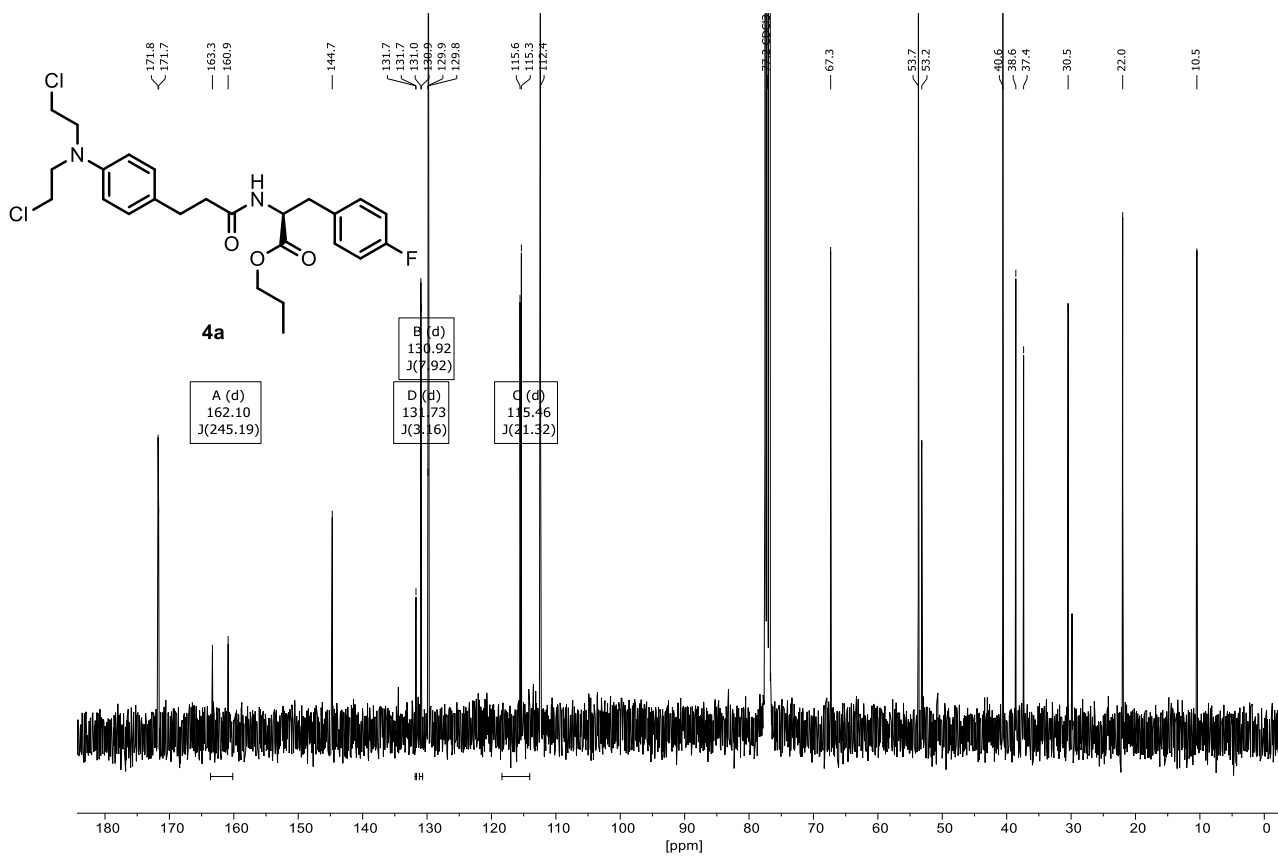

115.65  
115.66  
115.67  
115.69  
115.70  
115.71  
115.72

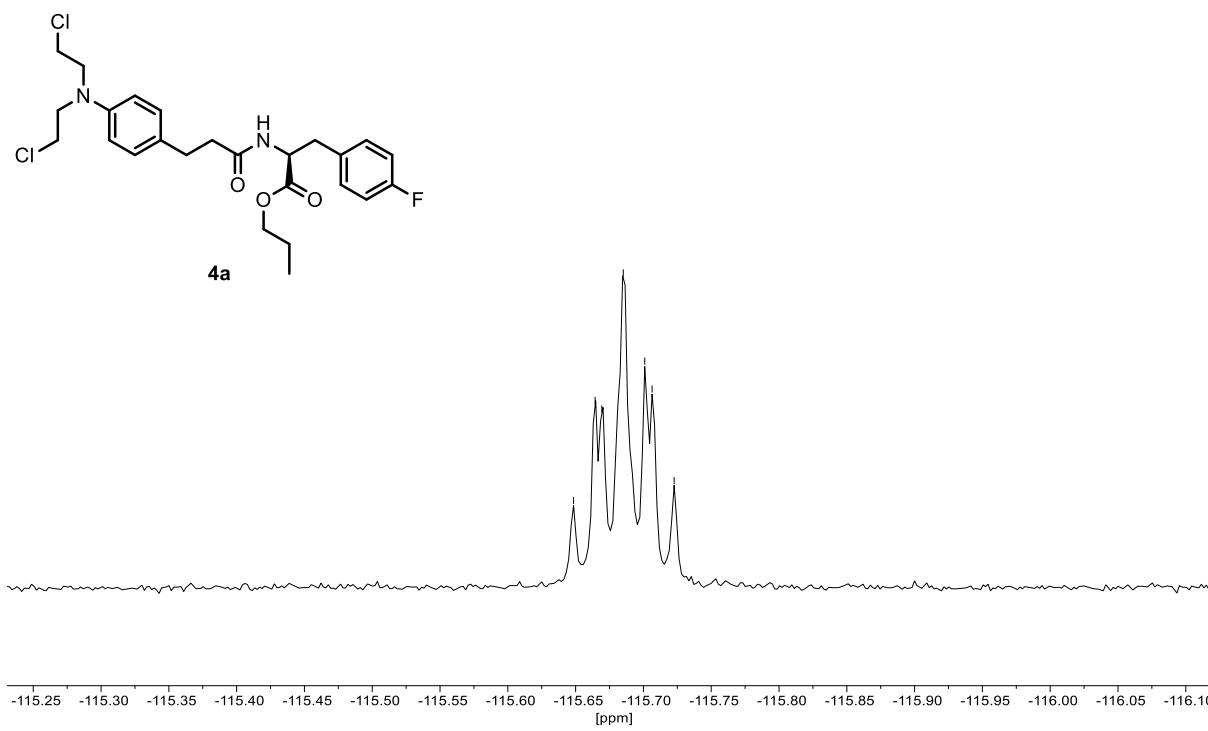

## 7.2. Radio/UV Analytical HPLC Chromatograms

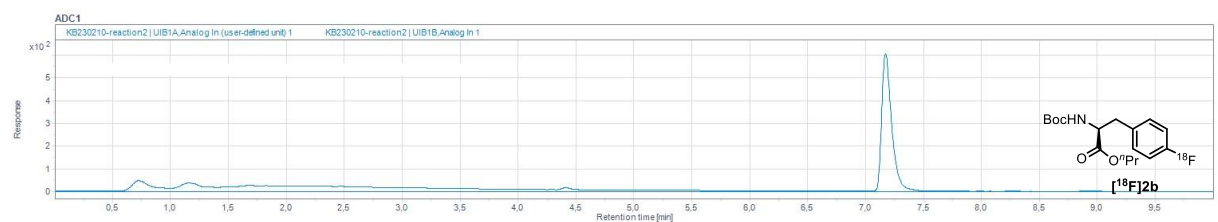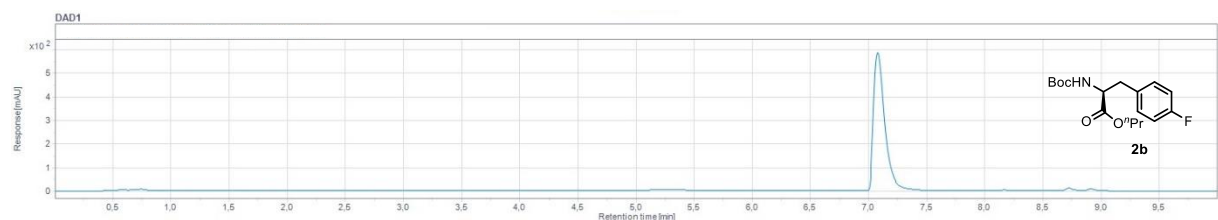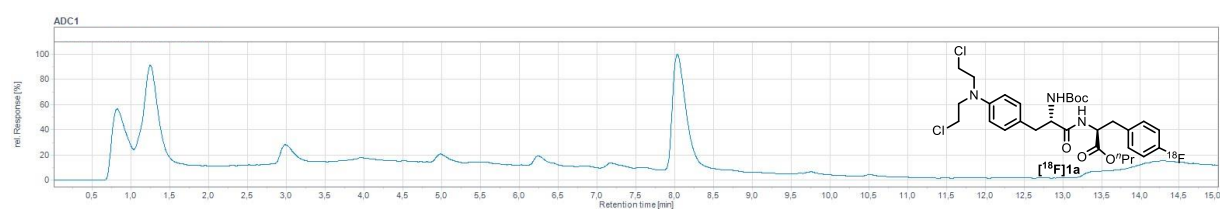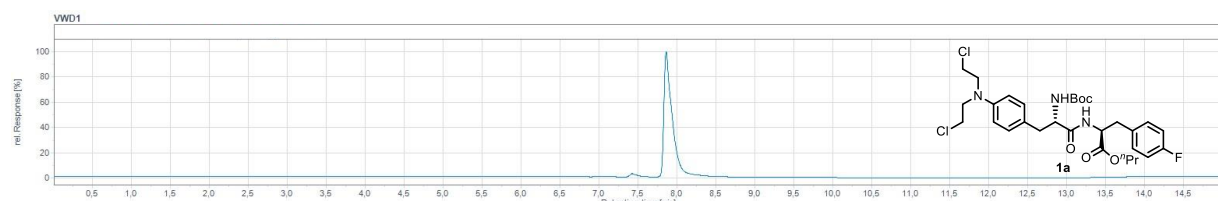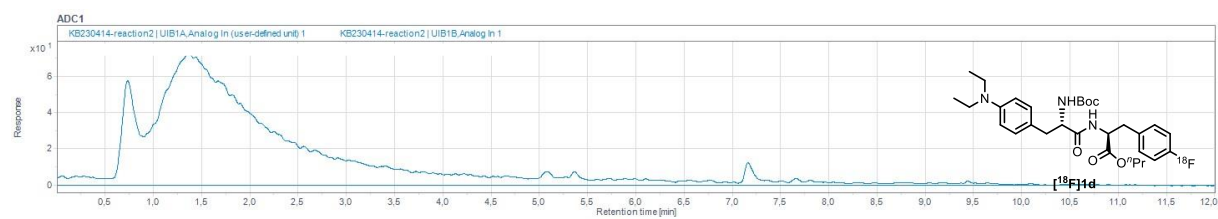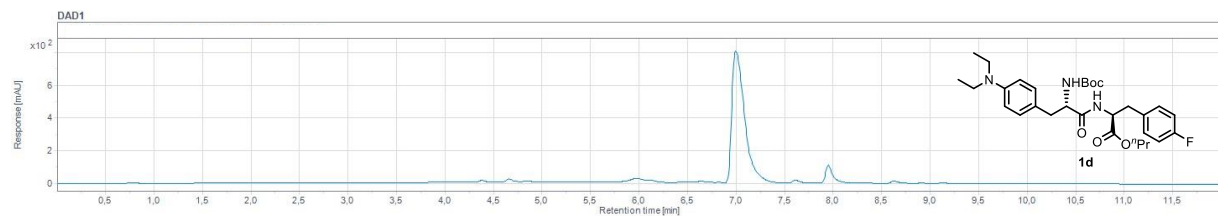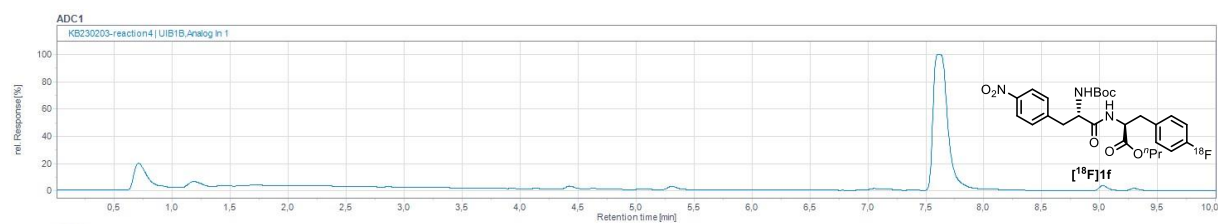



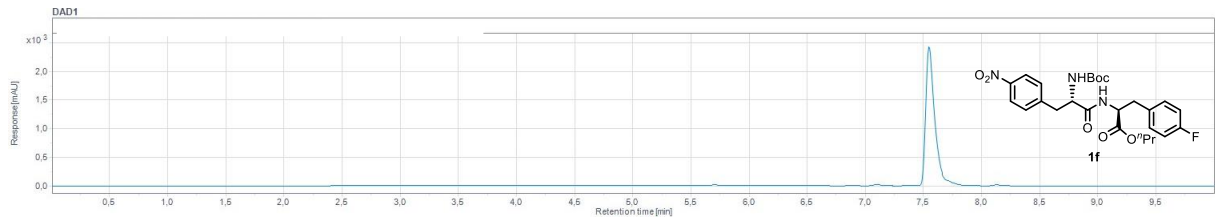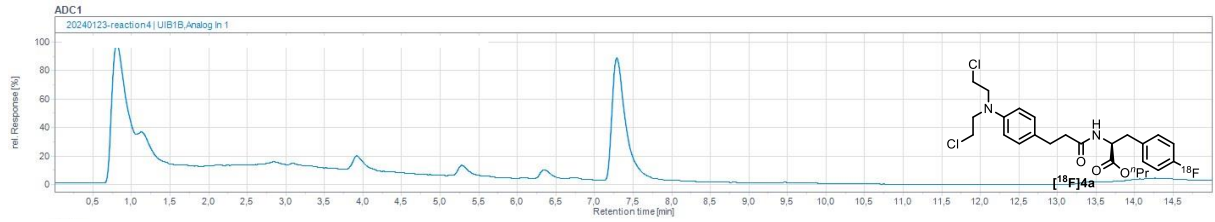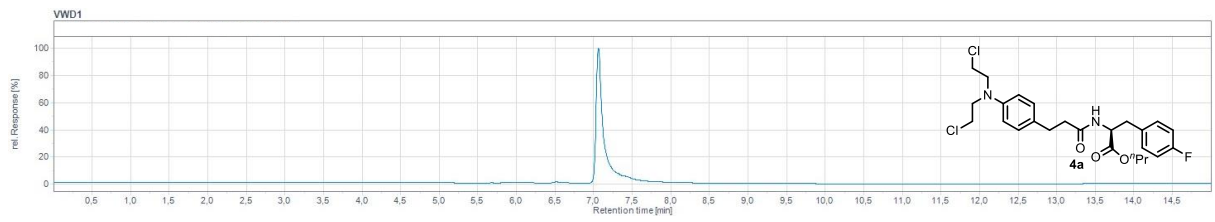

Supplement: d4qo01594k1.pdf [file d4qo01594k1.pdf]
